# Supplementary material
Source: PubMed Central journal article supplement (PMC3045865)
Supplement: NIHMS246688-supplement-Table_S3B.pdf [file NIHMS246688-supplement-Table_S3B.pdf]

**Supplemental Table 3B.** Two-locus Haplotypes and Associated LD values in Spanish Americans.

| Population       | Locus Pair | Haplotype | Haplotype Frequency | Haplotype Count | D        | D'ij     | Chi-Squared | Observed Count | Expected Count |
|------------------|------------|-----------|---------------------|-----------------|----------|----------|-------------|----------------|----------------|
| Spanish American | A:B        | 2902:4403 | 0.03325             | 18.6            | 0.02943  | 0.61128  | 144.13141   | 18.55532       | 2.1308         |
| Spanish American | A:B        | 0201:4402 | 0.02797             | 15.6            | 0.0195   | 0.62994  | 33.17279    | 15.60948       | 4.7312         |
| Spanish American | A:B        | 0101:0801 | 0.02732             | 15.2            | 0.02274  | 0.40355  | 72.43982    | 15.24711       | 2.5591         |
| Spanish American | A:B        | 0201:5101 | 0.02347             | 13.1            | 0.01152  | 0.26423  | 8.36469     | 13.09632       | 6.6667         |
| Spanish American | A:B        | 0201:0801 | 0.01918             | 10.7            | 0.00608  | 0.12712  | 2.13543     | 10.70436       | 7.3118         |
| Spanish American | A:B        | 0301:0702 | 0.01771             | 9.9             | 0.01308  | 0.26622  | 23.87358    | 9.88011        | 2.5806         |
| Spanish American | A:B        | 1101:3501 | 0.01735             | 9.7             | 0.01396  | 0.26763  | 36.23254    | 9.67982        | 1.8889         |
| Spanish American | A:B        | 0301:1801 | 0.01377             | 7.7             | 0.00946  | 0.20617  | 13.31401    | 7.68486        | 2.4086         |
| Spanish American | A:B        | 0201:1801 | 0.01311             | 7.3             | 0.00232  | 0.05886  | 0.37277     | 7.31514        | 6.0215         |
| Spanish American | A:B        | 3301:1402 | 0.01254             | 7               | 0.01187  | 0.48619  | 122.87969   | 7              | 0.3763         |
| Spanish American | A:B        | 0201:1501 | 0.01236             | 6.9             | 0.00542  | 0.21408  | 3.11154     | 6.89577        | 3.871          |
| Spanish American | A:B        | 2402:5101 | 0.01223             | 6.8             | 0.00665  | 0.13312  | 5.21441     | 6.82376        | 3.1111         |
| Spanish American | A:B        | 0201:3501 | 0.01125             | 6.3             | -0.00185 | -0.14111 | 0.19751     | 6.28009        | 7.3118         |
| Spanish American | A:B        | 3002:1801 | 0.01075             | 6               | 0.00922  | 0.31876  | 33.72275    | 6              | 0.853          |
| Spanish American | A:B        | 2301:4403 | 0.0093              | 5.2             | 0.00601  | 0.14474  | 6.91399     | 5.18953        | 1.8369         |
| Spanish American | A:B        | 0301:4403 | 0.00907             | 5.1             | 0.00275  | 0.04097  | 0.78926     | 5.06221        | 3.5269         |
| Spanish American | A:B        | 6803:3905 | 0.00896             | 5               | 0.00873  | 0.82967  | 189.96275   | 5              | 0.129          |
| Spanish American | A:B        | 0201:0702 | 0.0084              | 4.7             | -0.00317 | -0.27376 | 0.65098     | 4.68542        | 6.4516         |
| Spanish American | A:B        | 2402:3512 | 0.00837             | 4.7             | 0.00675  | 0.46508  | 17.73653    | 4.66884        | 0.9032         |
| Spanish American | A:B        | 0201:5001 | 0.00798             | 4.5             | 0.00297  | 0.16262  | 1.28474     | 4.45511        | 2.7957         |
| Spanish American | A:B        | 2402:3503 | 0.00744             | 4.2             | 0.00565  | 0.35019  | 11.19378    | 4.15404        | 1.0036         |
| Spanish American | A:B        | 2402:3502 | 0.00717             | 4               | 0.00609  | 0.62948  | 21.54412    | 4              | 0.6022         |
| Spanish American | A:B        | 6801:5201 | 0.00717             | 4               | 0.00632  | 0.30597  | 27.97197    | 4              | 0.4731         |
| Spanish American | A:B        | 2601:3701 | 0.00717             | 4               | 0.00678  | 0.48619  | 69.45096    | 4              | 0.2151         |
| Spanish American | A:B        | 0201:4001 | 0.00717             | 4               | 0.0037   | 0.29224  | 2.85147     | 4              | 1.9355         |
| Spanish American | A:B        | 0201:3517 | 0.00717             | 4               | 0.00447  | 0.45401  | 5.33344     | 4              | 1.5054         |
| Spanish American | A:B        | 2402:3906 | 0.00717             | 4               | 0.00573  | 0.44422  | 14.35752    | 4              | 0.8029         |
| Spanish American | A:B        | 1101:2705 | 0.00717             | 4               | 0.00597  | 0.29412  | 18.03491    | 4              | 0.6667         |
| Spanish American | A:B        | 0201:4501 | 0.00717             | 4               | 0.00447  | 0.45401  | 5.33344     | 4              | 1.5054         |
| Spanish American | A:B        | 2601:3801 | 0.00717             | 4               | 0.00673  | 0.4291   | 60.97125    | 4              | 0.2419         |

|                  |     |           |         |     |          |          |          |         |        |
|------------------|-----|-----------|---------|-----|----------|----------|----------|---------|--------|
| Spanish American | A:B | 2402:2705 | 0.00717 | 4   | 0.00501  | 0.25896  | 7.37255  | 4       | 1.2043 |
| Spanish American | A:B | 0201:1503 | 0.007   | 3.9 | 0.00314  | 0.22342  | 1.85517  | 3.90425 | 2.1505 |
| Spanish American | A:B | 6801:5101 | 0.00692 | 3.9 | 0.00473  | 0.12699  | 6.27874  | 3.86077 | 1.2222 |
| Spanish American | A:B | 0101:4002 | 0.00655 | 3.7 | 0.00426  | 0.1512   | 4.92452  | 3.65643 | 1.2796 |
| Spanish American | A:B | 0101:3501 | 0.00637 | 3.6 | 0.00179  | 0.03174  | 0.44816  | 3.55711 | 2.5591 |
| Spanish American | A:B | 0201:4403 | 0.00597 | 3.3 | -0.00984 | -0.62247 | 4.69759  | 3.32874 | 8.8172 |
| Spanish American | A:B | 1101:0702 | 0.00594 | 3.3 | 0.00295  | 0.05816  | 1.82324  | 3.31458 | 1.6667 |
| Spanish American | A:B | 2301:3501 | 0.00547 | 3.1 | 0.00274  | 0.0651   | 1.70955  | 3.05167 | 1.5233 |
| Spanish American | A:B | 0206:3905 | 0.00538 | 3   | 0.00457  | 0.22067  | 15.27098 | 3       | 0.4516 |
| Spanish American | A:B | 1101:5101 | 0.00538 | 3   | 0.00229  | 0.04364  | 1.06284  | 3       | 1.7222 |
| Spanish American | A:B | 2402:5801 | 0.00538 | 3   | 0.00358  | 0.22191  | 4.49503  | 3       | 1.0036 |
| Spanish American | A:B | 2501:1801 | 0.00538 | 3   | 0.00466  | 0.34198  | 17.96733 | 3       | 0.4014 |
| Spanish American | A:B | 0206:3517 | 0.00538 | 3   | 0.0049   | 0.40623  | 29.91363 | 3       | 0.2634 |
| Spanish American | A:B | 0205:4901 | 0.00538 | 3   | 0.00491  | 0.23352  | 30.42771 | 3       | 0.2581 |
| Spanish American | A:B | 0201:3906 | 0.00538 | 3   | 0.00229  | 0.20377  | 1.23005  | 3       | 1.7204 |
| Spanish American | A:B | 2402:4901 | 0.00538 | 3   | 0.00322  | 0.16633  | 3.04161  | 3       | 1.2043 |
| Spanish American | A:B | 3101:4402 | 0.00538 | 3   | 0.00403  | 0.12333  | 7.28926  | 3       | 0.7491 |
| Spanish American | A:B | 0201:3801 | 0.00538 | 3   | 0.00191  | 0.15068  | 0.75812  | 3       | 1.9355 |
| Spanish American | A:B | 0206:4002 | 0.00538 | 3   | 0.00423  | 0.14427  | 9.33181  | 3       | 0.6398 |
| Spanish American | A:B | 2402:3901 | 0.00538 | 3   | 0.00484  | 1        | 27.03822 | 3       | 0.3011 |
| Spanish American | A:B | 0301:1402 | 0.00538 | 3   | 0.00306  | 0.12471  | 2.547    | 3       | 1.2903 |
| Spanish American | A:B | 3101:3501 | 0.00538 | 3   | 0.0033   | 0.10325  | 3.23197  | 3       | 1.1577 |
| Spanish American | A:B | 6802:5301 | 0.00538 | 3   | 0.00511  | 0.41601  | 55.82194 | 3       | 0.1505 |
| Spanish American | A:B | 3002:0801 | 0.00538 | 3   | 0.00352  | 0.12304  | 4.09071  | 3       | 1.0358 |
| Spanish American | A:B | 3001:1302 | 0.00538 | 3   | 0.00503  | 0.31868  | 42.26968 | 3       | 0.1935 |
| Spanish American | A:B | 0206:3908 | 0.00538 | 3   | 0.00511  | 0.74021  | 56.44817 | 2.99995 | 0.1505 |
| Spanish American | A:B | 1101:5201 | 0.0052  | 2.9 | 0.00401  | 0.19743  | 8.12671  | 2.90425 | 0.6667 |
| Spanish American | A:B | 0206:1515 | 0.00519 | 2.9 | 0.00472  | 0.39076  | 27.67937 | 2.89582 | 0.2634 |
| Spanish American | A:B | 2301:0702 | 0.00495 | 2.8 | 0.00254  | 0.05994  | 1.65478  | 2.76194 | 1.3441 |
| Spanish American | A:B | 0301:4001 | 0.00483 | 2.7 | 0.00344  | 0.23347  | 5.29771  | 2.69466 | 0.7742 |
| Spanish American | A:B | 2402:1501 | 0.00466 | 2.6 | 0.00142  | 0.04907  | 0.40155  | 2.60114 | 1.8065 |
| Spanish American | A:B | 6801:3503 | 0.00455 | 2.5 | 0.00385  | 0.22344  | 12.38617 | 2.54062 | 0.3943 |

|                  |     |           |         |     |          |         |           |         |        |
|------------------|-----|-----------|---------|-----|----------|---------|-----------|---------|--------|
| Spanish American | A:B | 2402:3501 | 0.00435 | 2.4 | -0.00177 | -0.2891 | 0.33757   | 2.42572 | 3.4122 |
| Spanish American | A:B | 6801:1501 | 0.0043  | 2.4 | 0.00303  | 0.0977  | 4.32517   | 2.39886 | 0.7097 |
| Spanish American | A:B | 2902:0702 | 0.00414 | 2.3 | 0.00134  | 0.02734 | 0.40248   | 2.30943 | 1.5591 |
| Spanish American | A:B | 0301:3503 | 0.00413 | 2.3 | 0.00259  | 0.15811 | 2.70472   | 2.30534 | 0.8602 |
| Spanish American | A:B | 0301:5001 | 0.00386 | 2.2 | 0.00186  | 0.08714 | 1.07388   | 2.15367 | 1.1183 |
| Spanish American | A:B | 2902:1302 | 0.00382 | 2.1 | 0.00298  | 0.19478 | 6.33068   | 2.12965 | 0.4677 |
| Spanish American | A:B | 0201:1515 | 0.00377 | 2.1 | 0.00107  | 0.10899 | 0.30735   | 2.10423 | 1.5054 |
| Spanish American | A:B | 0201:3701 | 0.00371 | 2.1 | 0.00063  | 0.05591 | 0.09261   | 2.07153 | 1.7204 |
| Spanish American | A:B | 2301:0801 | 0.00367 | 2   | 0.00094  | 0.02237 | 0.2019    | 2.04853 | 1.5233 |
| Spanish American | A:B | 3301:7801 | 0.00358 | 2   | 0.00345  | 0.65809 | 50.75766  | 2       | 0.0753 |
| Spanish American | A:B | 0201:5802 | 0.00358 | 2   | 0.00243  | 0.57534 | 3.64425   | 2       | 0.6452 |
| Spanish American | A:B | 0206:4801 | 0.00358 | 2   | 0.00311  | 0.25778 | 12.04588  | 2       | 0.2634 |
| Spanish American | A:B | 0201:3911 | 0.00358 | 2   | 0.00281  | 1       | 7.32626   | 2       | 0.4301 |
| Spanish American | A:B | 0205:4002 | 0.00358 | 2   | 0.00293  | 0.14048 | 7.70201   | 2       | 0.3656 |
| Spanish American | A:B | 2402:5201 | 0.00358 | 2   | 0.00143  | 0.07371 | 0.59722   | 2       | 1.2043 |
| Spanish American | A:B | 0301:3801 | 0.00358 | 2   | 0.0022   | 0.14902 | 2.15834   | 2       | 0.7742 |
| Spanish American | A:B | 3601:5301 | 0.00358 | 2   | 0.00351  | 1       | 91.32734  | 2       | 0.043  |
| Spanish American | A:B | 0301:5801 | 0.00358 | 2   | 0.00204  | 0.12471 | 1.68251   | 2       | 0.8602 |
| Spanish American | A:B | 2601:4901 | 0.00358 | 2   | 0.00301  | 0.14365 | 9.16054   | 2       | 0.3226 |
| Spanish American | A:B | 0211:4004 | 0.00358 | 2   | 0.00353  | 0.49639 | 137.49283 | 2       | 0.0287 |
| Spanish American | A:B | 3101:4002 | 0.00358 | 2   | 0.00255  | 0.08654 | 3.72556   | 2       | 0.5789 |
| Spanish American | A:B | 2301:1503 | 0.00358 | 2   | 0.00278  | 0.16248 | 5.73089   | 2       | 0.448  |
| Spanish American | A:B | 1101:5601 | 0.00358 | 2   | 0.00329  | 0.64706 | 21.46836  | 2       | 0.1667 |
| Spanish American | A:B | 0201:5701 | 0.00358 | 2   | 0.00089  | 0.09002 | 0.20968   | 2       | 1.5054 |
| Spanish American | A:B | 0101:4901 | 0.00358 | 2   | 0.00197  | 0.09884 | 1.47185   | 2       | 0.9032 |
| Spanish American | A:B | 0301:1401 | 0.00358 | 2   | 0.00297  | 0.45294 | 8.78207   | 2       | 0.3441 |
| Spanish American | A:B | 1101:1801 | 0.00358 | 2   | 0.0008   | 0.01681 | 0.14156   | 2       | 1.5556 |
| Spanish American | A:B | 3301:4403 | 0.00358 | 2   | 0.00174  | 0.07488 | 1.01539   | 2       | 1.0287 |
| Spanish American | A:B | 2501:1501 | 0.00358 | 2   | 0.00312  | 0.225   | 12.32673  | 2       | 0.2581 |
| Spanish American | A:B | 3101:3903 | 0.00358 | 2   | 0.00346  | 1       | 56.94093  | 2       | 0.0681 |
| Spanish American | A:B | 0301:4701 | 0.00358 | 2   | 0.00328  | 1       | 21.32644  | 2       | 0.172  |
| Spanish American | A:B | 3201:3501 | 0.00358 | 2   | 0.00271  | 0.20134 | 5.07056   | 2       | 0.4875 |

|                  |     |           |         |     |          |          |           |         |        |
|------------------|-----|-----------|---------|-----|----------|----------|-----------|---------|--------|
| Spanish American | A:B | 0101:4501 | 0.00358 | 2   | 0.00264  | 0.22757  | 4.51055   | 2       | 0.5269 |
| Spanish American | A:B | 0201:5102 | 0.00358 | 2   | 0.00281  | 1        | 7.32626   | 2       | 0.4301 |
| Spanish American | A:B | 2902:5101 | 0.00358 | 2   | 0.0007   | 0.0142   | 0.10484   | 2       | 1.6111 |
| Spanish American | A:B | 0205:5001 | 0.00358 | 2   | 0.00308  | 0.14679  | 11.07804  | 2       | 0.2796 |
| Spanish American | A:B | 0101:5201 | 0.00358 | 2   | 0.00197  | 0.09884  | 1.47185   | 2       | 0.9032 |
| Spanish American | A:B | 8001:1402 | 0.00358 | 2   | 0.00344  | 0.65746  | 47.19628  | 2       | 0.0806 |
| Spanish American | A:B | 0301:5301 | 0.00358 | 2   | 0.00173  | 0.08824  | 1.01446   | 2       | 1.0323 |
| Spanish American | A:B | 0101:3701 | 0.00346 | 1.9 | 0.00238  | 0.17928  | 3.20516   | 1.92847 | 0.6022 |
| Spanish American | A:B | 6801:4801 | 0.003   | 1.7 | 0.0025   | 0.20784  | 7.46064   | 1.6735  | 0.276  |
| Spanish American | A:B | 2301:5501 | 0.00279 | 1.6 | 0.00231  | 0.22479  | 6.53394   | 1.55711 | 0.2688 |
| Spanish American | A:B | 0101:5501 | 0.00259 | 1.4 | 0.00178  | 0.17866  | 2.37849   | 1.44289 | 0.4516 |
| Spanish American | A:B | 2301:5001 | 0.00249 | 1.4 | 0.00145  | 0.06513  | 1.20382   | 1.39122 | 0.5824 |
| Spanish American | A:B | 0201:4002 | 0.00241 | 1.3 | -0.00414 | -0.63249 | 1.92179   | 1.34357 | 3.6559 |
| Spanish American | A:B | 2402:4801 | 0.00238 | 1.3 | 0.00112  | 0.09909  | 0.62391   | 1.3265  | 0.7025 |
| Spanish American | A:B | 6801:4001 | 0.00234 | 1.3 | 0.0017   | 0.10995  | 2.69407   | 1.30534 | 0.3548 |
| Spanish American | A:B | 2402:4402 | 0.00228 | 1.3 | -0.00168 | -0.42431 | 0.45999   | 1.27105 | 2.2079 |
| Spanish American | A:B | 6801:3512 | 0.00219 | 1.2 | 0.00155  | 0.10018  | 2.23671   | 1.22091 | 0.3548 |
| Spanish American | A:B | 0301:5101 | 0.00218 | 1.2 | -0.00259 | -0.54282 | 0.91025   | 1.21916 | 2.6667 |
| Spanish American | A:B | 0101:4403 | 0.00202 | 1.1 | -0.00351 | -0.63394 | 1.44754   | 1.12965 | 3.086  |
| Spanish American | A:B | 0101:4402 | 0.00201 | 1.1 | -0.00096 | -0.32396 | 0.19565   | 1.11946 | 1.6559 |
| Spanish American | A:B | 0201:3512 | 0.00199 | 1.1 | -0.00148 | -0.42637 | 0.45561   | 1.11024 | 1.9355 |
| Spanish American | A:B | 0206:1501 | 0.00198 | 1.1 | 0.00076  | 0.02464  | 0.28874   | 1.10423 | 0.6774 |
| Spanish American | A:B | 0201:5201 | 0.00196 | 1.1 | -0.00266 | -0.5754  | 1.11241   | 1.09575 | 2.5806 |
| Spanish American | A:B | 1101:1503 | 0.00196 | 1.1 | 0.00097  | 0.0572   | 0.5663    | 1.09575 | 0.5556 |
| Spanish American | A:B | 0101:0702 | 0.00188 | 1   | -0.00217 | -0.53565 | 0.74043   | 1.04853 | 2.2581 |
| Spanish American | A:B | 2902:3501 | 0.0018  | 1   | -0.00136 | -0.43091 | 0.36855   | 1.0056  | 1.767  |
| Spanish American | A:B | 1101:4403 | 0.0018  | 1   | -0.00228 | -0.55852 | 0.81199   | 1.0056  | 2.2778 |
| Spanish American | A:B | 3101:1518 | 0.00179 | 1   | 0.00161  | 0.30983  | 8.21397   | 1       | 0.1022 |
| Spanish American | A:B | 2601:0702 | 0.00179 | 1   | 0.00035  | 0.01364  | 0.05045   | 1       | 0.8065 |
| Spanish American | A:B | 6801:4402 | 0.00179 | 1   | 0.00024  | 0.00628  | 0.02197   | 1       | 0.8674 |
| Spanish American | A:B | 0101:5001 | 0.00179 | 1   | 0.00004  | 0.00179  | 0.00052   | 1       | 0.9785 |
| Spanish American | A:B | 6805:3908 | 0.00179 | 1   | 0.00178  | 1        | 138.74865 | 1       | 0.0072 |

|                  |     |           |         |   |          |          |           |   |        |
|------------------|-----|-----------|---------|---|----------|----------|-----------|---|--------|
| Spanish American | A:B | 6801:0702 | 0.00179 | 1 | -0.00033 | -0.15455 | 0.03108   | 1 | 1.1828 |
| Spanish American | A:B | 0201:3503 | 0.00179 | 1 | -0.00206 | -0.535   | 0.79849   | 1 | 2.1505 |
| Spanish American | A:B | 2501:3924 | 0.00179 | 1 | 0.00177  | 1        | 68.87343  | 1 | 0.0143 |
| Spanish American | A:B | 2402:1302 | 0.00179 | 1 | 0.00017  | 0.01195  | 0.01171   | 1 | 0.9032 |
| Spanish American | A:B | 3101:1302 | 0.00179 | 1 | 0.00124  | 0.07978  | 1.65158   | 1 | 0.3065 |
| Spanish American | A:B | 2601:8101 | 0.00179 | 1 | 0.00155  | 0.1779   | 5.78019   | 1 | 0.1344 |
| Spanish American | A:B | 6802:0801 | 0.00179 | 1 | 0.00103  | 0.08724  | 0.83152   | 1 | 0.4265 |
| Spanish American | A:B | 0301:1516 | 0.00179 | 1 | 0.00102  | 0.12471  | 0.83365   | 1 | 0.4301 |
| Spanish American | A:B | 2425:4801 | 0.00179 | 1 | 0.00177  | 1        | 78.8556   | 1 | 0.0125 |
| Spanish American | A:B | 2902:8101 | 0.00179 | 1 | 0.00133  | 0.15614  | 2.24381   | 1 | 0.2599 |
| Spanish American | A:B | 3001:8101 | 0.00179 | 1 | 0.0016   | 0.18242  | 7.63878   | 1 | 0.1075 |
| Spanish American | A:B | 0202:4430 | 0.00179 | 1 | 0.00179  | 1        | 278.4991  | 1 | 0.0036 |
| Spanish American | A:B | 6803:4002 | 0.00179 | 1 | 0.00146  | 0.14048  | 3.80914   | 1 | 0.1828 |
| Spanish American | A:B | 3102:4002 | 0.00179 | 1 | 0.00174  | 1        | 31.88066  | 1 | 0.0305 |
| Spanish American | A:B | 3001:5301 | 0.00179 | 1 | 0.00133  | 0.06319  | 2.22786   | 1 | 0.2581 |
| Spanish American | A:B | 3201:4403 | 0.00179 | 1 | 0.00074  | 0.05561  | 0.31649   | 1 | 0.5878 |
| Spanish American | A:B | 2402:1518 | 0.00179 | 1 | 0.00125  | 0.25896  | 1.81325   | 1 | 0.3011 |
| Spanish American | A:B | 3101:1507 | 0.00179 | 1 | 0.00173  | 1        | 28.41935  | 1 | 0.0341 |
| Spanish American | A:B | 3002:3501 | 0.00179 | 1 | -0.00006 | -0.0346  | 0.00136   | 1 | 1.0358 |
| Spanish American | A:B | 0204:1801 | 0.00179 | 1 | 0.00143  | 0.21038  | 3.37521   | 1 | 0.2007 |
| Spanish American | A:B | 3002:1402 | 0.00179 | 1 | 0.00097  | 0.03734  | 0.68388   | 1 | 0.457  |
| Spanish American | A:B | 0101:3905 | 0.00179 | 1 | 0.00017  | 0.00872  | 0.01146   | 1 | 0.9032 |
| Spanish American | A:B | 0301:5701 | 0.00179 | 1 | 0.00071  | 0.06218  | 0.29126   | 1 | 0.6022 |
| Spanish American | A:B | 3002:1516 | 0.00179 | 1 | 0.00152  | 0.17486  | 4.90925   | 1 | 0.1523 |
| Spanish American | A:B | 0222:3501 | 0.00179 | 1 | 0.00168  | 1        | 15.43943  | 1 | 0.0609 |
| Spanish American | A:B | 0217:3504 | 0.00179 | 1 | 0.00178  | 1        | 138.74865 | 1 | 0.0072 |
| Spanish American | A:B | 0101:5701 | 0.00179 | 1 | 0.00085  | 0.07309  | 0.46526   | 1 | 0.5269 |
| Spanish American | A:B | 0201:1517 | 0.00179 | 1 | 0.00102  | 0.36301  | 0.96545   | 1 | 0.4301 |
| Spanish American | A:B | 0201:1402 | 0.00179 | 1 | -0.00399 | -0.69    | 2.01062   | 1 | 3.2258 |
| Spanish American | A:B | 6602:5801 | 0.00179 | 1 | 0.00176  | 1        | 54.89838  | 1 | 0.0179 |
| Spanish American | A:B | 0204:3905 | 0.00179 | 1 | 0.00164  | 0.23352  | 9.99611   | 1 | 0.086  |
| Spanish American | A:B | 2301:3906 | 0.00179 | 1 | 0.00115  | 0.08396  | 1.21978   | 1 | 0.3584 |

|                  |     |           |         |   |          |          |          |   |        |
|------------------|-----|-----------|---------|---|----------|----------|----------|---|--------|
| Spanish American | A:B | 1105:5401 | 0.00179 | 1 | 0.00179  | 1        | 558      | 1 | 0.0018 |
| Spanish American | A:B | 3201:4002 | 0.00179 | 1 | 0.00136  | 0.0975   | 2.45561  | 1 | 0.2437 |
| Spanish American | A:B | 2601:1501 | 0.00179 | 1 | 0.00092  | 0.03556  | 0.5846   | 1 | 0.4839 |
| Spanish American | A:B | 3001:1517 | 0.00179 | 1 | 0.00172  | 0.48901  | 21.83927 | 1 | 0.043  |
| Spanish American | A:B | 2902:4001 | 0.00179 | 1 | 0.00095  | 0.06238  | 0.64935  | 1 | 0.4677 |
| Spanish American | A:B | 3303:8101 | 0.00179 | 1 | 0.00173  | 0.24322  | 26.3593  | 1 | 0.0358 |
| Spanish American | A:B | 6802:1402 | 0.00179 | 1 | 0.00145  | 0.11918  | 3.64494  | 1 | 0.1882 |
| Spanish American | A:B | 2501:5702 | 0.00179 | 1 | 0.00177  | 1        | 68.87343 | 1 | 0.0143 |
| Spanish American | A:B | 2301:5801 | 0.00179 | 1 | 0.00099  | 0.05779  | 0.72492  | 1 | 0.448  |
| Spanish American | A:B | 6802:1401 | 0.00179 | 1 | 0.0017   | 0.24047  | 18.33862 | 1 | 0.0502 |
| Spanish American | A:B | 2305:0702 | 0.00179 | 1 | 0.0017   | 1        | 17.6316  | 1 | 0.0538 |
| Spanish American | A:B | 2402:3543 | 0.00179 | 1 | 0.00143  | 0.44422  | 3.55065  | 1 | 0.2007 |
| Spanish American | A:B | 3301:2705 | 0.00179 | 1 | 0.00125  | 0.05974  | 1.70084  | 1 | 0.3011 |
| Spanish American | A:B | 3101:1516 | 0.00179 | 1 | 0.00149  | 0.1718   | 4.22434  | 1 | 0.1703 |
| Spanish American | A:B | 3101:1501 | 0.00179 | 1 | 0.00069  | 0.02226  | 0.26154  | 1 | 0.6129 |
| Spanish American | A:B | 3004:1501 | 0.00179 | 1 | 0.00162  | 0.31111  | 8.7582   | 1 | 0.0968 |
| Spanish American | A:B | 2402:0801 | 0.00179 | 1 | -0.00432 | -0.70693 | 2.01847  | 1 | 3.4122 |
| Spanish American | A:B | 6802:1503 | 0.00179 | 1 | 0.00157  | 0.12722  | 6.287    | 1 | 0.1254 |
| Spanish American | A:B | 3004:0702 | 0.00179 | 1 | 0.0015   | 0.29545  | 4.634    | 1 | 0.1613 |
| Spanish American | A:B | 0101:5301 | 0.00179 | 1 | 0.00017  | 0.00872  | 0.01146  | 1 | 0.9032 |
| Spanish American | A:B | 3002:1503 | 0.00179 | 1 | 0.00125  | 0.07172  | 1.66675  | 1 | 0.3047 |
| Spanish American | A:B | 2601:5501 | 0.00179 | 1 | 0.0015   | 0.14365  | 4.53048  | 1 | 0.1613 |
| Spanish American | A:B | 0201:5501 | 0.00179 | 1 | -0.00052 | -0.225   | 0.08412  | 1 | 1.2903 |
| Spanish American | A:B | 2902:4901 | 0.00179 | 1 | 0.00067  | 0.03308  | 0.24482  | 1 | 0.6237 |
| Spanish American | A:B | 7401:4801 | 0.00179 | 1 | 0.00168  | 0.18984  | 14.31175 | 1 | 0.0627 |
| Spanish American | A:B | 3301:5001 | 0.00179 | 1 | 0.00121  | 0.05317  | 1.46199  | 1 | 0.3262 |
| Spanish American | A:B | 2403:0702 | 0.00179 | 1 | 0.0016   | 0.47159  | 7.85657  | 1 | 0.1075 |
| Spanish American | A:B | 0205:4004 | 0.00179 | 1 | 0.00164  | 0.23352  | 9.99611  | 1 | 0.086  |
| Spanish American | A:B | 0205:4101 | 0.00179 | 1 | 0.0016   | 0.18242  | 7.63878  | 1 | 0.1075 |
| Spanish American | A:B | 3201:4101 | 0.00179 | 1 | 0.00166  | 0.18836  | 12.30682 | 1 | 0.0717 |
| Spanish American | A:B | 0205:5703 | 0.00179 | 1 | 0.00156  | 0.14835  | 6.07355  | 1 | 0.129  |
| Spanish American | A:B | 2403:3501 | 0.00179 | 1 | 0.00157  | 0.46756  | 6.76256  | 1 | 0.1219 |

|                  |     |           |         |   |          |          |           |   |        |
|------------------|-----|-----------|---------|---|----------|----------|-----------|---|--------|
| Spanish American | A:B | 0101:3508 | 0.00179 | 1 | 0.00166  | 1        | 12.30777  | 1 | 0.0753 |
| Spanish American | A:B | 2601:2705 | 0.00179 | 1 | 0.00121  | 0.05801  | 1.49401   | 1 | 0.3226 |
| Spanish American | A:B | 0217:1540 | 0.00179 | 1 | 0.00178  | 1        | 138.74865 | 1 | 0.0072 |
| Spanish American | A:B | 1101:3920 | 0.00179 | 1 | 0.00169  | 1        | 17.03052  | 1 | 0.0556 |
| Spanish American | A:B | 2402:5301 | 0.00179 | 1 | -0.00037 | -0.16964 | 0.03937   | 1 | 1.2043 |
| Spanish American | A:B | 7401:2705 | 0.00179 | 1 | 0.0016   | 0.18242  | 7.63878   | 1 | 0.1075 |
| Spanish American | A:B | 0101:1401 | 0.00179 | 1 | 0.00125  | 0.18895  | 1.76724   | 1 | 0.3011 |
| Spanish American | A:B | 0301:3512 | 0.00179 | 1 | 0.0004   | 0.02745  | 0.07324   | 1 | 0.7742 |
| Spanish American | A:B | 6801:1518 | 0.00179 | 1 | 0.00158  | 0.30597  | 6.87959   | 1 | 0.1183 |
| Spanish American | A:B | 0204:5701 | 0.00179 | 1 | 0.0017   | 0.24047  | 18.33862  | 1 | 0.0502 |
| Spanish American | A:B | 7401:8101 | 0.00179 | 1 | 0.00171  | 0.19277  | 20.73473  | 1 | 0.0448 |
| Spanish American | A:B | 3303:5801 | 0.00179 | 1 | 0.00166  | 0.23631  | 12.32944  | 1 | 0.0717 |
| Spanish American | A:B | 2501:5701 | 0.00179 | 1 | 0.00161  | 0.13039  | 8.28589   | 1 | 0.1004 |
| Spanish American | A:B | 0201:4101 | 0.00179 | 1 | -0.00013 | -0.07    | 0.00677   | 1 | 1.0753 |
| Spanish American | A:B | 8001:4403 | 0.00179 | 1 | 0.0014   | 0.28046  | 2.99174   | 1 | 0.2204 |
| Spanish American | A:B | 0217:3505 | 0.00179 | 1 | 0.00177  | 0.49639  | 68.49913  | 1 | 0.0143 |
| Spanish American | A:B | 0201:4005 | 0.00179 | 1 | 0.00141  | 1        | 3.65655   | 1 | 0.2151 |
| Spanish American | A:B | 0201:4201 | 0.00179 | 1 | 0.00102  | 0.36301  | 0.96545   | 1 | 0.4301 |
| Spanish American | A:B | 3002:1804 | 0.00179 | 1 | 0.00174  | 1        | 31.88066  | 1 | 0.0305 |
| Spanish American | A:B | 0211:3905 | 0.00179 | 1 | 0.00164  | 0.23352  | 9.99611   | 1 | 0.086  |
| Spanish American | A:B | 3002:7801 | 0.00179 | 1 | 0.00163  | 0.31238  | 9.36677   | 1 | 0.0914 |
| Spanish American | A:B | 1101:2702 | 0.00179 | 1 | 0.00159  | 0.47059  | 7.5565    | 1 | 0.1111 |
| Spanish American | A:B | 3201:5801 | 0.00179 | 1 | 0.00154  | 0.10903  | 5.28758   | 1 | 0.1434 |
| Spanish American | A:B | 6801:4004 | 0.00179 | 1 | 0.00151  | 0.21922  | 4.71707   | 1 | 0.1577 |
| Spanish American | A:B | 2402:4501 | 0.00179 | 1 | 0.00053  | 0.04724  | 0.14181   | 1 | 0.7025 |
| Spanish American | A:B | 2402:5703 | 0.00179 | 1 | 0.00071  | 0.07371  | 0.29536   | 1 | 0.6022 |
| Spanish American | A:B | 0102:5703 | 0.00179 | 1 | 0.00177  | 1        | 92.16517  | 1 | 0.0108 |
| Spanish American | A:B | 3101:5703 | 0.00179 | 1 | 0.00143  | 0.13729  | 3.24315   | 1 | 0.2043 |
| Spanish American | A:B | 3001:4002 | 0.00179 | 1 | 0.00114  | 0.05453  | 1.16043   | 1 | 0.3656 |
| Spanish American | A:B | 3001:5001 | 0.00179 | 1 | 0.00129  | 0.06147  | 1.94255   | 1 | 0.2796 |
| Spanish American | A:B | 3303:1801 | 0.00179 | 1 | 0.00143  | 0.21038  | 3.37521   | 1 | 0.2007 |
| Spanish American | A:B | 0204:4403 | 0.00179 | 1 | 0.00127  | 0.19052  | 1.84409   | 1 | 0.2939 |

|                  |     |           |         |   |         |         |          |   |        |
|------------------|-----|-----------|---------|---|---------|---------|----------|---|--------|
| Spanish American | A:B | 3004:4002 | 0.00179 | 1 | 0.00163 | 0.31238 | 9.36677  | 1 | 0.0914 |
| Spanish American | A:B | 0302:0702 | 0.00179 | 1 | 0.0017  | 1       | 17.6316  | 1 | 0.0538 |
| Spanish American | A:B | 2402:3902 | 0.00179 | 1 | 0.00143 | 0.44422 | 3.55065  | 1 | 0.2007 |
| Spanish American | A:B | 2301:2702 | 0.00179 | 1 | 0.00163 | 0.47655 | 9.71828  | 1 | 0.0896 |
| Spanish American | A:B | 3101:3905 | 0.00179 | 1 | 0.00106 | 0.05102 | 0.90562  | 1 | 0.4086 |
| Spanish American | A:B | 3101:2705 | 0.00179 | 1 | 0.00106 | 0.05102 | 0.90562  | 1 | 0.4086 |
| Spanish American | A:B | 3001:1516 | 0.00179 | 1 | 0.0016  | 0.18242 | 7.63878  | 1 | 0.1075 |
| Spanish American | A:B | 3301:5802 | 0.00179 | 1 | 0.00166 | 0.31618 | 11.71635 | 1 | 0.0753 |
| Spanish American | A:B | 0201:5601 | 0.00179 | 1 | 0.00064 | 0.15068 | 0.24997  | 1 | 0.6452 |
| Spanish American | A:B | 0213:3502 | 0.00179 | 1 | 0.00177 | 1       | 92.16517 | 1 | 0.0108 |
| Spanish American | A:B | 7401:4101 | 0.00179 | 1 | 0.00171 | 0.19277 | 20.73473 | 1 | 0.0448 |
| Spanish American | A:B | 2301:1515 | 0.00179 | 1 | 0.00123 | 0.10265 | 1.59263  | 1 | 0.3136 |
| Spanish American | A:B | 0201:5002 | 0.00179 | 1 | 0.00102 | 0.36301 | 0.96545  | 1 | 0.4301 |
| Spanish American | A:B | 3001:4201 | 0.00179 | 1 | 0.00172 | 0.48901 | 21.83927 | 1 | 0.043  |
| Spanish American | A:B | 2402:3531 | 0.00179 | 1 | 0.00161 | 1       | 8.98038  | 1 | 0.1004 |
| Spanish American | A:B | 0205:1302 | 0.00179 | 1 | 0.00145 | 0.09158 | 3.49036  | 1 | 0.1935 |
| Spanish American | A:B | 3101:5501 | 0.00179 | 1 | 0.00143 | 0.13729 | 3.24315  | 1 | 0.2043 |
| Spanish American | A:B | 3002:5301 | 0.00179 | 1 | 0.00114 | 0.05453 | 1.16043  | 1 | 0.3656 |
| Spanish American | A:B | 3001:0705 | 0.00179 | 1 | 0.00172 | 0.48901 | 21.83927 | 1 | 0.043  |
| Spanish American | A:B | 0217:5701 | 0.00179 | 1 | 0.0017  | 0.24047 | 18.33862 | 1 | 0.0502 |
| Spanish American | A:B | 3002:5703 | 0.00179 | 1 | 0.00146 | 0.14048 | 3.80914  | 1 | 0.1828 |
| Spanish American | A:B | 0211:5101 | 0.00179 | 1 | 0.00139 | 0.20588 | 2.90316  | 1 | 0.2222 |
| Spanish American | A:B | 3402:4403 | 0.00179 | 1 | 0.00153 | 0.46035 | 5.36375  | 1 | 0.147  |
| Spanish American | A:B | 3001:5801 | 0.00179 | 1 | 0.00141 | 0.08022 | 2.98145  | 1 | 0.2151 |
| Spanish American | A:B | 3303:5703 | 0.00179 | 1 | 0.00172 | 0.24185 | 21.67987 | 1 | 0.043  |
| Spanish American | A:B | 0201:3902 | 0.00179 | 1 | 0.00102 | 0.36301 | 0.96545  | 1 | 0.4301 |
| Spanish American | A:B | 3402:5301 | 0.00179 | 1 | 0.00172 | 0.48901 | 21.83927 | 1 | 0.043  |
| Spanish American | A:B | 0202:1516 | 0.00179 | 1 | 0.00176 | 0.49548 | 54.49986 | 1 | 0.0179 |
| Spanish American | A:B | 2301:2703 | 0.00179 | 1 | 0.00171 | 1       | 21.35828 | 1 | 0.0448 |
| Spanish American | A:B | 6901:4901 | 0.00179 | 1 | 0.00175 | 1       | 45.58169 | 1 | 0.0215 |
| Spanish American | A:B | 0206:3512 | 0.00179 | 1 | 0.00119 | 0.07635 | 1.36357  | 1 | 0.3387 |
| Spanish American | A:B | 0206:4101 | 0.00179 | 1 | 0.00145 | 0.16872 | 3.67233  | 1 | 0.1882 |



|                  |     |           |         |      |          |          |           |          |         |
|------------------|-----|-----------|---------|------|----------|----------|-----------|----------|---------|
| Spanish American | A:B | 2301:3505 | 0.00179 | 1    | 0.00163  | 0.47655  | 9.71828   | 1        | 0.0896  |
| Spanish American | A:B | 0205:1503 | 0.00179 | 1    | 0.00141  | 0.08022  | 2.98145   | 1        | 0.2151  |
| Spanish American | A:B | 0301:3502 | 0.00179 | 1    | 0.00087  | 0.08824  | 0.50172   | 1        | 0.5161  |
| Spanish American | A:B | 7401:5108 | 0.00179 | 1    | 0.00178  | 1        | 110.79856 | 1        | 0.009   |
| Spanish American | A:B | 2301:0705 | 0.00179 | 1    | 0.00163  | 0.47655  | 9.71828   | 1        | 0.0896  |
| Spanish American | A:B | 3201:5002 | 0.00179 | 1    | 0.00174  | 0.49273  | 33.50235  | 1        | 0.0287  |
| Spanish American | A:B | 3201:0801 | 0.00179 | 1    | 0.00092  | 0.06823  | 0.58224   | 1        | 0.4875  |
| Spanish American | A:B | 0206:3543 | 0.00179 | 1    | 0.00166  | 0.48045  | 11.84767  | 1        | 0.0753  |
| Spanish American | A:B | 6801:1515 | 0.00179 | 1    | 0.0013   | 0.10767  | 2.00216   | 0.99995  | 0.276   |
| Spanish American | A:B | 0101:1302 | 0.00156 | 0.9  | 0.00035  | 0.02318  | 0.06039   | 0.87035  | 0.6774  |
| Spanish American | A:B | 2402:4403 | 0.00131 | 0.7  | -0.00607 | -0.82284 | 3.3423    | 0.72895  | 4.1147  |
| Spanish American | A:C | 0101:0701 | 0.03568 | 19.9 | 0.02665  | 0.40231  | 53.87254  | 19.91127 | 5.043   |
| Spanish American | A:C | 0201:0702 | 0.03563 | 19.9 | 0.0125   | 0.14812  | 5.38387   | 19.87935 | 12.9032 |
| Spanish American | A:C | 2902:1601 | 0.03339 | 18.6 | 0.03032  | 0.61999  | 187.06365 | 18.63141 | 1.7151  |
| Spanish American | A:C | 0201:0501 | 0.03193 | 17.8 | 0.02075  | 0.50871  | 28.89467  | 17.81665 | 6.2366  |
| Spanish American | A:C | 0201:0701 | 0.02824 | 15.8 | 0.00242  | 0.02569  | 0.18338   | 15.75953 | 14.4086 |
| Spanish American | A:C | 2402:0401 | 0.02672 | 14.9 | 0.01125  | 0.13253  | 6.0004    | 14.90859 | 8.6308  |
| Spanish American | A:C | 0201:0602 | 0.02383 | 13.3 | 0.0061   | 0.09424  | 1.62527   | 13.29541 | 9.8925  |
| Spanish American | A:C | 0301:0702 | 0.01944 | 10.8 | 0.01019  | 0.13272  | 7.67791   | 10.84676 | 5.1613  |
| Spanish American | A:C | 0201:0304 | 0.01901 | 10.6 | 0.00629  | 0.13544  | 2.34844   | 10.60512 | 7.0968  |
| Spanish American | A:C | 1101:0401 | 0.01687 | 9.4  | 0.00831  | 0.17677  | 5.62939   | 9.41316  | 4.7778  |
| Spanish American | A:C | 2301:0401 | 0.01503 | 8.4  | 0.00813  | 0.21441  | 6.60358   | 8.38716  | 3.853   |
| Spanish American | A:C | 6801:0304 | 0.01434 | 8    | 0.01201  | 0.32364  | 38.16384  | 8        | 1.3011  |
| Spanish American | A:C | 0301:0602 | 0.01429 | 8    | 0.0072   | 0.09556  | 4.8645    | 7.97478  | 3.957   |
| Spanish American | A:C | 3301:0802 | 0.01254 | 7    | 0.01174  | 0.48333  | 100.64173 | 7        | 0.4516  |
| Spanish American | A:C | 0201:0401 | 0.01239 | 6.9  | -0.02076 | -0.62633 | 10.92692  | 6.91097  | 18.4946 |
| Spanish American | A:C | 2402:0202 | 0.011   | 6.1  | 0.00669  | 0.1728   | 6.71298   | 6.13963  | 2.4086  |
| Spanish American | A:C | 0201:0303 | 0.01075 | 6    | 0.00613  | 0.36301  | 5.89877   | 6        | 2.5806  |
| Spanish American | A:C | 2402:0701 | 0.01042 | 5.8  | -0.00163 | -0.13511 | 0.15506   | 5.81552  | 6.724   |
| Spanish American | A:C | 0205:0701 | 0.01039 | 5.8  | 0.00781  | 0.41252  | 15.29384  | 5.7967   | 1.4409  |
| Spanish American | A:C | 0301:0401 | 0.01034 | 5.8  | -0.00291 | -0.21983 | 0.46243   | 5.77157  | 7.3978  |
| Spanish American | A:C | 0201:0102 | 0.01034 | 5.8  | 0.00032  | 0.00863  | 0.00742   | 5.76758  | 5.5914  |

|                  |     |           |         |     |          |          |          |         |        |
|------------------|-----|-----------|---------|-----|----------|----------|----------|---------|--------|
| Spanish American | A:C | 0101:0602 | 0.01028 | 5.7 | 0.00408  | 0.05901  | 1.76056  | 5.73661 | 3.4624 |
| Spanish American | A:C | 2402:0102 | 0.01006 | 5.6 | 0.00538  | 0.12835  | 4.02722  | 5.61152 | 2.6093 |
| Spanish American | A:C | 0301:1203 | 0.00997 | 5.6 | 0.00581  | 0.13138  | 5.20357  | 5.56474 | 2.3226 |
| Spanish American | A:C | 2601:1203 | 0.0097  | 5.4 | 0.00839  | 0.32815  | 32.64421 | 5.40991 | 0.7258 |
| Spanish American | A:C | 0206:0102 | 0.00966 | 5.4 | 0.0079   | 0.22026  | 21.662   | 5.38848 | 0.9785 |
| Spanish American | A:C | 0101:0401 | 0.00962 | 5.4 | -0.00198 | -0.17068 | 0.24107  | 5.3683  | 6.4731 |
| Spanish American | A:C | 6803:0702 | 0.00896 | 5   | 0.0078   | 0.81325  | 33.29476 | 5       | 0.6452 |
| Spanish American | A:C | 3002:0501 | 0.00896 | 5   | 0.00738  | 0.25542  | 20.86682 | 5       | 0.8835 |
| Spanish American | A:C | 3001:0602 | 0.00896 | 5   | 0.00719  | 0.36426  | 18.11143 | 5       | 0.9892 |
| Spanish American | A:C | 2402:1502 | 0.00896 | 5   | 0.0059   | 0.21537  | 7.291    | 5       | 1.7061 |
| Spanish American | A:C | 1101:0202 | 0.00859 | 4.8 | 0.0062   | 0.15256  | 9.92233  | 4.79128 | 1.3333 |
| Spanish American | A:C | 2402:1203 | 0.00811 | 4.5 | 0.00326  | 0.07485  | 1.42494  | 4.5278  | 2.7097 |
| Spanish American | A:C | 2902:0401 | 0.00771 | 4.3 | -0.0003  | -0.03792 | 0.00801  | 4.30004 | 4.4695 |
| Spanish American | A:C | 2402:0602 | 0.00763 | 4.3 | -0.00064 | -0.07719 | 0.03333  | 4.26012 | 4.6165 |
| Spanish American | A:C | 3101:0401 | 0.00751 | 4.2 | 0.00226  | 0.07859  | 0.66669  | 4.19131 | 2.9283 |
| Spanish American | A:C | 0206:0702 | 0.00741 | 4.1 | 0.00337  | 0.10023  | 1.81936  | 4.13649 | 2.2581 |
| Spanish American | A:C | 1101:0701 | 0.00739 | 4.1 | 0.00072  | 0.01478  | 0.05257  | 4.12547 | 3.7222 |
| Spanish American | A:C | 6801:0401 | 0.00717 | 4   | 0.00109  | 0.03274  | 0.13476  | 4       | 3.3907 |
| Spanish American | A:C | 0206:0801 | 0.00717 | 4   | 0.00656  | 0.42272  | 41.79867 | 4       | 0.3387 |
| Spanish American | A:C | 3201:0401 | 0.00717 | 4   | 0.00496  | 0.4089   | 7.44793  | 4       | 1.233  |
| Spanish American | A:C | 3002:0401 | 0.00717 | 4   | 0.00247  | 0.09596  | 0.88619  | 4       | 2.6201 |
| Spanish American | A:C | 0201:1402 | 0.00717 | 4   | 0.00331  | 0.23562  | 2.06328  | 4       | 2.1505 |
| Spanish American | A:C | 0201:1203 | 0.00716 | 4   | -0.00325 | -0.31205 | 0.75695  | 3.99454 | 5.8065 |
| Spanish American | A:C | 2301:0702 | 0.00706 | 3.9 | 0.00224  | 0.056    | 0.68123  | 3.93763 | 2.6882 |
| Spanish American | A:C | 2501:1203 | 0.00658 | 3.7 | 0.00589  | 0.43148  | 29.71817 | 3.67194 | 0.3871 |
| Spanish American | A:C | 0101:1601 | 0.00631 | 3.5 | 0.00186  | 0.03392  | 0.49581  | 3.519   | 2.4839 |
| Spanish American | A:C | 2601:0602 | 0.00609 | 3.4 | 0.00388  | 0.15722  | 4.24108  | 3.4005  | 1.2366 |
| Spanish American | A:C | 1101:0102 | 0.00601 | 3.4 | 0.00343  | 0.07785  | 2.80962  | 3.35606 | 1.4444 |
| Spanish American | A:C | 3101:0702 | 0.00583 | 3.3 | 0.00217  | 0.0713   | 0.82999  | 3.25207 | 2.043  |
| Spanish American | A:C | 1101:0304 | 0.0057  | 3.2 | 0.00241  | 0.04619  | 1.11396  | 3.18045 | 1.8333 |
| Spanish American | A:C | 3301:1601 | 0.00538 | 3   | 0.00389  | 0.1649   | 6.21211  | 3       | 0.828  |
| Spanish American | A:C | 3101:0501 | 0.00538 | 3   | 0.00361  | 0.11173  | 4.47917  | 3       | 0.9875 |

|                  |     |           |         |     |          |          |          |         |        |
|------------------|-----|-----------|---------|-----|----------|----------|----------|---------|--------|
| Spanish American | A:C | 0201:0210 | 0.00538 | 3   | 0.00152  | 0.10822  | 0.43527  | 3       | 2.1505 |
| Spanish American | A:C | 2402:0305 | 0.00538 | 3   | 0.0043   | 0.44422  | 10.72913 | 3       | 0.6022 |
| Spanish American | A:C | 2601:0701 | 0.00538 | 3   | 0.00215  | 0.09084  | 0.93205  | 3       | 1.8011 |
| Spanish American | A:C | 3004:0701 | 0.00538 | 3   | 0.00473  | 1        | 22.10391 | 3       | 0.3602 |
| Spanish American | A:C | 0205:0602 | 0.00538 | 3   | 0.0036   | 0.18262  | 4.55217  | 3       | 0.9892 |
| Spanish American | A:C | 0206:0401 | 0.00538 | 3   | -0.00042 | -0.07309 | 0.02124  | 3       | 3.2366 |
| Spanish American | A:C | 0301:0202 | 0.00534 | 3   | 0.00164  | 0.04172  | 0.46379  | 2.97967 | 2.0645 |
| Spanish American | A:C | 2301:0210 | 0.0051  | 2.8 | 0.0043   | 0.25102  | 13.67858 | 2.84572 | 0.448  |
| Spanish American | A:C | 2402:0702 | 0.0049  | 2.7 | -0.00589 | -0.54549 | 2.2316   | 2.73683 | 6.0215 |
| Spanish American | A:C | 0201:1601 | 0.00486 | 2.7 | -0.00786 | -0.61784 | 3.6681   | 2.71213 | 7.0968 |
| Spanish American | A:C | 2301:0701 | 0.00442 | 2.5 | -0.00096 | -0.17754 | 0.11257  | 2.46887 | 3.0018 |
| Spanish American | A:C | 0301:0802 | 0.0043  | 2.4 | 0.00153  | 0.05182  | 0.53071  | 2.40093 | 1.5484 |
| Spanish American | A:C | 2601:0401 | 0.00392 | 2.2 | -0.00022 | -0.05288 | 0.00785  | 2.18959 | 2.3118 |
| Spanish American | A:C | 0201:1502 | 0.00379 | 2.1 | -0.00276 | -0.42183 | 0.85482  | 2.11373 | 3.6559 |
| Spanish American | A:C | 0201:1509 | 0.00358 | 2   | 0.00243  | 0.57535  | 3.64429  | 2.00001 | 0.6452 |
| Spanish American | A:C | 3001:0701 | 0.00358 | 2   | 0.001    | 0.05295  | 0.25201  | 2       | 1.4409 |
| Spanish American | A:C | 3201:0701 | 0.00358 | 2   | 0.00186  | 0.14766  | 1.29682  | 2       | 0.9606 |
| Spanish American | A:C | 6801:1402 | 0.00358 | 2   | 0.00288  | 0.16716  | 6.93238  | 2       | 0.3943 |
| Spanish American | A:C | 0201:0302 | 0.00358 | 2   | 0.00166  | 0.23562  | 1.02231  | 2       | 1.0753 |
| Spanish American | A:C | 0211:0304 | 0.00358 | 2   | 0.00316  | 0.46857  | 14.07283 | 2       | 0.2366 |
| Spanish American | A:C | 0217:0305 | 0.00358 | 2   | 0.00351  | 0.49457  | 90.66077 | 2       | 0.043  |
| Spanish American | A:C | 0301:0303 | 0.00358 | 2   | 0.00173  | 0.08824  | 1.01446  | 2       | 1.0323 |
| Spanish American | A:C | 3303:1801 | 0.00358 | 2   | 0.00347  | 0.4918   | 59.4425  | 2       | 0.0645 |
| Spanish American | A:C | 6802:0802 | 0.00358 | 2   | 0.00318  | 0.2619   | 14.58776 | 2       | 0.2258 |
| Spanish American | A:C | 3301:0202 | 0.00358 | 2   | 0.00251  | 0.10433  | 3.47812  | 2       | 0.6022 |
| Spanish American | A:C | 6801:0801 | 0.00358 | 2   | 0.00295  | 0.1903   | 8.07081  | 2       | 0.3548 |
| Spanish American | A:C | 7401:0304 | 0.00358 | 2   | 0.00305  | 0.36229  | 10.53481 | 2       | 0.2957 |
| Spanish American | A:C | 6802:0401 | 0.00358 | 2   | 0.00165  | 0.15557  | 0.94161  | 2       | 1.0789 |
| Spanish American | A:C | 2902:1502 | 0.00358 | 2   | 0.002    | 0.06928  | 1.53501  | 2       | 0.8835 |
| Spanish American | A:C | 3402:0401 | 0.00358 | 2   | 0.00303  | 1        | 11.01623 | 2       | 0.3082 |
| Spanish American | A:C | 0101:1202 | 0.00358 | 2   | 0.00304  | 0.4593   | 10.44196 | 2       | 0.3011 |
| Spanish American | A:C | 3101:0303 | 0.00358 | 2   | 0.00285  | 0.13729  | 6.55758  | 2       | 0.4086 |

|                  |     |           |         |     |          |          |          |         |        |
|------------------|-----|-----------|---------|-----|----------|----------|----------|---------|--------|
| Spanish American | A:C | 6801:0704 | 0.0035  | 2   | 0.003    | 0.24904  | 10.71154 | 1.95052 | 0.276  |
| Spanish American | A:C | 3101:1502 | 0.00338 | 1.9 | 0.00234  | 0.07962  | 3.15315  | 1.88627 | 0.5789 |
| Spanish American | A:C | 8001:0802 | 0.00336 | 1.9 | 0.00319  | 0.61331  | 34.03649 | 1.87735 | 0.0968 |
| Spanish American | A:C | 1101:0602 | 0.00334 | 1.9 | -0.00124 | -0.27066 | 0.21603  | 1.86387 | 2.5556 |
| Spanish American | A:C | 2501:0401 | 0.00333 | 1.9 | 0.00112  | 0.09256  | 0.38167  | 1.85936 | 1.233  |
| Spanish American | A:C | 1101:1203 | 0.00328 | 1.8 | 0.00059  | 0.01298  | 0.08131  | 1.83108 | 1.5    |
| Spanish American | A:C | 0201:0802 | 0.00309 | 1.7 | -0.00385 | -0.55522 | 1.57093  | 1.72171 | 3.871  |
| Spanish American | A:C | 0301:0102 | 0.003   | 1.7 | -0.00101 | -0.25194 | 0.16291  | 1.67308 | 2.2366 |
| Spanish American | A:C | 0301:1601 | 0.00288 | 1.6 | -0.00221 | -0.43359 | 0.6206   | 1.60789 | 2.8387 |
| Spanish American | A:C | 0206:0202 | 0.00264 | 1.5 | 0.00102  | 0.02845  | 0.39305  | 1.47502 | 0.9032 |
| Spanish American | A:C | 3101:0202 | 0.00261 | 1.5 | 0.00114  | 0.03513  | 0.54009  | 1.45595 | 0.8172 |
| Spanish American | A:C | 2902:0702 | 0.00258 | 1.4 | -0.00301 | -0.53779 | 1.06592  | 1.4413  | 3.1183 |
| Spanish American | A:C | 0201:0202 | 0.00255 | 1.4 | -0.0067  | -0.72424 | 3.60393  | 1.42328 | 5.1613 |
| Spanish American | A:C | 2403:1601 | 0.00233 | 1.3 | 0.00212  | 0.62802  | 12.59466 | 1.30004 | 0.1183 |
| Spanish American | A:C | 0101:0702 | 0.0023  | 1.3 | -0.0058  | -0.71624 | 2.80723  | 1.28148 | 4.5161 |
| Spanish American | A:C | 2301:1601 | 0.0022  | 1.2 | -0.00045 | -0.16839 | 0.04665  | 1.22953 | 1.4785 |
| Spanish American | A:C | 3101:0304 | 0.00218 | 1.2 | 0.00016  | 0.00508  | 0.00806  | 1.2144  | 1.1237 |
| Spanish American | A:C | 0205:0102 | 0.00216 | 1.2 | 0.00115  | 0.0563   | 0.79542  | 1.20327 | 0.5591 |
| Spanish American | A:C | 0101:0501 | 0.00212 | 1.2 | -0.00179 | -0.45788 | 0.522    | 1.18334 | 2.1828 |
| Spanish American | A:C | 0301:0210 | 0.00203 | 1.1 | 0.00049  | 0.02964  | 0.09504  | 1.1311  | 0.8602 |
| Spanish American | A:C | 2301:0202 | 0.00203 | 1.1 | 0.0001   | 0.00244  | 0.00317  | 1.1311  | 1.0753 |
| Spanish American | A:C | 8001:0701 | 0.00201 | 1.1 | 0.00137  | 0.28882  | 1.84388  | 1.12265 | 0.3602 |
| Spanish American | A:C | 0301:0704 | 0.00188 | 1   | 0.0008   | 0.06992  | 0.36822  | 1.04948 | 0.6022 |
| Spanish American | A:C | 6801:0702 | 0.00188 | 1   | -0.00236 | -0.55635 | 0.85412  | 1.04948 | 2.3656 |
| Spanish American | A:C | 2902:0210 | 0.00183 | 1   | 0.0009   | 0.05311  | 0.52385  | 1.02318 | 0.5197 |
| Spanish American | A:C | 6801:0306 | 0.00179 | 1   | 0.00165  | 0.47948  | 11.24264 | 1       | 0.0789 |
| Spanish American | A:C | 0206:1502 | 0.00179 | 1   | 0.00065  | 0.02202  | 0.21736  | 1       | 0.6398 |
| Spanish American | A:C | 1101:0704 | 0.00179 | 1   | 0.0011   | 0.09244  | 1.02972  | 1       | 0.3889 |
| Spanish American | A:C | 3002:0702 | 0.00179 | 1   | -0.00148 | -0.45294 | 0.4334   | 1       | 1.828  |
| Spanish American | A:C | 6801:0501 | 0.00179 | 1   | -0.00026 | -0.12539 | 0.01974  | 1       | 1.1434 |
| Spanish American | A:C | 0301:1205 | 0.00179 | 1   | 0.00164  | 1        | 10.64408 | 1       | 0.086  |
| Spanish American | A:C | 6805:0702 | 0.00179 | 1   | 0.0016   | 1        | 8.3149   | 1       | 0.1075 |

|                  |     |           |         |   |          |          |          |   |        |
|------------------|-----|-----------|---------|---|----------|----------|----------|---|--------|
| Spanish American | A:C | 2601:0304 | 0.00179 | 1 | 0.0002   | 0.008    | 0.01569  | 1 | 0.8871 |
| Spanish American | A:C | 6802:1801 | 0.00179 | 1 | 0.00159  | 0.12881  | 7.17431  | 1 | 0.1129 |
| Spanish American | A:C | 0301:1402 | 0.00179 | 1 | 0.00025  | 0.01529  | 0.02531  | 1 | 0.8602 |
| Spanish American | A:C | 2425:0801 | 0.00179 | 1 | 0.00176  | 1        | 61.10952 | 1 | 0.0161 |
| Spanish American | A:C | 3601:1801 | 0.00179 | 1 | 0.00173  | 0.4918   | 29.61434 | 1 | 0.0323 |
| Spanish American | A:C | 3601:0401 | 0.00179 | 1 | 0.00124  | 0.4089   | 1.84189  | 1 | 0.3082 |
| Spanish American | A:C | 3001:1801 | 0.00179 | 1 | 0.00145  | 0.09158  | 3.49036  | 1 | 0.1935 |
| Spanish American | A:C | 0202:0702 | 0.00179 | 1 | 0.00141  | 0.43976  | 3.22179  | 1 | 0.2151 |
| Spanish American | A:C | 6803:0305 | 0.00179 | 1 | 0.00168  | 0.15761  | 13.861   | 1 | 0.0645 |
| Spanish American | A:C | 2301:0704 | 0.00179 | 1 | 0.00123  | 0.10265  | 1.59263  | 1 | 0.3136 |
| Spanish American | A:C | 3102:0306 | 0.00179 | 1 | 0.00179  | 1        | 278.4991 | 1 | 0.0036 |
| Spanish American | A:C | 2402:0704 | 0.00179 | 1 | 0.00053  | 0.04724  | 0.14181  | 1 | 0.7025 |
| Spanish American | A:C | 3101:0102 | 0.00179 | 1 | 0.00021  | 0.00633  | 0.01613  | 1 | 0.8853 |
| Spanish American | A:C | 0204:1502 | 0.00179 | 1 | 0.00157  | 0.22643  | 6.57371  | 1 | 0.1219 |
| Spanish American | A:C | 3002:0802 | 0.00179 | 1 | 0.00081  | 0.02745  | 0.39639  | 1 | 0.5484 |
| Spanish American | A:C | 1101:1202 | 0.00179 | 1 | 0.00139  | 0.20588  | 2.90316  | 1 | 0.2222 |
| Spanish American | A:C | 0301:1202 | 0.00179 | 1 | 0.00118  | 0.17941  | 1.37789  | 1 | 0.3441 |
| Spanish American | A:C | 0222:0401 | 0.00179 | 1 | 0.00152  | 1        | 5.49823  | 1 | 0.1541 |
| Spanish American | A:C | 0204:1602 | 0.00179 | 1 | 0.00173  | 0.24322  | 26.3593  | 1 | 0.0358 |
| Spanish American | A:C | 6801:1502 | 0.00179 | 1 | 0.00059  | 0.02019  | 0.1742   | 1 | 0.6703 |
| Spanish American | A:C | 1105:0102 | 0.00179 | 1 | 0.00171  | 1        | 20.49827 | 1 | 0.0466 |
| Spanish American | A:C | 3201:1502 | 0.00179 | 1 | 0.00136  | 0.0975   | 2.45561  | 1 | 0.2437 |
| Spanish American | A:C | 2301:0302 | 0.00179 | 1 | 0.00139  | 0.16248  | 2.83954  | 1 | 0.224  |
| Spanish American | A:C | 2305:0702 | 0.00179 | 1 | 0.0016   | 1        | 8.3149   | 1 | 0.1075 |
| Spanish American | A:C | 2501:1402 | 0.00179 | 1 | 0.00154  | 0.10903  | 5.28758  | 1 | 0.1434 |
| Spanish American | A:C | 3101:1602 | 0.00179 | 1 | 0.00149  | 0.1718   | 4.22434  | 1 | 0.1703 |
| Spanish American | A:C | 2402:0304 | 0.00179 | 1 | -0.00414 | -0.69805 | 1.90655  | 1 | 3.3118 |
| Spanish American | A:C | 6802:0210 | 0.00179 | 1 | 0.00157  | 0.12722  | 6.287    | 1 | 0.1254 |
| Spanish American | A:C | 0101:0802 | 0.00179 | 1 | -0.00064 | -0.2619  | 0.10385  | 1 | 1.3548 |
| Spanish American | A:C | 0301:1602 | 0.00179 | 1 | 0.00102  | 0.12471  | 0.83365  | 1 | 0.4301 |
| Spanish American | A:C | 3002:0210 | 0.00179 | 1 | 0.00125  | 0.07172  | 1.66675  | 1 | 0.3047 |
| Spanish American | A:C | 0206:0304 | 0.00179 | 1 | -0.00043 | -0.19481 | 0.05205  | 1 | 1.2419 |

|                  |     |           |         |   |          |          |          |   |        |
|------------------|-----|-----------|---------|---|----------|----------|----------|---|--------|
| Spanish American | A:C | 3301:0602 | 0.00179 | 1 | -0.00028 | -0.13354 | 0.02301  | 1 | 1.1541 |
| Spanish American | A:C | 3201:1701 | 0.00179 | 1 | 0.00166  | 0.18836  | 12.30682 | 1 | 0.0717 |
| Spanish American | A:C | 0301:1801 | 0.00179 | 1 | 0.0004   | 0.02745  | 0.07324  | 1 | 0.7742 |
| Spanish American | A:C | 3002:0701 | 0.00179 | 1 | -0.00187 | -0.5101  | 0.62256  | 1 | 2.0412 |
| Spanish American | A:C | 0101:0801 | 0.00179 | 1 | 0.00058  | 0.03876  | 0.16884  | 1 | 0.6774 |
| Spanish American | A:C | 0217:0303 | 0.00179 | 1 | 0.00164  | 0.23352  | 9.99611  | 1 | 0.086  |
| Spanish American | A:C | 7401:0202 | 0.00179 | 1 | 0.00141  | 0.16404  | 3.02089  | 1 | 0.2151 |
| Spanish American | A:C | 0204:0802 | 0.00179 | 1 | 0.00156  | 0.225    | 6.11886  | 1 | 0.129  |
| Spanish American | A:C | 7401:1801 | 0.00179 | 1 | 0.00165  | 0.18689  | 10.74877 | 1 | 0.0806 |
| Spanish American | A:C | 0101:0102 | 0.00179 | 1 | -0.00172 | -0.48901 | 0.5308   | 1 | 1.957  |
| Spanish American | A:C | 3303:0302 | 0.00179 | 1 | 0.00173  | 0.24322  | 26.3593  | 1 | 0.0358 |
| Spanish American | A:C | 2402:1701 | 0.00179 | 1 | 0.00089  | 0.11076  | 0.5548   | 1 | 0.5018 |
| Spanish American | A:C | 0201:1701 | 0.00179 | 1 | -0.00013 | -0.07    | 0.00677  | 1 | 1.0753 |
| Spanish American | A:C | 2402:1602 | 0.00179 | 1 | 0.00089  | 0.11076  | 0.5548   | 1 | 0.5018 |
| Spanish American | A:C | 0217:1601 | 0.00179 | 1 | 0.00137  | 0.20286  | 2.63761  | 1 | 0.2366 |
| Spanish American | A:C | 3002:1212 | 0.00179 | 1 | 0.00174  | 1        | 31.88066 | 1 | 0.0305 |
| Spanish American | A:C | 0211:0702 | 0.00179 | 1 | 0.00102  | 0.15964  | 0.85219  | 1 | 0.4301 |
| Spanish American | A:C | 3002:0704 | 0.00179 | 1 | 0.00141  | 0.11592  | 3.03157  | 1 | 0.2133 |
| Spanish American | A:C | 2301:0304 | 0.00179 | 1 | -0.00086 | -0.32364 | 0.17231  | 1 | 1.4785 |
| Spanish American | A:C | 0102:1801 | 0.00179 | 1 | 0.00176  | 1        | 61.10952 | 1 | 0.0161 |
| Spanish American | A:C | 3001:0202 | 0.00179 | 1 | 0.00087  | 0.04213  | 0.48443  | 1 | 0.5161 |
| Spanish American | A:C | 2501:0501 | 0.00179 | 1 | 0.00105  | 0.07703  | 0.87854  | 1 | 0.4158 |
| Spanish American | A:C | 3303:1203 | 0.00179 | 1 | 0.00145  | 0.21186  | 3.55657  | 1 | 0.1935 |
| Spanish American | A:C | 0204:0304 | 0.00179 | 1 | 0.00137  | 0.20286  | 2.63761  | 1 | 0.2366 |
| Spanish American | A:C | 0302:0702 | 0.00179 | 1 | 0.0016   | 1        | 8.3149   | 1 | 0.1075 |
| Spanish American | A:C | 3301:1402 | 0.00179 | 1 | 0.00134  | 0.07684  | 2.33603  | 1 | 0.2509 |
| Spanish American | A:C | 0213:1502 | 0.00179 | 1 | 0.00174  | 1        | 31.88066 | 1 | 0.0305 |
| Spanish American | A:C | 2301:1406 | 0.00179 | 1 | 0.00171  | 1        | 21.35828 | 1 | 0.0448 |
| Spanish American | A:C | 3001:1701 | 0.00179 | 1 | 0.0016   | 0.18242  | 7.63878  | 1 | 0.1075 |
| Spanish American | A:C | 3001:1505 | 0.00179 | 1 | 0.00172  | 0.48901  | 21.83927 | 1 | 0.043  |
| Spanish American | A:C | 3002:1801 | 0.00179 | 1 | 0.0013   | 0.08318  | 2.01411  | 1 | 0.2742 |
| Spanish American | A:C | 0211:1502 | 0.00179 | 1 | 0.00157  | 0.22643  | 6.57371  | 1 | 0.1219 |

|                  |        |           |         |      |          |          |           |          |         |
|------------------|--------|-----------|---------|------|----------|----------|-----------|----------|---------|
| Spanish American | A:C    | 3001:0302 | 0.00179 | 1    | 0.0016   | 0.18242  | 7.63878   | 1        | 0.1075  |
| Spanish American | A:C    | 0202:1402 | 0.00179 | 1    | 0.00173  | 0.49088  | 26.50412  | 1        | 0.0358  |
| Spanish American | A:C    | 6901:0401 | 0.00179 | 1    | 0.00152  | 1        | 5.49823   | 1        | 0.1541  |
| Spanish American | A:C    | 0206:1701 | 0.00179 | 1    | 0.00145  | 0.16872  | 3.67233   | 1        | 0.1882  |
| Spanish American | A:C    | 0205:1203 | 0.00179 | 1    | 0.00075  | 0.03672  | 0.32526   | 1        | 0.5806  |
| Spanish American | A:C    | 7401:1602 | 0.00179 | 1    | 0.00171  | 0.19277  | 20.73473  | 1        | 0.0448  |
| Spanish American | A:C    | 6802:1505 | 0.00179 | 1    | 0.00175  | 0.49365  | 38.50149  | 1        | 0.0251  |
| Spanish American | A:C    | 3002:0801 | 0.00179 | 1    | 0.0013   | 0.08318  | 2.01411   | 1        | 0.2742  |
| Spanish American | A:C    | 2301:0303 | 0.00179 | 1    | 0.00083  | 0.04034  | 0.42543   | 1        | 0.5376  |
| Spanish American | A:C    | 6602:0701 | 0.00179 | 1    | 0.00158  | 1        | 7.34148   | 1        | 0.1201  |
| Spanish American | A:C    | 2902:0304 | 0.00179 | 1    | -0.00128 | -0.41693 | 0.33424   | 1        | 1.7151  |
| Spanish American | A:C    | 0205:1509 | 0.00179 | 1    | 0.00168  | 0.31868  | 13.93737  | 0.99999  | 0.0645  |
| Spanish American | A:C    | 2403:0401 | 0.00125 | 0.7  | 0.0007   | 0.23154  | 0.5906    | 0.69996  | 0.3082  |
| Spanish American | A:C    | 2902:0202 | 0.00108 | 0.6  | -0.00115 | -0.5157  | 0.36563   | 0.60407  | 1.2473  |
| Spanish American | A:C    | 2501:0602 | 0.00084 | 0.5  | -0.00034 | -0.28931 | 0.06104   | 0.4687   | 0.6595  |
| Spanish American | A:C    | 1101:0702 | 0.00079 | 0.4  | -0.00519 | -0.86841 | 2.98236   | 0.43862  | 3.3333  |
| Spanish American | A:DRB1 | 0201:0301 | 0.0327  | 18.2 | 0.0142   | 0.21031  | 8.4781    | 18.24634 | 10.3226 |
| Spanish American | A:DRB1 | 2902:0701 | 0.0293  | 16.3 | 0.02306  | 0.50415  | 56.97747  | 16.34695 | 3.4821  |
| Spanish American | A:DRB1 | 0101:0301 | 0.02028 | 11.3 | 0.0138   | 0.20066  | 19.43116  | 11.31579 | 3.6129  |
| Spanish American | A:DRB1 | 0206:0802 | 0.01846 | 10.3 | 0.01657  | 0.46367  | 88.79964  | 10.30219 | 1.0538  |
| Spanish American | A:DRB1 | 0201:1301 | 0.01754 | 9.8  | 0.00559  | 0.12827  | 1.97126   | 9.78796  | 6.6667  |
| Spanish American | A:DRB1 | 0201:0701 | 0.01752 | 9.8  | -0.00831 | -0.32165 | 2.15825   | 9.77407  | 14.4086 |
| Spanish American | A:DRB1 | 0301:0701 | 0.01716 | 9.6  | 0.00683  | 0.0903   | 3.1381    | 9.57731  | 5.7634  |
| Spanish American | A:DRB1 | 0201:1501 | 0.01645 | 9.2  | 0.00257  | 0.05083  | 0.36293   | 9.17833  | 7.7419  |
| Spanish American | A:DRB1 | 1101:0101 | 0.01608 | 9    | 0.013    | 0.24771  | 34.23819  | 8.97453  | 1.7222  |
| Spanish American | A:DRB1 | 0201:0401 | 0.01559 | 8.7  | 0.01058  | 0.57835  | 16.25021  | 8.69738  | 2.7957  |
| Spanish American | A:DRB1 | 2402:0407 | 0.01509 | 8.4  | 0.00898  | 0.16374  | 8.70139   | 8.42053  | 3.4122  |
| Spanish American | A:DRB1 | 3002:0301 | 0.01434 | 8    | 0.01172  | 0.42076  | 32.9827   | 8        | 1.4624  |
| Spanish American | A:DRB1 | 3301:0102 | 0.01434 | 8    | 0.01335  | 0.55384  | 107.31758 | 8        | 0.552   |
| Spanish American | A:DRB1 | 0301:0101 | 0.01401 | 7.8  | 0.00923  | 0.18175  | 11.52016  | 7.81622  | 2.6667  |
| Spanish American | A:DRB1 | 2402:0404 | 0.01395 | 7.8  | 0.0091   | 0.209    | 11.10949  | 7.78625  | 2.7097  |
| Spanish American | A:DRB1 | 0201:0407 | 0.01384 | 7.7  | 0.00074  | 0.01544  | 0.03149   | 7.7238   | 7.3118  |

|                  |        |           |         |     |          |          |          |         |        |
|------------------|--------|-----------|---------|-----|----------|----------|----------|---------|--------|
| Spanish American | A:DRB1 | 2402:0701 | 0.01291 | 7.2 | 0.00086  | 0.00976  | 0.04348  | 7.2051  | 6.724  |
| Spanish American | A:DRB1 | 0101:1501 | 0.01283 | 7.2 | 0.00798  | 0.1337   | 8.45131  | 7.16057 | 2.7097 |
| Spanish American | A:DRB1 | 0201:1104 | 0.01254 | 7   | 0.00638  | 0.28339  | 4.82856  | 7       | 3.4409 |
| Spanish American | A:DRB1 | 0101:0701 | 0.01194 | 6.7 | 0.0029   | 0.04384  | 0.63984  | 6.66338 | 5.043  |
| Spanish American | A:DRB1 | 0301:1501 | 0.01135 | 6.3 | 0.0058   | 0.09838  | 3.95743  | 6.33381 | 3.0968 |
| Spanish American | A:DRB1 | 0201:1101 | 0.01092 | 6.1 | 0.00206  | 0.06355  | 0.3536   | 6.09353 | 4.9462 |
| Spanish American | A:DRB1 | 6803:0407 | 0.01075 | 6   | 0.0101   | 1        | 93.4757  | 6       | 0.3656 |
| Spanish American | A:DRB1 | 0201:0802 | 0.00995 | 5.6 | -0.00084 | -0.07785 | 0.04895  | 5.55271 | 6.0215 |
| Spanish American | A:DRB1 | 0206:0407 | 0.00973 | 5.4 | 0.00744  | 0.21044  | 14.89283 | 5.42948 | 1.2796 |
| Spanish American | A:DRB1 | 1101:0404 | 0.00896 | 5   | 0.00627  | 0.13725  | 9.08674  | 5       | 1.5    |
| Spanish American | A:DRB1 | 0201:0403 | 0.00896 | 5   | 0.00588  | 0.52226  | 8.08032  | 5       | 1.7204 |
| Spanish American | A:DRB1 | 0201:0101 | 0.0088  | 4.9 | -0.00315 | -0.2634  | 0.6239   | 4.91069 | 6.6667 |
| Spanish American | A:DRB1 | 3101:1402 | 0.00838 | 4.7 | 0.00789  | 0.56979  | 74.75201 | 4.67549 | 0.2724 |
| Spanish American | A:DRB1 | 6801:0802 | 0.0083  | 4.6 | 0.00632  | 0.1688   | 12.35239 | 4.63118 | 1.1039 |
| Spanish American | A:DRB1 | 2402:0802 | 0.00809 | 4.5 | 0.00305  | 0.06764  | 1.20908  | 4.51391 | 2.81   |
| Spanish American | A:DRB1 | 2301:0301 | 0.00767 | 4.3 | 0.00381  | 0.09308  | 2.40915  | 4.27731 | 2.1505 |
| Spanish American | A:DRB1 | 2402:1104 | 0.00717 | 4   | 0.00429  | 0.16633  | 4.08541  | 4       | 1.6057 |
| Spanish American | A:DRB1 | 1101:1301 | 0.00717 | 4   | 0.00408  | 0.0778   | 3.37739  | 4       | 1.7222 |
| Spanish American | A:DRB1 | 2601:1001 | 0.00717 | 4   | 0.00645  | 0.24641  | 33.88026 | 4       | 0.4032 |
| Spanish American | A:DRB1 | 1101:0102 | 0.00717 | 4   | 0.00498  | 0.13369  | 6.95886  | 4       | 1.2222 |
| Spanish American | A:DRB1 | 2301:0701 | 0.00717 | 4   | 0.00179  | 0.04538  | 0.39493  | 4       | 3.0018 |
| Spanish American | A:DRB1 | 0101:1302 | 0.00717 | 4   | 0.00474  | 0.15891  | 5.77087  | 4       | 1.3548 |
| Spanish American | A:DRB1 | 2501:1501 | 0.00688 | 3.8 | 0.00596  | 0.44406  | 23.20692 | 3.83943 | 0.5161 |
| Spanish American | A:DRB1 | 0205:1301 | 0.00682 | 3.8 | 0.00562  | 0.2768   | 15.97414 | 3.80378 | 0.6667 |
| Spanish American | A:DRB1 | 2301:1101 | 0.00667 | 3.7 | 0.00482  | 0.12254  | 7.68028  | 3.72269 | 1.0305 |
| Spanish American | A:DRB1 | 3001:0701 | 0.00641 | 3.6 | 0.00383  | 0.20234  | 3.67949  | 3.57738 | 1.4409 |
| Spanish American | A:DRB1 | 2902:1501 | 0.00625 | 3.5 | 0.0029   | 0.0596   | 1.57557  | 3.48786 | 1.871  |
| Spanish American | A:DRB1 | 3101:0701 | 0.00551 | 3.1 | 0.00142  | 0.04756  | 0.32604  | 3.07648 | 2.2814 |
| Spanish American | A:DRB1 | 0201:1302 | 0.00538 | 3   | -0.00156 | -0.225   | 0.25798  | 3       | 3.871  |
| Spanish American | A:DRB1 | 0201:1201 | 0.00538 | 3   | 0.00383  | 0.68151  | 6.82995  | 3       | 0.8602 |
| Spanish American | A:DRB1 | 0201:0901 | 0.00538 | 3   | 0.00114  | 0.07347  | 0.22111  | 3       | 2.3656 |
| Spanish American | A:DRB1 | 0204:0411 | 0.00538 | 3   | 0.0052   | 0.74357  | 86.55547 | 3       | 0.1004 |



|                  |        |           |         |     |          |          |          |         |        |
|------------------|--------|-----------|---------|-----|----------|----------|----------|---------|--------|
| Spanish American | A:DRB1 | 3002:0302 | 0.00538 | 3   | 0.00499  | 0.41062  | 38.03638 | 3       | 0.2133 |
| Spanish American | A:DRB1 | 7401:1602 | 0.00538 | 3   | 0.00518  | 0.59121  | 80.23655 | 3       | 0.1075 |
| Spanish American | A:DRB1 | 0301:1503 | 0.00538 | 3   | 0.00399  | 0.27059  | 7.11625  | 3       | 0.7742 |
| Spanish American | A:DRB1 | 2402:1101 | 0.00538 | 3   | 0.00124  | 0.03343  | 0.24035  | 3       | 2.3082 |
| Spanish American | A:DRB1 | 6801:0411 | 0.00527 | 2.9 | 0.00428  | 0.17777  | 11.05667 | 2.94263 | 0.552  |
| Spanish American | A:DRB1 | 0301:0404 | 0.00515 | 2.9 | 0.00099  | 0.02241  | 0.15146  | 2.87571 | 2.3226 |
| Spanish American | A:DRB1 | 0101:1001 | 0.00513 | 2.9 | 0.0031   | 0.12481  | 2.95003  | 2.86027 | 1.129  |
| Spanish American | A:DRB1 | 2902:0101 | 0.00507 | 2.8 | 0.00218  | 0.04448  | 1.02866  | 2.82925 | 1.6111 |
| Spanish American | A:DRB1 | 2402:1602 | 0.00494 | 2.8 | 0.00279  | 0.14403  | 2.28055  | 2.7592  | 1.2043 |
| Spanish American | A:DRB1 | 0201:0404 | 0.00488 | 2.7 | -0.00552 | -0.53069 | 2.18925  | 2.72501 | 5.8065 |
| Spanish American | A:DRB1 | 0301:1301 | 0.00463 | 2.6 | -0.00015 | -0.03215 | 0.00319  | 2.58093 | 2.6667 |
| Spanish American | A:DRB1 | 3201:0404 | 0.00442 | 2.5 | 0.00372  | 0.27283  | 11.88166 | 2.46413 | 0.3871 |
| Spanish American | A:DRB1 | 2402:1406 | 0.00441 | 2.5 | 0.00279  | 0.19207  | 3.02499  | 2.45835 | 0.9032 |
| Spanish American | A:DRB1 | 0201:1406 | 0.00439 | 2.4 | 0.00092  | 0.07245  | 0.17524  | 2.44729 | 1.9355 |
| Spanish American | A:DRB1 | 0301:1502 | 0.00417 | 2.3 | 0.00325  | 0.33069  | 7.04739  | 2.32961 | 0.5161 |
| Spanish American | A:DRB1 | 2902:1301 | 0.00394 | 2.2 | 0.00105  | 0.02136  | 0.23733  | 2.19622 | 1.6111 |
| Spanish American | A:DRB1 | 0301:1101 | 0.00391 | 2.2 | 0.00037  | 0.00977  | 0.02431  | 2.18378 | 1.9785 |
| Spanish American | A:DRB1 | 3301:1301 | 0.00358 | 2   | 0.00219  | 0.09244  | 2.08595  | 2       | 0.7778 |
| Spanish American | A:DRB1 | 3002:1104 | 0.00358 | 2   | 0.00271  | 0.0975   | 4.98372  | 2       | 0.4875 |
| Spanish American | A:DRB1 | 6801:1101 | 0.00358 | 2   | 0.00196  | 0.05183  | 1.43095  | 2       | 0.9068 |
| Spanish American | A:DRB1 | 0201:1001 | 0.00358 | 2   | -0.0022  | -0.38    | 0.60982  | 2       | 3.2258 |
| Spanish American | A:DRB1 | 2601:0101 | 0.00358 | 2   | 0.00209  | 0.08235  | 1.77719  | 2       | 0.8333 |
| Spanish American | A:DRB1 | 0205:1102 | 0.00358 | 2   | 0.00343  | 0.48901  | 43.83622 | 2       | 0.086  |
| Spanish American | A:DRB1 | 3201:1401 | 0.00358 | 2   | 0.00333  | 0.23631  | 24.83822 | 2       | 0.1434 |
| Spanish American | A:DRB1 | 2402:0402 | 0.00358 | 2   | 0.00251  | 0.25896  | 3.64621  | 2       | 0.6022 |
| Spanish American | A:DRB1 | 0101:1401 | 0.00358 | 2   | 0.00224  | 0.13488  | 2.276    | 2       | 0.7527 |
| Spanish American | A:DRB1 | 0206:1302 | 0.00358 | 2   | 0.00237  | 0.07635  | 2.7726   | 2       | 0.6774 |
| Spanish American | A:DRB1 | 0217:0411 | 0.00358 | 2   | 0.0034   | 0.48713  | 37.14918 | 2       | 0.1004 |
| Spanish American | A:DRB1 | 0201:0102 | 0.00358 | 2   | -0.00489 | -0.57727 | 2.09104  | 2       | 4.7312 |
| Spanish American | A:DRB1 | 2301:0302 | 0.00358 | 2   | 0.00302  | 0.25221  | 9.61383  | 2       | 0.3136 |
| Spanish American | A:DRB1 | 1101:1101 | 0.00358 | 2   | 0.00129  | 0.03325  | 0.45081  | 2       | 1.2778 |
| Spanish American | A:DRB1 | 3201:1101 | 0.00358 | 2   | 0.00299  | 0.21776  | 8.95224  | 2       | 0.3297 |

|                  |        |           |         |     |          |          |           |         |        |
|------------------|--------|-----------|---------|-----|----------|----------|-----------|---------|--------|
| Spanish American | A:DRB1 | 2601:1103 | 0.00358 | 2   | 0.00344  | 0.65746  | 47.19628  | 2       | 0.0806 |
| Spanish American | A:DRB1 | 6802:1302 | 0.00358 | 2   | 0.00318  | 0.2619   | 14.58776  | 2       | 0.2258 |
| Spanish American | A:DRB1 | 0301:0403 | 0.00358 | 2   | 0.00235  | 0.17941  | 2.77583   | 2       | 0.6882 |
| Spanish American | A:DRB1 | 2501:1001 | 0.00358 | 2   | 0.0032   | 0.22928  | 15.44575  | 2       | 0.2151 |
| Spanish American | A:DRB1 | 6801:1301 | 0.00358 | 2   | 0.00139  | 0.03743  | 0.54557   | 2       | 1.2222 |
| Spanish American | A:DRB1 | 6802:1001 | 0.00358 | 2   | 0.00325  | 0.26598  | 18.15498  | 2       | 0.1882 |
| Spanish American | A:DRB1 | 1101:1404 | 0.00358 | 2   | 0.00339  | 1        | 34.1223   | 2       | 0.1111 |
| Spanish American | A:DRB1 | 3101:0407 | 0.00358 | 2   | 0.00151  | 0.04721  | 0.67558   | 2       | 1.1577 |
| Spanish American | A:DRB1 | 2402:1601 | 0.00358 | 2   | 0.00286  | 0.44422  | 7.12693   | 2       | 0.4014 |
| Spanish American | A:DRB1 | 0201:1601 | 0.00358 | 2   | 0.00204  | 0.36301  | 1.93786   | 2       | 0.8602 |
| Spanish American | A:DRB1 | 8001:0102 | 0.00358 | 2   | 0.00337  | 0.65299  | 31.33366  | 2       | 0.1183 |
| Spanish American | A:DRB1 | 3002:1301 | 0.00358 | 2   | 0.00189  | 0.06574  | 1.28839   | 2       | 0.9444 |
| Spanish American | A:DRB1 | 3402:1503 | 0.00358 | 2   | 0.00353  | 1        | 122.43885 | 2       | 0.0323 |
| Spanish American | A:DRB1 | 6801:0901 | 0.00358 | 2   | 0.00281  | 0.14824  | 6.00744   | 2       | 0.4337 |
| Spanish American | A:DRB1 | 6801:1602 | 0.00349 | 1.9 | 0.00264  | 0.12766  | 4.86943   | 1.94465 | 0.4731 |
| Spanish American | A:DRB1 | 3101:0404 | 0.00337 | 1.9 | 0.00172  | 0.05316  | 1.09332   | 1.88058 | 0.9194 |
| Spanish American | A:DRB1 | 2301:0102 | 0.00315 | 1.8 | 0.00139  | 0.03681  | 0.66162   | 1.7592  | 0.9857 |
| Spanish American | A:DRB1 | 0201:0402 | 0.00283 | 1.6 | 0.00051  | 0.06095  | 0.08224   | 1.57738 | 1.2903 |
| Spanish American | A:DRB1 | 2402:0405 | 0.00262 | 1.5 | 0.00172  | 0.21394  | 2.06999   | 1.46413 | 0.5018 |
| Spanish American | A:DRB1 | 6801:0407 | 0.00256 | 1.4 | 0.00015  | 0.00415  | 0.00607   | 1.42619 | 1.3405 |
| Spanish American | A:DRB1 | 3004:0701 | 0.00245 | 1.4 | 0.00181  | 0.38211  | 3.22729   | 1.36889 | 0.3602 |
| Spanish American | A:DRB1 | 1101:0701 | 0.00243 | 1.4 | -0.00424 | -0.63595 | 1.81143   | 1.35508 | 3.7222 |
| Spanish American | A:DRB1 | 0301:0401 | 0.00233 | 1.3 | 0.00033  | 0.01551  | 0.03404   | 1.30262 | 1.1183 |
| Spanish American | A:DRB1 | 3101:0101 | 0.00228 | 1.3 | 0.00039  | 0.01212  | 0.04914   | 1.27309 | 1.0556 |
| Spanish American | A:DRB1 | 0206:0404 | 0.00227 | 1.3 | 0.00045  | 0.01262  | 0.06835   | 1.26832 | 1.0161 |
| Spanish American | A:DRB1 | 2402:0102 | 0.00222 | 1.2 | -0.00173 | -0.43801 | 0.49017   | 1.2408  | 2.2079 |
| Spanish American | A:DRB1 | 2301:1602 | 0.00222 | 1.2 | 0.00126  | 0.06135  | 0.98397   | 1.2408  | 0.5376 |
| Spanish American | A:DRB1 | 0201:1402 | 0.0022  | 1.2 | -0.00088 | -0.28498 | 0.18059   | 1.23014 | 1.7204 |
| Spanish American | A:DRB1 | 0205:0101 | 0.00214 | 1.2 | 0.00095  | 0.04673  | 0.45517   | 1.19622 | 0.6667 |
| Spanish American | A:DRB1 | 2501:0301 | 0.00208 | 1.2 | 0.00085  | 0.06461  | 0.35995   | 1.16057 | 0.6882 |
| Spanish American | A:DRB1 | 2902:1001 | 0.00204 | 1.1 | 0.00065  | 0.02533  | 0.18036   | 1.13973 | 0.7796 |
| Spanish American | A:DRB1 | 3101:1406 | 0.00196 | 1.1 | 0.00141  | 0.09063  | 2.13158   | 1.09436 | 0.3065 |

|                  |        |           |         |     |          |          |          |         |        |
|------------------|--------|-----------|---------|-----|----------|----------|----------|---------|--------|
| Spanish American | A:DRB1 | 2402:1402 | 0.00196 | 1.1 | 0.00052  | 0.0405   | 0.11935  | 1.09436 | 0.8029 |
| Spanish American | A:DRB1 | 2402:0411 | 0.00189 | 1.1 | -0.00062 | -0.24743 | 0.09808  | 1.05737 | 1.405  |
| Spanish American | A:DRB1 | 0201:1602 | 0.00189 | 1.1 | -0.00273 | -0.59105 | 1.17376  | 1.05535 | 2.5806 |
| Spanish American | A:DRB1 | 6801:0701 | 0.00189 | 1.1 | -0.00284 | -0.60048 | 1.1269   | 1.05535 | 2.6416 |
| Spanish American | A:DRB1 | 0301:1104 | 0.00179 | 1   | -0.00067 | -0.27344 | 0.11592  | 1       | 1.3763 |
| Spanish American | A:DRB1 | 2402:1301 | 0.00179 | 1   | -0.00378 | -0.67857 | 1.68601  | 1       | 3.1111 |
| Spanish American | A:DRB1 | 3101:1302 | 0.00179 | 1   | 0.00069  | 0.02226  | 0.26154  | 1       | 0.6129 |
| Spanish American | A:DRB1 | 2601:0901 | 0.00179 | 1   | 0.00126  | 0.0658   | 1.75852  | 1       | 0.2957 |
| Spanish American | A:DRB1 | 0301:1304 | 0.00179 | 1   | 0.00148  | 0.45294  | 4.37524  | 1       | 0.172  |
| Spanish American | A:DRB1 | 6805:0407 | 0.00179 | 1   | 0.00168  | 1        | 15.43943 | 1       | 0.0609 |
| Spanish American | A:DRB1 | 2501:1303 | 0.00179 | 1   | 0.00164  | 0.15455  | 9.95936  | 1       | 0.086  |
| Spanish American | A:DRB1 | 0205:1406 | 0.00179 | 1   | 0.00145  | 0.09158  | 3.49036  | 1       | 0.1935 |
| Spanish American | A:DRB1 | 0206:1501 | 0.00179 | 1   | -0.00064 | -0.2619  | 0.10323  | 1       | 1.3548 |
| Spanish American | A:DRB1 | 6802:1304 | 0.00179 | 1   | 0.00175  | 0.49365  | 38.50149 | 1       | 0.0251 |
| Spanish American | A:DRB1 | 2425:0404 | 0.00179 | 1   | 0.00171  | 1        | 19.70197 | 1       | 0.0484 |
| Spanish American | A:DRB1 | 0201:1306 | 0.00179 | 1   | 0.00141  | 1        | 3.65655  | 1       | 0.2151 |
| Spanish American | A:DRB1 | 2902:1303 | 0.00179 | 1   | 0.00123  | 0.12098  | 1.61939  | 1       | 0.3118 |
| Spanish American | A:DRB1 | 3601:0301 | 0.00179 | 1   | 0.00148  | 0.45294  | 4.37524  | 1       | 0.172  |
| Spanish American | A:DRB1 | 3001:1201 | 0.00179 | 1   | 0.00164  | 0.23352  | 9.99611  | 1       | 0.086  |
| Spanish American | A:DRB1 | 0202:0103 | 0.00179 | 1   | 0.00177  | 0.4973   | 91.83185 | 1       | 0.0108 |
| Spanish American | A:DRB1 | 1101:1401 | 0.00179 | 1   | 0.0008   | 0.04706  | 0.38334  | 1       | 0.5556 |
| Spanish American | A:DRB1 | 3102:0802 | 0.00179 | 1   | 0.0017   | 1        | 18.96255 | 1       | 0.0502 |
| Spanish American | A:DRB1 | 3001:1503 | 0.00179 | 1   | 0.00145  | 0.09158  | 3.49036  | 1       | 0.1935 |
| Spanish American | A:DRB1 | 3101:0901 | 0.00179 | 1   | 0.00112  | 0.05886  | 1.10297  | 1       | 0.3746 |
| Spanish American | A:DRB1 | 3002:1503 | 0.00179 | 1   | 0.0013   | 0.08318  | 2.01411  | 1       | 0.2742 |
| Spanish American | A:DRB1 | 0201:1401 | 0.00179 | 1   | -0.00206 | -0.535   | 0.79849  | 1       | 2.1505 |
| Spanish American | A:DRB1 | 2601:1406 | 0.00179 | 1   | 0.00136  | 0.08656  | 2.4809   | 1       | 0.2419 |
| Spanish American | A:DRB1 | 2402:0101 | 0.00179 | 1   | -0.00378 | -0.67857 | 1.68601  | 1       | 3.1111 |
| Spanish American | A:DRB1 | 0211:0407 | 0.00179 | 1   | 0.00136  | 0.20134  | 2.51698  | 1       | 0.2437 |
| Spanish American | A:DRB1 | 0222:0407 | 0.00179 | 1   | 0.00168  | 1        | 15.43943 | 1       | 0.0609 |
| Spanish American | A:DRB1 | 2301:0101 | 0.00179 | 1   | -0.0007  | -0.28    | 0.1207   | 1       | 1.3889 |
| Spanish American | A:DRB1 | 3101:0807 | 0.00179 | 1   | 0.00173  | 1        | 28.41935 | 1       | 0.0341 |

|                  |        |           |         |   |          |          |          |   |        |
|------------------|--------|-----------|---------|---|----------|----------|----------|---|--------|
| Spanish American | A:DRB1 | 3101:0411 | 0.00179 | 1 | 0.00094  | 0.0387   | 0.61     | 1 | 0.4767 |
| Spanish American | A:DRB1 | 6602:1503 | 0.00179 | 1 | 0.00176  | 1        | 61.10952 | 1 | 0.0161 |
| Spanish American | A:DRB1 | 2301:0802 | 0.00179 | 1 | -0.00046 | -0.20286 | 0.0569   | 1 | 1.2545 |
| Spanish American | A:DRB1 | 1105:1405 | 0.00179 | 1 | 0.00179  | 1        | 558      | 1 | 0.0018 |
| Spanish American | A:DRB1 | 2601:0301 | 0.00179 | 1 | -0.00052 | -0.225   | 0.07344  | 1 | 1.2903 |
| Spanish American | A:DRB1 | 3001:1302 | 0.00179 | 1 | 0.0011   | 0.05278  | 1.02482  | 1 | 0.3871 |
| Spanish American | A:DRB1 | 2601:1502 | 0.00179 | 1 | 0.0015   | 0.14365  | 4.53048  | 1 | 0.1613 |
| Spanish American | A:DRB1 | 3303:1101 | 0.00179 | 1 | 0.0015   | 0.21776  | 4.4438   | 1 | 0.1649 |
| Spanish American | A:DRB1 | 0101:0401 | 0.00179 | 1 | 0.00004  | 0.00179  | 0.00052  | 1 | 0.9785 |
| Spanish American | A:DRB1 | 6801:1102 | 0.00179 | 1 | 0.00151  | 0.21922  | 4.71707  | 1 | 0.1577 |
| Spanish American | A:DRB1 | 3301:1501 | 0.00179 | 1 | 0.00017  | 0.00739  | 0.01137  | 1 | 0.9032 |
| Spanish American | A:DRB1 | 0101:0408 | 0.00179 | 1 | 0.00166  | 1        | 12.30777 | 1 | 0.0753 |
| Spanish American | A:DRB1 | 6802:0901 | 0.00179 | 1 | 0.00154  | 0.12562  | 5.56282  | 1 | 0.138  |
| Spanish American | A:DRB1 | 2305:1503 | 0.00179 | 1 | 0.00176  | 1        | 61.10952 | 1 | 0.0161 |
| Spanish American | A:DRB1 | 0301:1407 | 0.00179 | 1 | 0.00164  | 1        | 10.64408 | 1 | 0.086  |
| Spanish American | A:DRB1 | 3301:1001 | 0.00179 | 1 | 0.00112  | 0.04578  | 1.08937  | 1 | 0.3763 |
| Spanish American | A:DRB1 | 2402:0301 | 0.00179 | 1 | -0.00684 | -0.79241 | 3.67867  | 1 | 4.8172 |
| Spanish American | A:DRB1 | 1101:0103 | 0.00179 | 1 | 0.00149  | 0.29412  | 4.43561  | 1 | 0.1667 |
| Spanish American | A:DRB1 | 3004:1501 | 0.00179 | 1 | 0.00145  | 0.28736  | 3.61137  | 1 | 0.1935 |
| Spanish American | A:DRB1 | 6801:1302 | 0.00179 | 1 | 0.00052  | 0.01679  | 0.12776  | 1 | 0.7097 |
| Spanish American | A:DRB1 | 0301:0402 | 0.00179 | 1 | 0.00087  | 0.08824  | 0.50172  | 1 | 0.5161 |
| Spanish American | A:DRB1 | 6801:0103 | 0.00179 | 1 | 0.00158  | 0.30597  | 6.87959  | 1 | 0.1183 |
| Spanish American | A:DRB1 | 2403:1302 | 0.00179 | 1 | 0.00168  | 0.48333  | 14.06709 | 1 | 0.0645 |
| Spanish American | A:DRB1 | 0101:0402 | 0.00179 | 1 | 0.00098  | 0.09884  | 0.72793  | 1 | 0.4516 |
| Spanish American | A:DRB1 | 0205:1101 | 0.00179 | 1 | 0.00091  | 0.04393  | 0.5504   | 1 | 0.4946 |
| Spanish American | A:DRB1 | 0205:0411 | 0.00179 | 1 | 0.00125  | 0.05974  | 1.70084  | 1 | 0.3011 |
| Spanish American | A:DRB1 | 2403:1301 | 0.00179 | 1 | 0.00159  | 0.47059  | 7.5565   | 1 | 0.1111 |
| Spanish American | A:DRB1 | 0101:1402 | 0.00179 | 1 | 0.00071  | 0.05378  | 0.2884   | 1 | 0.6022 |
| Spanish American | A:DRB1 | 0217:0802 | 0.00179 | 1 | 0.00143  | 0.21038  | 3.37521  | 1 | 0.2007 |
| Spanish American | A:DRB1 | 0301:0804 | 0.00179 | 1 | 0.00148  | 0.45294  | 4.37524  | 1 | 0.172  |
| Spanish American | A:DRB1 | 6802:0102 | 0.00179 | 1 | 0.0013   | 0.10768  | 2.00244  | 1 | 0.276  |
| Spanish American | A:DRB1 | 2601:0701 | 0.00179 | 1 | -0.00144 | -0.44478 | 0.4161   | 1 | 1.8011 |

|                  |        |           |         |   |          |          |          |   |        |
|------------------|--------|-----------|---------|---|----------|----------|----------|---|--------|
| Spanish American | A:DRB1 | 7401:0901 | 0.00179 | 1 | 0.00162  | 0.18391  | 8.48584  | 1 | 0.0986 |
| Spanish American | A:DRB1 | 0301:1401 | 0.00179 | 1 | 0.00025  | 0.01529  | 0.02531  | 1 | 0.8602 |
| Spanish American | A:DRB1 | 7401:1302 | 0.00179 | 1 | 0.0015   | 0.17333  | 4.54741  | 1 | 0.1613 |
| Spanish American | A:DRB1 | 0201:0803 | 0.00179 | 1 | 0.00141  | 1        | 3.65655  | 1 | 0.2151 |
| Spanish American | A:DRB1 | 3303:0403 | 0.00179 | 1 | 0.00169  | 0.23909  | 15.83373 | 1 | 0.0573 |
| Spanish American | A:DRB1 | 2601:1602 | 0.00179 | 1 | 0.00121  | 0.05801  | 1.49401  | 1 | 0.3226 |
| Spanish American | A:DRB1 | 8001:1501 | 0.00179 | 1 | 0.00145  | 0.28736  | 3.61137  | 1 | 0.1935 |
| Spanish American | A:DRB1 | 0217:0404 | 0.00179 | 1 | 0.00145  | 0.21186  | 3.55657  | 1 | 0.1935 |
| Spanish American | A:DRB1 | 0211:0901 | 0.00179 | 1 | 0.00165  | 0.23492  | 11.05632 | 1 | 0.0789 |
| Spanish American | A:DRB1 | 0101:1502 | 0.00179 | 1 | 0.00098  | 0.09884  | 0.72793  | 1 | 0.4516 |
| Spanish American | A:DRB1 | 6801:1303 | 0.00179 | 1 | 0.00137  | 0.13246  | 2.59284  | 1 | 0.2366 |
| Spanish American | A:DRB1 | 0102:0401 | 0.00179 | 1 | 0.00175  | 1        | 41.99834 | 1 | 0.0233 |
| Spanish American | A:DRB1 | 0101:0405 | 0.00179 | 1 | 0.00112  | 0.13488  | 1.12771  | 1 | 0.3763 |
| Spanish American | A:DRB1 | 0206:0411 | 0.00179 | 1 | 0.00085  | 0.03512  | 0.45282  | 1 | 0.5269 |
| Spanish American | A:DRB1 | 3001:0102 | 0.00179 | 1 | 0.00094  | 0.04571  | 0.62426  | 1 | 0.4731 |
| Spanish American | A:DRB1 | 3001:0301 | 0.00179 | 1 | -0.00006 | -0.03125 | 0.00113  | 1 | 1.0323 |
| Spanish American | A:DRB1 | 3303:1104 | 0.00179 | 1 | 0.00159  | 0.22786  | 7.08597  | 1 | 0.1147 |
| Spanish American | A:DRB1 | 0302:1501 | 0.00179 | 1 | 0.00168  | 1        | 14.52603 | 1 | 0.0645 |
| Spanish American | A:DRB1 | 0301:0901 | 0.00179 | 1 | 0.0001   | 0.00535  | 0.00341  | 1 | 0.9462 |
| Spanish American | A:DRB1 | 0205:0701 | 0.00179 | 1 | -0.00079 | -0.30597 | 0.15667  | 1 | 1.4409 |
| Spanish American | A:DRB1 | 0101:1303 | 0.00179 | 1 | 0.00098  | 0.09884  | 0.72793  | 1 | 0.4516 |
| Spanish American | A:DRB1 | 2402:1303 | 0.00179 | 1 | 0.00071  | 0.07371  | 0.29536  | 1 | 0.6022 |
| Spanish American | A:DRB1 | 3001:1102 | 0.00179 | 1 | 0.00164  | 0.23352  | 9.99611  | 1 | 0.086  |
| Spanish American | A:DRB1 | 3301:0701 | 0.00179 | 1 | -0.00122 | -0.40512 | 0.3216   | 1 | 1.681  |
| Spanish American | A:DRB1 | 0211:0102 | 0.00179 | 1 | 0.00151  | 0.21922  | 4.71707  | 1 | 0.1577 |
| Spanish American | A:DRB1 | 2601:0410 | 0.00179 | 1 | 0.0017   | 0.48619  | 17.17537 | 1 | 0.0538 |
| Spanish American | A:DRB1 | 0213:0404 | 0.00179 | 1 | 0.00171  | 1        | 19.70197 | 1 | 0.0484 |
| Spanish American | A:DRB1 | 2301:0804 | 0.00179 | 1 | 0.00163  | 0.47655  | 9.71828  | 1 | 0.0896 |
| Spanish American | A:DRB1 | 2301:0411 | 0.00179 | 1 | 0.00067  | 0.02787  | 0.23788  | 1 | 0.6272 |
| Spanish American | A:DRB1 | 2402:0406 | 0.00179 | 1 | 0.00161  | 1        | 8.98038  | 1 | 0.1004 |
| Spanish American | A:DRB1 | 3001:0302 | 0.00179 | 1 | 0.00152  | 0.12402  | 4.96098  | 1 | 0.1505 |
| Spanish American | A:DRB1 | 0205:1305 | 0.00179 | 1 | 0.00175  | 1        | 45.58169 | 1 | 0.0215 |

|                  |        |           |         |      |          |          |           |          |        |
|------------------|--------|-----------|---------|------|----------|----------|-----------|----------|--------|
| Spanish American | A:DRB1 | 2301:1401 | 0.00179 | 1    | 0.00099  | 0.05779  | 0.72492   | 1        | 0.448  |
| Spanish American | A:DRB1 | 2402:1401 | 0.00179 | 1    | -0.00001 | -0.00357 | 0.00001   | 1        | 1.0036 |
| Spanish American | A:DRB1 | 3101:0801 | 0.00179 | 1    | 0.00161  | 0.30983  | 8.21397   | 1        | 0.1022 |
| Spanish American | A:DRB1 | 0201:0410 | 0.00179 | 1    | 0.00102  | 0.36301  | 0.96545   | 1        | 0.4301 |
| Spanish American | A:DRB1 | 3002:1303 | 0.00179 | 1    | 0.00146  | 0.14048  | 3.80914   | 1        | 0.1828 |
| Spanish American | A:DRB1 | 2301:0405 | 0.00179 | 1    | 0.00139  | 0.16248  | 2.83954   | 1        | 0.224  |
| Spanish American | A:DRB1 | 3301:0405 | 0.00179 | 1    | 0.00157  | 0.17941  | 6.31033   | 1        | 0.1254 |
| Spanish American | A:DRB1 | 0211:0411 | 0.00179 | 1    | 0.00161  | 0.2307   | 8.33192   | 1        | 0.1004 |
| Spanish American | A:DRB1 | 0301:0801 | 0.00179 | 1    | 0.00133  | 0.27059  | 2.34644   | 1        | 0.2581 |
| Spanish American | A:DRB1 | 3001:0801 | 0.00179 | 1    | 0.00168  | 0.31868  | 13.93757  | 1        | 0.0645 |
| Spanish American | A:DRB1 | 3303:1401 | 0.00179 | 1    | 0.00166  | 0.23631  | 12.32944  | 1        | 0.0717 |
| Spanish American | A:DRB1 | 3601:1602 | 0.00179 | 1    | 0.00172  | 0.48901  | 21.83927  | 1        | 0.043  |
| Spanish American | A:DRB1 | 0202:1314 | 0.00179 | 1    | 0.00179  | 1        | 278.4991  | 1        | 0.0036 |
| Spanish American | A:DRB1 | 2402:0302 | 0.00179 | 1    | 0.00053  | 0.04724  | 0.14181   | 1        | 0.7025 |
| Spanish American | A:DRB1 | 2902:1103 | 0.00179 | 1    | 0.00151  | 0.29679  | 4.84628   | 1        | 0.1559 |
| Spanish American | A:DRB1 | 2301:1302 | 0.00179 | 1    | 0.00035  | 0.01126  | 0.05025   | 1        | 0.8065 |
| Spanish American | A:DRB1 | 6901:1406 | 0.00179 | 1    | 0.00176  | 1        | 61.10952  | 1        | 0.0161 |
| Spanish American | A:DRB1 | 2301:1502 | 0.00179 | 1    | 0.00131  | 0.12758  | 2.10473   | 1        | 0.2688 |
| Spanish American | A:DRB1 | 1101:0401 | 0.00179 | 1    | 0.0005   | 0.02262  | 0.11582   | 1        | 0.7222 |
| Spanish American | A:DRB1 | 3201:0301 | 0.00179 | 1    | 0.00056  | 0.04265  | 0.15684   | 1        | 0.6882 |
| Spanish American | A:DRB1 | 2902:1302 | 0.00179 | 1    | 0.00012  | 0.00378  | 0.00485   | 1        | 0.9355 |
| Spanish American | A:DRB1 | 0101:1104 | 0.00179 | 1    | -0.00037 | -0.16964 | 0.03859   | 1        | 1.2043 |
| Spanish American | A:DRB1 | 0204:1501 | 0.00179 | 1    | 0.00133  | 0.19828  | 2.29664   | 1        | 0.2581 |
| Spanish American | A:DRB1 | 1101:1502 | 0.0012  | 0.7  | 0.0006   | 0.05948  | 0.36478   | 0.67039  | 0.3333 |
| Spanish American | A:DRB1 | 3004:1301 | 0.00113 | 0.6  | 0.00083  | 0.16392  | 1.37776   | 0.63111  | 0.1667 |
| Spanish American | A:DRB1 | 3201:0405 | 0.00096 | 0.5  | 0.00083  | 0.09419  | 3.07712   | 0.53587  | 0.0717 |
| Spanish American | A:DRB1 | 3001:0402 | 0.00076 | 0.4  | 0.00053  | 0.05001  | 0.69008   | 0.42262  | 0.129  |
| Spanish American | B:DRB1 | 0801:0301 | 0.04445 | 24.8 | 0.03921  | 0.70408  | 190.70381 | 24.80432 | 2.9247 |
| Spanish American | B:DRB1 | 4403:0701 | 0.04283 | 23.9 | 0.03401  | 0.52599  | 89.72032  | 23.89915 | 4.9229 |
| Spanish American | B:DRB1 | 0702:1501 | 0.03047 | 17   | 0.027    | 0.53678  | 132.46001 | 17       | 1.9355 |
| Spanish American | B:DRB1 | 3501:0101 | 0.02151 | 12   | 0.01812  | 0.34733  | 61.02641  | 12       | 1.8889 |
| Spanish American | B:DRB1 | 1801:0301 | 0.01613 | 9    | 0.01182  | 0.25763  | 20.78857  | 9.00161  | 2.4086 |

|                  |        |           |         |     |         |         |           |         |        |
|------------------|--------|-----------|---------|-----|---------|---------|-----------|---------|--------|
| Spanish American | B:DRB1 | 5101:0701 | 0.01434 | 8   | 0.00767 | 0.15682 | 5.91576   | 8       | 3.7222 |
| Spanish American | B:DRB1 | 1402:0102 | 0.01426 | 8   | 0.0132  | 0.51129 | 98.17665  | 7.95842 | 0.5914 |
| Spanish American | B:DRB1 | 1302:0701 | 0.01254 | 7   | 0.01061 | 0.7474  | 37.44681  | 6.99955 | 1.0806 |
| Spanish American | B:DRB1 | 3905:0407 | 0.01164 | 6.5 | 0.01033 | 0.51134 | 49.41994  | 6.49343 | 0.7312 |
| Spanish American | B:DRB1 | 3701:1001 | 0.01075 | 6   | 0.01037 | 0.74309 | 162.23983 | 6       | 0.2151 |
| Spanish American | B:DRB1 | 5101:0404 | 0.00959 | 5.4 | 0.0069  | 0.15107 | 11.00826  | 5.35233 | 1.5    |
| Spanish American | B:DRB1 | 4403:1501 | 0.00907 | 5.1 | 0.00433 | 0.07238 | 2.54197   | 5.05927 | 2.6452 |
| Spanish American | B:DRB1 | 3502:1104 | 0.00896 | 5   | 0.00865 | 0.82841 | 141.00022 | 5       | 0.172  |
| Spanish American | B:DRB1 | 3503:0701 | 0.00896 | 5   | 0.00681 | 0.43177 | 13.91134  | 5       | 1.2007 |
| Spanish American | B:DRB1 | 4002:0407 | 0.00896 | 5   | 0.0071  | 0.24832 | 16.6628   | 5       | 1.0358 |
| Spanish American | B:DRB1 | 2705:0101 | 0.00896 | 5   | 0.00777 | 0.38235 | 30.47899  | 5       | 0.6667 |
| Spanish American | B:DRB1 | 1501:1301 | 0.00896 | 5   | 0.00717 | 0.23529 | 17.50588  | 5       | 1      |
| Spanish American | B:DRB1 | 4402:1101 | 0.00806 | 4.5 | 0.00644 | 0.17035 | 15.45944  | 4.5     | 0.9068 |
| Spanish American | B:DRB1 | 5101:1101 | 0.00806 | 4.5 | 0.00577 | 0.14834 | 8.97345   | 4.5     | 1.2778 |
| Spanish American | B:DRB1 | 3512:0407 | 0.00753 | 4.2 | 0.00655 | 0.43259 | 26.382    | 4.20446 | 0.5484 |
| Spanish American | B:DRB1 | 4403:0102 | 0.00724 | 4   | 0.00435 | 0.11897 | 4.08787   | 4.04158 | 1.6165 |
| Spanish American | B:DRB1 | 1801:1104 | 0.00717 | 4   | 0.00573 | 0.21038 | 13.79973  | 4       | 0.8029 |
| Spanish American | B:DRB1 | 3908:0407 | 0.00717 | 4   | 0.00673 | 1       | 62.09216  | 4       | 0.2437 |
| Spanish American | B:DRB1 | 4002:0411 | 0.00717 | 4   | 0.0064  | 0.26327 | 31.67462  | 4       | 0.4265 |
| Spanish American | B:DRB1 | 1501:0401 | 0.00717 | 4   | 0.00642 | 0.28462 | 32.34589  | 4       | 0.4194 |
| Spanish American | B:DRB1 | 2705:0404 | 0.00717 | 4   | 0.00613 | 0.29944 | 21.62513  | 4       | 0.5806 |
| Spanish American | B:DRB1 | 5701:0701 | 0.00717 | 4   | 0.00566 | 0.51295 | 13.66888  | 4       | 0.8405 |
| Spanish American | B:DRB1 | 5201:0407 | 0.00717 | 4   | 0.00586 | 0.29008 | 15.90376  | 4       | 0.7312 |
| Spanish American | B:DRB1 | 1515:0802 | 0.00717 | 4   | 0.00654 | 0.54879 | 40.41161  | 4       | 0.3513 |
| Spanish American | B:DRB1 | 3517:0802 | 0.00705 | 3.9 | 0.00642 | 0.53843 | 38.90125  | 3.93117 | 0.3513 |
| Spanish American | B:DRB1 | 3906:1406 | 0.00705 | 3.9 | 0.00681 | 0.48306 | 115.52867 | 3.93117 | 0.129  |
| Spanish American | B:DRB1 | 5001:0701 | 0.007   | 3.9 | 0.00421 | 0.2052  | 4.10717   | 3.90823 | 1.5609 |
| Spanish American | B:DRB1 | 1801:1501 | 0.00689 | 3.8 | 0.00366 | 0.0779  | 2.59386   | 3.8469  | 1.8065 |
| Spanish American | B:DRB1 | 3512:0802 | 0.0068  | 3.8 | 0.00599 | 0.39118 | 26.49518  | 3.79554 | 0.4516 |
| Spanish American | B:DRB1 | 4801:0404 | 0.00654 | 3.6 | 0.00593 | 0.49674 | 34.40156  | 3.64767 | 0.3387 |
| Spanish American | B:DRB1 | 5101:0802 | 0.00654 | 3.6 | 0.00375 | 0.07911 | 3.13666   | 3.64767 | 1.5556 |
| Spanish American | B:DRB1 | 5001:0301 | 0.00554 | 3.1 | 0.00354 | 0.16611 | 3.90192   | 3.0919  | 1.1183 |

|                  |        |           |         |     |          |         |          |         |        |
|------------------|--------|-----------|---------|-----|----------|---------|----------|---------|--------|
| Spanish American | B:DRB1 | 4402:0301 | 0.00552 | 3.1 | 0.00213  | 0.05913 | 0.85075  | 3.08138 | 1.8925 |
| Spanish American | B:DRB1 | 5201:0802 | 0.00538 | 3   | 0.0043   | 0.21038 | 10.27398 | 3       | 0.6022 |
| Spanish American | B:DRB1 | 1801:1101 | 0.00538 | 3   | 0.00331  | 0.0845  | 3.24185  | 3       | 1.1541 |
| Spanish American | B:DRB1 | 5801:0404 | 0.00538 | 3   | 0.00451  | 0.26441 | 14.00005 | 3       | 0.4839 |
| Spanish American | B:DRB1 | 4001:0404 | 0.00538 | 3   | 0.0046   | 0.29944 | 16.13022 | 3       | 0.4355 |
| Spanish American | B:DRB1 | 5301:1401 | 0.00538 | 3   | 0.00499  | 0.28462 | 37.53028 | 3       | 0.2151 |
| Spanish American | B:DRB1 | 3501:1101 | 0.00538 | 3   | 0.00286  | 0.07401 | 2.02522  | 3       | 1.4014 |
| Spanish American | B:DRB1 | 3501:0302 | 0.00538 | 3   | 0.00461  | 0.39149 | 16.74493 | 3       | 0.4265 |
| Spanish American | B:DRB1 | 1503:1301 | 0.00538 | 3   | 0.00438  | 0.25882 | 11.59605 | 3       | 0.5556 |
| Spanish American | B:DRB1 | 3501:1402 | 0.00538 | 3   | 0.0045   | 0.33445 | 13.9916  | 3       | 0.4875 |
| Spanish American | B:DRB1 | 4402:0401 | 0.00538 | 3   | 0.00446  | 0.1992  | 12.86725 | 3       | 0.5125 |
| Spanish American | B:DRB1 | 1401:0701 | 0.00538 | 3   | 0.00452  | 0.71589 | 15.13139 | 3       | 0.4803 |
| Spanish American | B:DRB1 | 4901:0102 | 0.00538 | 3   | 0.00453  | 0.21922 | 14.35857 | 3       | 0.4731 |
| Spanish American | B:DRB1 | 4001:1302 | 0.00538 | 3   | 0.00486  | 0.31111 | 26.56175 | 3       | 0.2903 |
| Spanish American | B:DRB1 | 5301:1301 | 0.00538 | 3   | 0.00418  | 0.20588 | 8.8371   | 3       | 0.6667 |
| Spanish American | B:DRB1 | 4403:0402 | 0.00538 | 3   | 0.00459  | 0.46035 | 16.20787 | 3       | 0.4409 |
| Spanish American | B:DRB1 | 4402:1301 | 0.00523 | 2.9 | 0.00304  | 0.08164 | 2.59536  | 2.91862 | 1.2222 |
| Spanish American | B:DRB1 | 0801:1301 | 0.00373 | 2.1 | 0.00034  | 0.00661 | 0.02212  | 2.08138 | 1.8889 |
| Spanish American | B:DRB1 | 1402:0701 | 0.00366 | 2   | 0.00043  | 0.01822 | 0.03751  | 2.04158 | 1.8011 |
| Spanish American | B:DRB1 | 1518:1301 | 0.00358 | 2   | 0.00329  | 0.64706 | 21.46836 | 2       | 0.1667 |
| Spanish American | B:DRB1 | 5101:1302 | 0.00358 | 2   | 0.00179  | 0.05882 | 1.09412  | 2       | 1      |
| Spanish American | B:DRB1 | 5101:1301 | 0.00358 | 2   | 0.0005   | 0.00949 | 0.05023  | 2       | 1.7222 |
| Spanish American | B:DRB1 | 3911:0407 | 0.00358 | 2   | 0.00337  | 1       | 30.93441 | 2       | 0.1219 |
| Spanish American | B:DRB1 | 4002:1301 | 0.00358 | 2   | 0.00189  | 0.06574 | 1.28839  | 2       | 0.9444 |
| Spanish American | B:DRB1 | 4002:1406 | 0.00358 | 2   | 0.00309  | 0.19778 | 11.38743 | 2       | 0.2742 |
| Spanish American | B:DRB1 | 4901:1102 | 0.00358 | 2   | 0.00343  | 0.48901 | 43.83622 | 2       | 0.086  |
| Spanish American | B:DRB1 | 3801:0701 | 0.00358 | 2   | 0.00165  | 0.11609 | 0.90344  | 2       | 1.0806 |
| Spanish American | B:DRB1 | 5301:0301 | 0.00358 | 2   | 0.00173  | 0.08824 | 1.01446  | 2       | 1.0323 |
| Spanish American | B:DRB1 | 0702:0103 | 0.00358 | 2   | 0.0033   | 0.64773 | 22.27201 | 2       | 0.1613 |
| Spanish American | B:DRB1 | 3501:0407 | 0.00358 | 2   | -0.00013 | -0.0346 | 0.00281  | 2       | 2.0717 |
| Spanish American | B:DRB1 | 4402:1104 | 0.00358 | 2   | 0.00245  | 0.08909 | 3.18503  | 2       | 0.6308 |
| Spanish American | B:DRB1 | 4403:1503 | 0.00358 | 2   | 0.0024   | 0.16054 | 2.97294  | 2       | 0.6613 |



|                  |        |           |         |     |         |          |           |         |        |
|------------------|--------|-----------|---------|-----|---------|----------|-----------|---------|--------|
| Spanish American | B:DRB1 | 5101:0411 | 0.00358 | 2   | 0.00219 | 0.09244  | 2.08595   | 2       | 0.7778 |
| Spanish American | B:DRB1 | 1501:0802 | 0.00358 | 2   | 0.00197 | 0.06415  | 1.44889   | 2       | 0.9032 |
| Spanish American | B:DRB1 | 3801:1501 | 0.00358 | 2   | 0.00254 | 0.16858  | 3.76961   | 2       | 0.5806 |
| Spanish American | B:DRB1 | 0702:1401 | 0.00358 | 2   | 0.00262 | 0.15455  | 4.28035   | 2       | 0.5376 |
| Spanish American | B:DRB1 | 5201:1502 | 0.00358 | 2   | 0.00335 | 0.31868  | 28.02664  | 2       | 0.129  |
| Spanish American | B:DRB1 | 0702:0101 | 0.00358 | 2   | 0.0006  | 0.01176  | 0.0746    | 2       | 1.6667 |
| Spanish American | B:DRB1 | 5801:1503 | 0.00358 | 2   | 0.0033  | 0.20803  | 21.69369  | 2       | 0.1613 |
| Spanish American | B:DRB1 | 3905:0411 | 0.00358 | 2   | 0.00304 | 0.14522  | 10.04963  | 2       | 0.3011 |
| Spanish American | B:DRB1 | 5701:0101 | 0.00358 | 2   | 0.00289 | 0.2437   | 7.15701   | 2       | 0.3889 |
| Spanish American | B:DRB1 | 8101:1302 | 0.00358 | 2   | 0.0033  | 0.38     | 21.85584  | 2       | 0.1613 |
| Spanish American | B:DRB1 | 1402:1501 | 0.00358 | 2   | 0.00185 | 0.07356  | 1.20953   | 2       | 0.9677 |
| Spanish American | B:DRB1 | 1503:1602 | 0.00358 | 2   | 0.0032  | 0.18242  | 15.41695  | 2       | 0.2151 |
| Spanish American | B:DRB1 | 0702:0401 | 0.00358 | 2   | 0.00233 | 0.10577  | 2.62067   | 2       | 0.6989 |
| Spanish American | B:DRB1 | 1302:1001 | 0.00358 | 2   | 0.00315 | 0.20074  | 13.34339  | 2       | 0.2419 |
| Spanish American | B:DRB1 | 3903:1402 | 0.00358 | 2   | 0.00353 | 1        | 137.9946  | 2       | 0.0287 |
| Spanish American | B:DRB1 | 4501:0901 | 0.00358 | 2   | 0.00334 | 0.27135  | 25.95587  | 2       | 0.138  |
| Spanish American | B:DRB1 | 1801:1302 | 0.00358 | 2   | 0.00197 | 0.06415  | 1.44889   | 2       | 0.9032 |
| Spanish American | B:DRB1 | 5102:0403 | 0.00358 | 2   | 0.00353 | 1        | 137.9946  | 2       | 0.0287 |
| Spanish American | B:DRB1 | 4901:1101 | 0.00358 | 2   | 0.0027  | 0.13084  | 4.88357   | 2       | 0.4946 |
| Spanish American | B:DRB1 | 4101:1302 | 0.00358 | 2   | 0.0033  | 0.38     | 21.85584  | 2       | 0.1613 |
| Spanish American | B:DRB1 | 3501:1602 | 0.00358 | 2   | 0.00227 | 0.1126   | 2.39616   | 2       | 0.7312 |
| Spanish American | B:DRB1 | 4201:0302 | 0.00358 | 2   | 0.00354 | 1        | 157.99486 | 2       | 0.0251 |
| Spanish American | B:DRB1 | 4501:0102 | 0.00358 | 2   | 0.00309 | 0.2564   | 11.35396  | 2       | 0.276  |
| Spanish American | B:DRB1 | 0801:1302 | 0.00358 | 2   | 0.00162 | 0.05344  | 0.8185    | 2       | 1.0968 |
| Spanish American | B:DRB1 | 5101:1503 | 0.00358 | 2   | 0.00269 | 0.17647  | 4.84282   | 2       | 0.5    |
| Spanish American | B:DRB1 | 5001:1501 | 0.00358 | 2   | 0.00208 | 0.09548  | 1.75944   | 1.99987 | 0.8387 |
| Spanish American | B:DRB1 | 1501:0101 | 0.00355 | 2   | 0.00175 | 0.0576   | 1.04911   | 1.97922 | 1      |
| Spanish American | B:DRB1 | 3905:0802 | 0.0027  | 1.5 | 0.00162 | 0.07935  | 1.46162   | 1.50657 | 0.6022 |
| Spanish American | B:DRB1 | 4402:0101 | 0.00269 | 1.5 | 0.0005  | 0.01337  | 0.06959   | 1.5     | 1.2222 |
| Spanish American | B:DRB1 | 5101:0101 | 0.00269 | 1.5 | -0.0004 | -0.12903 | 0.03215   | 1.5     | 1.7222 |
| Spanish American | B:DRB1 | 4801:0802 | 0.00242 | 1.4 | 0.00179 | 0.15057  | 3.04195   | 1.35233 | 0.3513 |
| Spanish American | B:DRB1 | 3543:0407 | 0.00233 | 1.3 | 0.00212 | 0.62841  | 12.21607  | 1.30211 | 0.1219 |

|                  |        |           |         |     |          |          |          |         |        |
|------------------|--------|-----------|---------|-----|----------|----------|----------|---------|--------|
| Spanish American | B:DRB1 | 1801:0701 | 0.00206 | 1.2 | -0.00396 | -0.6575  | 1.739    | 1.15149 | 3.362  |
| Spanish American | B:DRB1 | 0801:1501 | 0.00196 | 1.1 | -0.00197 | -0.50149 | 0.62796  | 1.09351 | 2.1935 |
| Spanish American | B:DRB1 | 3517:1406 | 0.00192 | 1.1 | 0.00171  | 0.1388   | 8.33089  | 1.06883 | 0.1129 |
| Spanish American | B:DRB1 | 3906:0802 | 0.00192 | 1.1 | 0.0012   | 0.08783  | 1.18519  | 1.06883 | 0.4014 |
| Spanish American | B:DRB1 | 0801:0101 | 0.00183 | 1   | -0.00156 | -0.45959 | 0.44985  | 1.02078 | 1.8889 |
| Spanish American | B:DRB1 | 1501:0301 | 0.00183 | 1   | -0.00095 | -0.34074 | 0.20325  | 1.02078 | 1.5484 |
| Spanish American | B:DRB1 | 7801:1301 | 0.00179 | 1   | 0.00149  | 0.29412  | 4.43561  | 1       | 0.1667 |
| Spanish American | B:DRB1 | 5802:1201 | 0.00179 | 1   | 0.00175  | 0.32852  | 45.08535 | 1       | 0.0215 |
| Spanish American | B:DRB1 | 1501:0411 | 0.00179 | 1   | 0.00098  | 0.04048  | 0.7058   | 1       | 0.4516 |
| Spanish American | B:DRB1 | 0702:0901 | 0.00179 | 1   | 0.00073  | 0.03926  | 0.30435  | 1       | 0.5914 |
| Spanish American | B:DRB1 | 0702:1104 | 0.00179 | 1   | 0.00025  | 0.00923  | 0.02471  | 1       | 0.8602 |
| Spanish American | B:DRB1 | 1503:1304 | 0.00179 | 1   | 0.00173  | 0.49088  | 26.50412 | 1       | 0.0358 |
| Spanish American | B:DRB1 | 5001:1001 | 0.00179 | 1   | 0.00117  | 0.05142  | 1.27414  | 1       | 0.3495 |
| Spanish American | B:DRB1 | 3924:1303 | 0.00179 | 1   | 0.00177  | 1        | 92.16517 | 1       | 0.0108 |
| Spanish American | B:DRB1 | 5201:0411 | 0.00179 | 1   | 0.00125  | 0.05974  | 1.70084  | 1       | 0.3011 |
| Spanish American | B:DRB1 | 3503:1501 | 0.00179 | 1   | 0.00064  | 0.03793  | 0.21243  | 1       | 0.6452 |
| Spanish American | B:DRB1 | 8101:1304 | 0.00179 | 1   | 0.00176  | 0.49548  | 54.49986 | 1       | 0.0179 |
| Spanish American | B:DRB1 | 1516:0701 | 0.00179 | 1   | 0.00072  | 0.09084  | 0.30507  | 1       | 0.6004 |
| Spanish American | B:DRB1 | 1516:1104 | 0.00179 | 1   | 0.00154  | 0.17638  | 5.31711  | 1       | 0.1434 |
| Spanish American | B:DRB1 | 4001:0901 | 0.00179 | 1   | 0.00147  | 0.09324  | 3.95426  | 1       | 0.1774 |
| Spanish American | B:DRB1 | 4402:1306 | 0.00179 | 1   | 0.00172  | 1        | 24.40738 | 1       | 0.0394 |
| Spanish American | B:DRB1 | 8101:1303 | 0.00179 | 1   | 0.0017   | 0.1913   | 16.987   | 1       | 0.0538 |
| Spanish American | B:DRB1 | 5301:1303 | 0.00179 | 1   | 0.00156  | 0.14835  | 6.07355  | 1       | 0.129  |
| Spanish American | B:DRB1 | 4901:0405 | 0.00179 | 1   | 0.0016   | 0.18242  | 7.63878  | 1       | 0.1075 |
| Spanish American | B:DRB1 | 8101:1201 | 0.00179 | 1   | 0.00173  | 0.24322  | 26.3593  | 1       | 0.0358 |
| Spanish American | B:DRB1 | 4430:0701 | 0.00179 | 1   | 0.00158  | 1        | 7.34152  | 1       | 0.1201 |
| Spanish American | B:DRB1 | 3501:1401 | 0.00179 | 1   | 0.0007   | 0.0416   | 0.27162  | 1       | 0.6093 |
| Spanish American | B:DRB1 | 4403:1401 | 0.00179 | 1   | 0.00048  | 0.02863  | 0.10522  | 1       | 0.7348 |
| Spanish American | B:DRB1 | 4001:1101 | 0.00179 | 1   | 0.00113  | 0.0729   | 1.13071  | 1       | 0.371  |
| Spanish American | B:DRB1 | 1518:1602 | 0.00179 | 1   | 0.00168  | 0.31868  | 13.93757 | 1       | 0.0645 |
| Spanish American | B:DRB1 | 5201:0402 | 0.00179 | 1   | 0.00156  | 0.14835  | 6.07355  | 1       | 0.129  |
| Spanish American | B:DRB1 | 1507:0901 | 0.00179 | 1   | 0.00176  | 1        | 49.81655 | 1       | 0.0197 |

|                  |        |           |         |   |          |          |          |   |        |
|------------------|--------|-----------|---------|---|----------|----------|----------|---|--------|
| Spanish American | B:DRB1 | 4402:1406 | 0.00179 | 1 | 0.00116  | 0.07463  | 1.24119  | 1 | 0.3548 |
| Spanish American | B:DRB1 | 0801:1401 | 0.00179 | 1 | 0.0007   | 0.0416   | 0.27162  | 1 | 0.6093 |
| Spanish American | B:DRB1 | 3501:1104 | 0.00179 | 1 | 0.00004  | 0.00167  | 0.00071  | 1 | 0.9749 |
| Spanish American | B:DRB1 | 1402:1503 | 0.00179 | 1 | 0.00136  | 0.08656  | 2.4809   | 1 | 0.2419 |
| Spanish American | B:DRB1 | 4901:1302 | 0.00179 | 1 | 0.0011   | 0.05278  | 1.02482  | 1 | 0.3871 |
| Spanish American | B:DRB1 | 3901:0802 | 0.00179 | 1 | 0.00152  | 0.29811  | 5.07391  | 1 | 0.1505 |
| Spanish American | B:DRB1 | 1516:1501 | 0.00179 | 1 | 0.00121  | 0.14483  | 1.53444  | 1 | 0.3226 |
| Spanish American | B:DRB1 | 4004:0407 | 0.00179 | 1 | 0.00136  | 0.20134  | 2.51698  | 1 | 0.2437 |
| Spanish American | B:DRB1 | 5501:1501 | 0.00179 | 1 | 0.0011   | 0.1092   | 1.04863  | 1 | 0.3871 |
| Spanish American | B:DRB1 | 3504:0807 | 0.00179 | 1 | 0.00179  | 1        | 558      | 1 | 0.0018 |
| Spanish American | B:DRB1 | 5701:0301 | 0.00179 | 1 | 0.00071  | 0.06218  | 0.29126  | 1 | 0.6022 |
| Spanish American | B:DRB1 | 1517:0701 | 0.00179 | 1 | 0.00136  | 0.43177  | 2.74224  | 1 | 0.2401 |
| Spanish American | B:DRB1 | 4501:1201 | 0.00179 | 1 | 0.0017   | 0.24047  | 18.33862 | 1 | 0.0502 |
| Spanish American | B:DRB1 | 5401:1405 | 0.00179 | 1 | 0.00179  | 1        | 558      | 1 | 0.0018 |
| Spanish American | B:DRB1 | 3906:0403 | 0.00179 | 1 | 0.00159  | 0.11227  | 7.03368  | 1 | 0.1147 |
| Spanish American | B:DRB1 | 1517:0101 | 0.00179 | 1 | 0.00159  | 0.47059  | 7.5565   | 1 | 0.1111 |
| Spanish American | B:DRB1 | 3801:1302 | 0.00179 | 1 | 0.00127  | 0.08148  | 1.82198  | 1 | 0.2903 |
| Spanish American | B:DRB1 | 5601:0101 | 0.00179 | 1 | 0.00149  | 0.29412  | 4.43561  | 1 | 0.1667 |
| Spanish American | B:DRB1 | 3801:1502 | 0.00179 | 1 | 0.00162  | 0.15301  | 8.66144  | 1 | 0.0968 |
| Spanish American | B:DRB1 | 3801:1103 | 0.00179 | 1 | 0.00171  | 0.3224   | 19.12468 | 1 | 0.0484 |
| Spanish American | B:DRB1 | 3906:0301 | 0.00179 | 1 | 0.00056  | 0.04265  | 0.15684  | 1 | 0.6882 |
| Spanish American | B:DRB1 | 1402:1101 | 0.00179 | 1 | 0.00068  | 0.02654  | 0.25259  | 1 | 0.6183 |
| Spanish American | B:DRB1 | 5802:1301 | 0.00179 | 1 | 0.00149  | 0.29412  | 4.43561  | 1 | 0.1667 |
| Spanish American | B:DRB1 | 5702:0701 | 0.00179 | 1 | 0.00158  | 1        | 7.34152  | 1 | 0.1201 |
| Spanish American | B:DRB1 | 3512:1001 | 0.00179 | 1 | 0.00136  | 0.08656  | 2.4809   | 1 | 0.2419 |
| Spanish American | B:DRB1 | 1801:0408 | 0.00179 | 1 | 0.0017   | 1        | 18.96255 | 1 | 0.0502 |
| Spanish American | B:DRB1 | 5801:0901 | 0.00179 | 1 | 0.00144  | 0.0819   | 3.39648  | 1 | 0.1971 |
| Spanish American | B:DRB1 | 5801:0701 | 0.00179 | 1 | -0.00036 | -0.16716 | 0.03883  | 1 | 1.2007 |
| Spanish American | B:DRB1 | 5001:0401 | 0.00179 | 1 | 0.00125  | 0.0549   | 1.68211  | 1 | 0.3029 |
| Spanish American | B:DRB1 | 0702:1503 | 0.00179 | 1 | 0.00092  | 0.06061  | 0.59136  | 1 | 0.4839 |
| Spanish American | B:DRB1 | 2705:0403 | 0.00179 | 1 | 0.00148  | 0.10577  | 4.13135  | 1 | 0.172  |
| Spanish American | B:DRB1 | 1501:1001 | 0.00179 | 1 | 0.00092  | 0.03556  | 0.5846   | 1 | 0.4839 |

|                  |        |           |         |   |          |          |          |   |        |
|------------------|--------|-----------|---------|---|----------|----------|----------|---|--------|
| Spanish American | B:DRB1 | 1801:1407 | 0.00179 | 1 | 0.0017   | 1        | 18.96255 | 1 | 0.0502 |
| Spanish American | B:DRB1 | 2705:0402 | 0.00179 | 1 | 0.00156  | 0.14835  | 6.07355  | 1 | 0.129  |
| Spanish American | B:DRB1 | 7801:1001 | 0.00179 | 1 | 0.00165  | 0.31492  | 10.82838 | 1 | 0.0806 |
| Spanish American | B:DRB1 | 1501:1602 | 0.00179 | 1 | 0.0011   | 0.05278  | 1.02482  | 1 | 0.3871 |
| Spanish American | B:DRB1 | 4701:1302 | 0.00179 | 1 | 0.00168  | 0.48333  | 14.06709 | 1 | 0.0645 |
| Spanish American | B:DRB1 | 3503:0103 | 0.00179 | 1 | 0.0017   | 0.32117  | 17.04933 | 1 | 0.0538 |
| Spanish American | B:DRB1 | 1503:0301 | 0.00179 | 1 | 0.00025  | 0.01529  | 0.02531  | 1 | 0.8602 |
| Spanish American | B:DRB1 | 4501:1302 | 0.00179 | 1 | 0.00139  | 0.11429  | 2.7777   | 1 | 0.2258 |
| Spanish American | B:DRB1 | 5501:1103 | 0.00179 | 1 | 0.00173  | 0.32609  | 29.50646 | 1 | 0.0323 |
| Spanish American | B:DRB1 | 1503:0701 | 0.00179 | 1 | -0.00036 | -0.16716 | 0.03883  | 1 | 1.2007 |
| Spanish American | B:DRB1 | 4002:1602 | 0.00179 | 1 | 0.00114  | 0.05453  | 1.16043  | 1 | 0.3656 |
| Spanish American | B:DRB1 | 3501:1404 | 0.00179 | 1 | 0.00157  | 0.46756  | 6.76256  | 1 | 0.1219 |
| Spanish American | B:DRB1 | 4402:0402 | 0.00179 | 1 | 0.00137  | 0.13246  | 2.59284  | 1 | 0.2366 |
| Spanish American | B:DRB1 | 4004:1101 | 0.00179 | 1 | 0.0015   | 0.21776  | 4.4438   | 1 | 0.1649 |
| Spanish American | B:DRB1 | 5501:0411 | 0.00179 | 1 | 0.00152  | 0.14522  | 4.9702   | 1 | 0.1505 |
| Spanish American | B:DRB1 | 4101:0101 | 0.00179 | 1 | 0.00129  | 0.15294  | 2.00621  | 1 | 0.2778 |
| Spanish American | B:DRB1 | 4901:0404 | 0.00179 | 1 | 0.00075  | 0.03672  | 0.32526  | 1 | 0.5806 |
| Spanish American | B:DRB1 | 5703:1301 | 0.00179 | 1 | 0.00119  | 0.11765  | 1.42711  | 1 | 0.3333 |
| Spanish American | B:DRB1 | 3501:0701 | 0.00179 | 1 | -0.00552 | -0.75505 | 2.8166   | 1 | 4.0824 |
| Spanish American | B:DRB1 | 3501:1301 | 0.00179 | 1 | -0.00159 | -0.47059 | 0.47164  | 1 | 1.8889 |
| Spanish American | B:DRB1 | 3508:1402 | 0.00179 | 1 | 0.00177  | 1        | 68.87343 | 1 | 0.0143 |
| Spanish American | B:DRB1 | 1540:0802 | 0.00179 | 1 | 0.0017   | 1        | 18.96255 | 1 | 0.0502 |
| Spanish American | B:DRB1 | 3920:0804 | 0.00179 | 1 | 0.00179  | 1        | 278.4991 | 1 | 0.0036 |
| Spanish American | B:DRB1 | 5301:0102 | 0.00179 | 1 | 0.00094  | 0.04571  | 0.62426  | 1 | 0.4731 |
| Spanish American | B:DRB1 | 2705:0901 | 0.00179 | 1 | 0.00137  | 0.07093  | 2.56862  | 1 | 0.2366 |
| Spanish American | B:DRB1 | 3501:0405 | 0.00179 | 1 | 0.00125  | 0.14809  | 1.70527  | 1 | 0.3047 |
| Spanish American | B:DRB1 | 3501:0404 | 0.00179 | 1 | -0.00116 | -0.39216 | 0.28312  | 1 | 1.6452 |
| Spanish American | B:DRB1 | 4701:1101 | 0.00179 | 1 | 0.00164  | 0.4785   | 10.69025 | 1 | 0.0824 |
| Spanish American | B:DRB1 | 3517:0404 | 0.00179 | 1 | 0.00119  | 0.09927  | 1.37398  | 1 | 0.3387 |
| Spanish American | B:DRB1 | 5001:1102 | 0.00179 | 1 | 0.00163  | 0.23211  | 9.09967  | 1 | 0.0932 |
| Spanish American | B:DRB1 | 3501:0803 | 0.00179 | 1 | 0.00168  | 1        | 15.43943 | 1 | 0.0609 |
| Spanish American | B:DRB1 | 3503:1502 | 0.00179 | 1 | 0.0016   | 0.15146  | 7.62469  | 1 | 0.1075 |

|                  |        |           |         |   |          |          |          |   |        |
|------------------|--------|-----------|---------|---|----------|----------|----------|---|--------|
| Spanish American | B:DRB1 | 5801:0403 | 0.00179 | 1 | 0.00154  | 0.10903  | 5.28758  | 1 | 0.1434 |
| Spanish American | B:DRB1 | 3501:1601 | 0.00179 | 1 | 0.00136  | 0.20134  | 2.51698  | 1 | 0.2437 |
| Spanish American | B:DRB1 | 3801:0403 | 0.00179 | 1 | 0.00156  | 0.11066  | 6.06232  | 1 | 0.129  |
| Spanish American | B:DRB1 | 3505:0404 | 0.00179 | 1 | 0.00162  | 0.47458  | 8.89062  | 1 | 0.0968 |
| Spanish American | B:DRB1 | 4501:1301 | 0.00179 | 1 | 0.0011   | 0.09244  | 1.02972  | 1 | 0.3889 |
| Spanish American | B:DRB1 | 4005:0411 | 0.00179 | 1 | 0.00175  | 1        | 38.9269  | 1 | 0.0251 |
| Spanish American | B:DRB1 | 1804:1104 | 0.00179 | 1 | 0.00174  | 1        | 33.93582 | 1 | 0.0287 |
| Spanish American | B:DRB1 | 3905:0901 | 0.00179 | 1 | 0.00137  | 0.07093  | 2.56862  | 1 | 0.2366 |
| Spanish American | B:DRB1 | 4402:0302 | 0.00179 | 1 | 0.0013   | 0.10768  | 2.00244  | 1 | 0.276  |
| Spanish American | B:DRB1 | 7801:1601 | 0.00179 | 1 | 0.00175  | 0.32852  | 45.08535 | 1 | 0.0215 |
| Spanish American | B:DRB1 | 2702:1104 | 0.00179 | 1 | 0.00169  | 0.48524  | 16.00964 | 1 | 0.0573 |
| Spanish American | B:DRB1 | 3901:0102 | 0.00179 | 1 | 0.00158  | 0.30597  | 6.87959  | 1 | 0.1183 |
| Spanish American | B:DRB1 | 1503:1404 | 0.00179 | 1 | 0.00173  | 0.49088  | 26.50412 | 1 | 0.0358 |
| Spanish American | B:DRB1 | 4002:1402 | 0.00179 | 1 | 0.00136  | 0.0975   | 2.45561  | 1 | 0.2437 |
| Spanish American | B:DRB1 | 4004:1303 | 0.00179 | 1 | 0.00172  | 0.24185  | 21.67987 | 1 | 0.043  |
| Spanish American | B:DRB1 | 5703:0401 | 0.00179 | 1 | 0.00154  | 0.14679  | 5.47881  | 1 | 0.1398 |
| Spanish American | B:DRB1 | 5703:0407 | 0.00179 | 1 | 0.00114  | 0.1126   | 1.18506  | 1 | 0.3656 |
| Spanish American | B:DRB1 | 5703:0405 | 0.00179 | 1 | 0.0017   | 0.1913   | 16.987   | 1 | 0.0538 |
| Spanish American | B:DRB1 | 3517:0411 | 0.00179 | 1 | 0.00148  | 0.1208   | 4.01951  | 1 | 0.1756 |
| Spanish American | B:DRB1 | 4002:0102 | 0.00179 | 1 | 0.00059  | 0.02019  | 0.1742   | 1 | 0.6703 |
| Spanish American | B:DRB1 | 3701:1201 | 0.00179 | 1 | 0.00169  | 0.23909  | 15.83373 | 1 | 0.0573 |
| Spanish American | B:DRB1 | 5601:1001 | 0.00179 | 1 | 0.00165  | 0.31492  | 10.82838 | 1 | 0.0806 |
| Spanish American | B:DRB1 | 4402:0404 | 0.00179 | 1 | -0.00012 | -0.06061 | 0.00428  | 1 | 1.0645 |
| Spanish American | B:DRB1 | 1515:0407 | 0.00179 | 1 | 0.00103  | 0.08724  | 0.83152  | 1 | 0.4265 |
| Spanish American | B:DRB1 | 3902:0404 | 0.00179 | 1 | 0.00162  | 0.47458  | 8.89062  | 1 | 0.0968 |
| Spanish American | B:DRB1 | 2702:0901 | 0.00179 | 1 | 0.00172  | 0.48995  | 23.95957 | 1 | 0.0394 |
| Spanish American | B:DRB1 | 0801:1303 | 0.00179 | 1 | 0.00114  | 0.1126   | 1.18506  | 1 | 0.3656 |
| Spanish American | B:DRB1 | 4002:0401 | 0.00179 | 1 | 0.00108  | 0.04792  | 0.97254  | 1 | 0.3961 |
| Spanish American | B:DRB1 | 5703:1303 | 0.00179 | 1 | 0.00168  | 0.15761  | 13.861   | 1 | 0.0645 |
| Spanish American | B:DRB1 | 1516:0102 | 0.00179 | 1 | 0.00144  | 0.16716  | 3.43485  | 1 | 0.1971 |
| Spanish American | B:DRB1 | 5802:1102 | 0.00179 | 1 | 0.00175  | 0.32852  | 45.08535 | 1 | 0.0215 |
| Spanish American | B:DRB1 | 1801:1502 | 0.00179 | 1 | 0.00125  | 0.12264  | 1.72679  | 1 | 0.3011 |

|                  |        |           |         |   |          |          |           |   |        |
|------------------|--------|-----------|---------|---|----------|----------|-----------|---|--------|
| Spanish American | B:DRB1 | 3906:0404 | 0.00179 | 1 | 0.0011   | 0.08051  | 1.03461   | 1 | 0.3871 |
| Spanish American | B:DRB1 | 5601:0401 | 0.00179 | 1 | 0.00167  | 0.31743  | 12.74133  | 1 | 0.0699 |
| Spanish American | B:DRB1 | 1801:0403 | 0.00179 | 1 | 0.00107  | 0.07877  | 0.95332   | 1 | 0.4014 |
| Spanish American | B:DRB1 | 4004:0410 | 0.00179 | 1 | 0.00177  | 0.49639  | 68.49913  | 1 | 0.0143 |
| Spanish American | B:DRB1 | 3502:0407 | 0.00179 | 1 | 0.00114  | 0.1126   | 1.18506   | 1 | 0.3656 |
| Spanish American | B:DRB1 | 3701:1301 | 0.00179 | 1 | 0.001    | 0.07353  | 0.74599   | 1 | 0.4444 |
| Spanish American | B:DRB1 | 0801:0804 | 0.00179 | 1 | 0.00157  | 0.46756  | 6.76256   | 1 | 0.1219 |
| Spanish American | B:DRB1 | 4101:1602 | 0.00179 | 1 | 0.0016   | 0.18242  | 7.63878   | 1 | 0.1075 |
| Spanish American | B:DRB1 | 3801:1401 | 0.00179 | 1 | 0.0015   | 0.09489  | 4.51368   | 1 | 0.1613 |
| Spanish American | B:DRB1 | 1401:0411 | 0.00179 | 1 | 0.00161  | 0.2307   | 8.33192   | 1 | 0.1004 |
| Spanish American | B:DRB1 | 1515:1503 | 0.00179 | 1 | 0.00159  | 0.12881  | 7.17431   | 1 | 0.1129 |
| Spanish American | B:DRB1 | 5002:0406 | 0.00179 | 1 | 0.00179  | 1        | 278.4991  | 1 | 0.0036 |
| Spanish American | B:DRB1 | 5201:0301 | 0.00179 | 1 | -0.00006 | -0.03125 | 0.00113   | 1 | 1.0323 |
| Spanish American | B:DRB1 | 1503:1101 | 0.00179 | 1 | 0.00105  | 0.06131  | 0.89027   | 1 | 0.4122 |
| Spanish American | B:DRB1 | 3901:1101 | 0.00179 | 1 | 0.00157  | 0.30467  | 6.51262   | 1 | 0.1237 |
| Spanish American | B:DRB1 | 3531:0407 | 0.00179 | 1 | 0.00168  | 1        | 15.43943  | 1 | 0.0609 |
| Spanish American | B:DRB1 | 4101:1305 | 0.00179 | 1 | 0.00178  | 1        | 110.79856 | 1 | 0.009  |
| Spanish American | B:DRB1 | 5501:1401 | 0.00179 | 1 | 0.0016   | 0.15146  | 7.62469   | 1 | 0.1075 |
| Spanish American | B:DRB1 | 5501:0801 | 0.00179 | 1 | 0.00173  | 0.32609  | 29.50646  | 1 | 0.0323 |
| Spanish American | B:DRB1 | 4901:1301 | 0.00179 | 1 | 0.0006   | 0.02941  | 0.18035   | 1 | 0.6667 |
| Spanish American | B:DRB1 | 1501:0410 | 0.00179 | 1 | 0.00168  | 0.48333  | 14.06709  | 1 | 0.0645 |
| Spanish American | B:DRB1 | 1801:1601 | 0.00179 | 1 | 0.00143  | 0.21038  | 3.37521   | 1 | 0.2007 |
| Spanish American | B:DRB1 | 5801:1601 | 0.00179 | 1 | 0.00166  | 0.23631  | 12.32944  | 1 | 0.0717 |
| Spanish American | B:DRB1 | 0705:1301 | 0.00179 | 1 | 0.00159  | 0.47059  | 7.5565    | 1 | 0.1111 |
| Spanish American | B:DRB1 | 1402:0405 | 0.00179 | 1 | 0.00155  | 0.1779   | 5.78019   | 1 | 0.1344 |
| Spanish American | B:DRB1 | 4403:0405 | 0.00179 | 1 | 0.00113  | 0.13656  | 1.18635   | 1 | 0.3674 |
| Spanish American | B:DRB1 | 3503:0801 | 0.00179 | 1 | 0.0017   | 0.32117  | 17.04933  | 1 | 0.0538 |
| Spanish American | B:DRB1 | 5301:0901 | 0.00179 | 1 | 0.00137  | 0.07093  | 2.56862   | 1 | 0.2366 |
| Spanish American | B:DRB1 | 4001:0801 | 0.00179 | 1 | 0.00171  | 0.3224   | 19.12468  | 1 | 0.0484 |
| Spanish American | B:DRB1 | 5801:1001 | 0.00179 | 1 | 0.00131  | 0.07514  | 2.08105   | 1 | 0.2688 |
| Spanish American | B:DRB1 | 4801:0901 | 0.00179 | 1 | 0.00154  | 0.12562  | 5.56282   | 1 | 0.138  |
| Spanish American | B:DRB1 | 1515:1406 | 0.00179 | 1 | 0.00159  | 0.12881  | 7.17431   | 1 | 0.1129 |

|                  |        |           |         |     |         |         |           |          |        |
|------------------|--------|-----------|---------|-----|---------|---------|-----------|----------|--------|
| Spanish American | B:DRB1 | 5703:1602 | 0.00179 | 1   | 0.00156 | 0.14835 | 6.07355   | 1        | 0.129  |
| Spanish American | B:DRB1 | 3902:1602 | 0.00179 | 1   | 0.00172 | 0.48901 | 21.83927  | 1        | 0.043  |
| Spanish American | B:DRB1 | 1516:1314 | 0.00179 | 1   | 0.00178 | 1       | 110.79856 | 1        | 0.009  |
| Spanish American | B:DRB1 | 4403:1103 | 0.00179 | 1   | 0.0014  | 0.28046 | 2.99174   | 1        | 0.2204 |
| Spanish American | B:DRB1 | 0702:0302 | 0.00179 | 1   | 0.00112 | 0.09416 | 1.10608   | 1        | 0.3763 |
| Spanish American | B:DRB1 | 2703:1302 | 0.00179 | 1   | 0.00173 | 1       | 30.05386  | 1        | 0.0323 |
| Spanish American | B:DRB1 | 5501:1301 | 0.00179 | 1   | 0.00119 | 0.11765 | 1.42711   | 1        | 0.3333 |
| Spanish American | B:DRB1 | 5001:1602 | 0.00179 | 1   | 0.00129 | 0.06147 | 1.94255   | 1        | 0.2796 |
| Spanish American | B:DRB1 | 5301:0404 | 0.00179 | 1   | 0.00075 | 0.03672 | 0.32526   | 1        | 0.5806 |
| Spanish American | B:DRB1 | 3505:1502 | 0.00179 | 1   | 0.00175 | 0.49457 | 45.16732  | 1        | 0.0215 |
| Spanish American | B:DRB1 | 4901:0802 | 0.00179 | 1   | 0.00071 | 0.03491 | 0.28283   | 1        | 0.6022 |
| Spanish American | B:DRB1 | 5108:0301 | 0.00179 | 1   | 0.00164 | 1       | 10.64408  | 1        | 0.086  |
| Spanish American | B:DRB1 | 0705:1001 | 0.00179 | 1   | 0.0017  | 0.48619 | 17.17537  | 1        | 0.0538 |
| Spanish American | B:DRB1 | 4801:1402 | 0.00179 | 1   | 0.00161 | 0.13039 | 8.28589   | 1        | 0.1004 |
| Spanish American | B:DRB1 | 0702:1602 | 0.00179 | 1   | 0.00064 | 0.03125 | 0.21078   | 1        | 0.6452 |
| Spanish American | B:DRB1 | 5002:0101 | 0.00179 | 1   | 0.00159 | 0.47059 | 7.5565    | 1        | 0.1111 |
| Spanish American | B:DRB1 | 3503:0403 | 0.00179 | 1   | 0.00154 | 0.10903 | 5.28758   | 1        | 0.1434 |
| Spanish American | B:DRB1 | 3905:0102 | 0.00179 | 1   | 0.00094 | 0.04571 | 0.62426   | 1        | 0.4731 |
| Spanish American | B:DRB1 | 3543:0802 | 0.00125 | 0.7 | 0.00107 | 0.31455 | 3.75914   | 0.69789  | 0.1004 |
| Spanish American | C:B    | 3501:0401 | 0.05734 | 32  | 0.04795 | 0.93024 | 171.95499 | 31.99369 | 5.2401 |
| Spanish American | C:B    | 0801:0701 | 0.05727 | 32  | 0.04995 | 0.93169 | 230.32193 | 31.95646 | 4.0824 |
| Spanish American | C:B    | 0702:0702 | 0.05017 | 28  | 0.04439 | 0.92518 | 225.2411  | 27.99663 | 3.2258 |
| Spanish American | C:B    | 4403:1601 | 0.04122 | 23  | 0.03687 | 0.67294 | 200.28388 | 23       | 2.4247 |
| Spanish American | C:B    | 4402:0501 | 0.03226 | 18  | 0.03021 | 0.80821 | 272.89967 | 18       | 1.1434 |
| Spanish American | C:B    | 1402:0802 | 0.02688 | 15  | 0.02601 | 1       | 462.43094 | 15       | 0.4839 |
| Spanish American | C:B    | 5101:1502 | 0.02504 | 14  | 0.02335 | 0.8114  | 196.24966 | 13.97198 | 0.9444 |
| Spanish American | C:B    | 5001:0602 | 0.02151 | 12  | 0.01958 | 0.91617 | 124.34874 | 12       | 1.0717 |
| Spanish American | C:B    | 5301:0401 | 0.02151 | 12  | 0.01819 | 1       | 67.30795  | 12       | 1.8495 |
| Spanish American | C:B    | 3905:0702 | 0.01971 | 11  | 0.0174  | 0.90663 | 83.66768  | 11       | 1.2903 |
| Spanish American | C:B    | 4901:0701 | 0.01971 | 11  | 0.01713 | 0.9053  | 73.65632  | 11       | 1.4409 |
| Spanish American | C:B    | 1801:1203 | 0.01792 | 10  | 0.01549 | 0.33711 | 61.03186  | 10       | 1.3548 |
| Spanish American | C:B    | 3512:0401 | 0.01613 | 9   | 0.01364 | 1       | 50.20511  | 9        | 1.3871 |

|                  |     |           |         |     |         |         |           |         |        |
|------------------|-----|-----------|---------|-----|---------|---------|-----------|---------|--------|
| Spanish American | C:B | 1801:0501 | 0.01613 | 9   | 0.01352 | 0.28423 | 43.4421   | 9       | 1.4552 |
| Spanish American | C:B | 1503:0210 | 0.01613 | 9   | 0.01581 | 0.89818 | 450.14901 | 9       | 0.1792 |
| Spanish American | C:B | 1302:0602 | 0.01613 | 9   | 0.0148  | 1       | 101.81611 | 9       | 0.7419 |
| Spanish American | C:B | 3801:1203 | 0.01613 | 9   | 0.01535 | 1       | 179.90164 | 9       | 0.4355 |
| Spanish American | C:B | 3701:0602 | 0.01434 | 8   | 0.01316 | 1       | 90.33866  | 8       | 0.6595 |
| Spanish American | C:B | 4001:0304 | 0.01434 | 8   | 0.01338 | 0.8819  | 113.1861  | 8       | 0.5323 |
| Spanish American | C:B | 3906:0702 | 0.01434 | 8   | 0.0128  | 1       | 67.36582  | 8       | 0.8602 |
| Spanish American | C:B | 4403:0401 | 0.01434 | 8   | 0.00301 | 0.04847 | 0.57059   | 8       | 6.319  |
| Spanish American | C:B | 4801:0801 | 0.01254 | 7   | 0.01234 | 1       | 432.42468 | 7       | 0.1129 |
| Spanish American | C:B | 2705:0202 | 0.01254 | 7   | 0.01162 | 0.56461 | 86.98511  | 7       | 0.5161 |
| Spanish American | C:B | 1515:0102 | 0.01254 | 7   | 0.01196 | 1       | 145.0504  | 7       | 0.3262 |
| Spanish American | C:B | 4002:0304 | 0.01194 | 6.7 | 0.01014 | 0.35359 | 34.87548  | 6.66084 | 1.0054 |
| Spanish American | C:B | 3502:0401 | 0.01075 | 6   | 0.0091  | 1       | 33.28817  | 6       | 0.9247 |
| Spanish American | C:B | 1801:0701 | 0.01075 | 6   | 0.00473 | 0.10707 | 2.47662   | 6       | 3.362  |
| Spanish American | C:B | 5701:0602 | 0.01075 | 6   | 0.00972 | 0.84431 | 56.24638  | 6       | 0.5771 |
| Spanish American | C:B | 5101:1402 | 0.00896 | 5   | 0.00796 | 0.47059 | 38.33405  | 5       | 0.5556 |
| Spanish American | C:B | 5801:0701 | 0.00896 | 5   | 0.00681 | 0.43177 | 13.91134  | 5       | 1.2007 |
| Spanish American | C:B | 3503:0401 | 0.00896 | 5   | 0.0062  | 0.4089  | 9.34389   | 5       | 1.5412 |
| Spanish American | C:B | 3517:0401 | 0.00896 | 5   | 0.00703 | 0.66223 | 17.06235  | 5       | 1.0789 |
| Spanish American | C:B | 8101:1801 | 0.00896 | 5   | 0.00882 | 1       | 307.75769 | 5       | 0.0806 |
| Spanish American | C:B | 1501:0303 | 0.00896 | 5   | 0.00827 | 0.39722 | 58.05119  | 5       | 0.3871 |
| Spanish American | C:B | 1501:0102 | 0.00896 | 5   | 0.00746 | 0.24248 | 22.37728  | 5       | 0.8387 |
| Spanish American | C:B | 5801:0302 | 0.00896 | 5   | 0.0088  | 1       | 276.4774  | 5       | 0.0896 |
| Spanish American | C:B | 4403:0202 | 0.00896 | 5   | 0.0058  | 0.14555 | 6.69951   | 5       | 1.7634 |
| Spanish American | C:B | 2705:0102 | 0.00896 | 5   | 0.00796 | 0.38816 | 37.8075   | 5       | 0.5591 |
| Spanish American | C:B | 1516:1402 | 0.00896 | 5   | 0.0088  | 1       | 276.4774  | 5       | 0.0896 |
| Spanish American | C:B | 1501:0304 | 0.00894 | 5   | 0.00703 | 0.23162 | 15.87532  | 4.98717 | 1.0645 |
| Spanish American | C:B | 4002:0202 | 0.00773 | 4.3 | 0.00642 | 0.22005 | 18.8912   | 4.31114 | 0.7312 |
| Spanish American | C:B | 3908:0702 | 0.00717 | 4   | 0.0064  | 1       | 33.43971  | 4       | 0.4301 |
| Spanish American | C:B | 4002:0305 | 0.00717 | 4   | 0.00684 | 0.65619 | 83.11069  | 4       | 0.1828 |
| Spanish American | C:B | 5201:1202 | 0.00717 | 4   | 0.00701 | 1       | 183.31408 | 4       | 0.086  |
| Spanish American | C:B | 4004:0304 | 0.00717 | 4   | 0.00674 | 1       | 64.09583  | 4       | 0.2366 |



|                  |     |           |         |   |          |          |           |   |        |
|------------------|-----|-----------|---------|---|----------|----------|-----------|---|--------|
| Spanish American | C:B | 4501:1601 | 0.00717 | 4 | 0.00643  | 0.54449  | 33.43532  | 4 | 0.414  |
| Spanish American | C:B | 5703:1801 | 0.00717 | 4 | 0.007    | 0.6612   | 161.75018 | 4 | 0.0968 |
| Spanish American | C:B | 5802:0602 | 0.00538 | 3 | 0.00493  | 1        | 33.5718   | 3 | 0.2473 |
| Spanish American | C:B | 1518:0704 | 0.00538 | 3 | 0.00531  | 1        | 237.41931 | 3 | 0.0376 |
| Spanish American | C:B | 5201:0303 | 0.00538 | 3 | 0.00491  | 0.23352  | 30.42771  | 3 | 0.2581 |
| Spanish American | C:B | 4402:0704 | 0.00538 | 3 | 0.00488  | 0.40512  | 28.34551  | 3 | 0.276  |
| Spanish American | C:B | 4403:0701 | 0.00538 | 3 | -0.00345 | -0.39061 | 0.9213    | 3 | 4.9229 |
| Spanish American | C:B | 3503:1203 | 0.00538 | 3 | 0.00451  | 0.26441  | 14.00005  | 3 | 0.4839 |
| Spanish American | C:B | 5101:1602 | 0.00538 | 3 | 0.00488  | 0.57647  | 28.50246  | 3 | 0.2778 |
| Spanish American | C:B | 1401:0802 | 0.00538 | 3 | 0.00515  | 0.74167  | 66.48493  | 3 | 0.129  |
| Spanish American | C:B | 5501:0303 | 0.00538 | 3 | 0.00515  | 0.48901  | 65.99256  | 3 | 0.129  |
| Spanish American | C:B | 4501:0602 | 0.00538 | 3 | 0.00434  | 0.37723  | 11.2282   | 3 | 0.5771 |
| Spanish American | C:B | 4101:1701 | 0.00538 | 3 | 0.0053   | 0.59638  | 198.4656  | 3 | 0.0448 |
| Spanish American | C:B | 7801:1601 | 0.00358 | 2 | 0.00327  | 0.64571  | 20.00731  | 2 | 0.1774 |
| Spanish American | C:B | 3911:0702 | 0.00358 | 2 | 0.0032   | 1        | 16.65971  | 2 | 0.2151 |
| Spanish American | C:B | 5101:1509 | 0.00358 | 2 | 0.00329  | 0.64706  | 21.46836  | 2 | 0.1667 |
| Spanish American | C:B | 5201:1502 | 0.00358 | 2 | 0.00293  | 0.14048  | 7.70201   | 2 | 0.3656 |
| Spanish American | C:B | 3901:1203 | 0.00358 | 2 | 0.00332  | 0.64972  | 25.04046  | 2 | 0.1452 |
| Spanish American | C:B | 1517:0701 | 0.00358 | 2 | 0.00315  | 1        | 14.70944  | 2 | 0.2401 |
| Spanish American | C:B | 5601:0102 | 0.00358 | 2 | 0.00333  | 0.65038  | 26.10536  | 2 | 0.1398 |
| Spanish American | C:B | 3543:0102 | 0.00358 | 2 | 0.00342  | 1        | 41.07028  | 2 | 0.0932 |
| Spanish American | C:B | 3903:0702 | 0.00358 | 2 | 0.0032   | 1        | 16.65971  | 2 | 0.2151 |
| Spanish American | C:B | 4701:0602 | 0.00358 | 2 | 0.00329  | 1        | 22.34094  | 2 | 0.1649 |
| Spanish American | C:B | 5501:0102 | 0.00358 | 2 | 0.00308  | 0.30075  | 11.22539  | 2 | 0.2796 |
| Spanish American | C:B | 5703:0701 | 0.00358 | 2 | 0.00229  | 0.24236  | 2.61086   | 2 | 0.7204 |
| Spanish American | C:B | 5102:0801 | 0.00358 | 2 | 0.00353  | 1        | 122.43885 | 2 | 0.0323 |
| Spanish American | C:B | 3505:0401 | 0.00358 | 2 | 0.00303  | 1        | 11.01623  | 2 | 0.3082 |
| Spanish American | C:B | 4201:1701 | 0.00358 | 2 | 0.00355  | 1        | 221.99568 | 2 | 0.0179 |
| Spanish American | C:B | 2702:0202 | 0.00358 | 2 | 0.00343  | 1        | 44.66007  | 2 | 0.086  |
| Spanish American | C:B | 3902:0702 | 0.00358 | 2 | 0.0032   | 1        | 16.65971  | 2 | 0.2151 |
| Spanish American | C:B | 0705:1505 | 0.00358 | 2 | 0.00357  | 1        | 558       | 2 | 0.0072 |
| Spanish American | C:B | 5101:1601 | 0.00358 | 2 | 0.0003   | 0.00571  | 0.01705   | 2 | 1.8333 |

|                  |     |           |         |     |          |          |          |         |        |
|------------------|-----|-----------|---------|-----|----------|----------|----------|---------|--------|
| Spanish American | C:B | 5101:0202 | 0.00303 | 1.7 | 0.00064  | 0.01568  | 0.10489  | 1.68886 | 1.3333 |
| Spanish American | C:B | 5101:0304 | 0.0024  | 1.3 | -0.00089 | -0.26955 | 0.14991  | 1.33916 | 1.8333 |
| Spanish American | C:B | 0801:0304 | 0.00186 | 1   | -0.00174 | -0.4827  | 0.53025  | 1.04017 | 2.0108 |
| Spanish American | C:B | 4101:0701 | 0.00185 | 1   | 0.00078  | 0.09848  | 0.35859  | 1.03364 | 0.6004 |
| Spanish American | C:B | 4002:1502 | 0.00184 | 1   | 0.00091  | 0.03095  | 0.53446  | 1.02802 | 0.5179 |
| Spanish American | C:B | 1501:0701 | 0.0018  | 1   | -0.00207 | -0.53429 | 0.72455  | 1.00653 | 2.1613 |
| Spanish American | C:B | 1501:0401 | 0.0018  | 1   | -0.00317 | -0.63726 | 1.37627  | 1.00631 | 2.7742 |
| Spanish American | C:B | 3501:0304 | 0.0018  | 1   | -0.0018  | -0.49954 | 0.5679   | 1.00631 | 2.0108 |
| Spanish American | C:B | 0702:0701 | 0.0018  | 1   | -0.00466 | -0.72145 | 2.2518   | 1.00337 | 3.6022 |
| Spanish American | C:B | 0801:0702 | 0.0018  | 1   | -0.00475 | -0.72555 | 2.29634  | 1.00337 | 3.6559 |
| Spanish American | C:B | 7801:0401 | 0.00179 | 1   | 0.00096  | 0.21186  | 0.74306  | 1       | 0.4624 |
| Spanish American | C:B | 5201:0306 | 0.00179 | 1   | 0.00172  | 0.48901  | 21.83927 | 1       | 0.043  |
| Spanish American | C:B | 5101:0501 | 0.00179 | 1   | -0.0011  | -0.37931 | 0.25889  | 1       | 1.6111 |
| Spanish American | C:B | 1801:1205 | 0.00179 | 1   | 0.0017   | 1        | 18.96255 | 1       | 0.0502 |
| Spanish American | C:B | 1801:0210 | 0.00179 | 1   | 0.00089  | 0.05245  | 0.53028  | 1       | 0.5018 |
| Spanish American | C:B | 0702:0304 | 0.00179 | 1   | -0.00139 | -0.43636 | 0.37947  | 1       | 1.7742 |
| Spanish American | C:B | 3924:0701 | 0.00179 | 1   | 0.00158  | 1        | 7.34152  | 1       | 0.1201 |
| Spanish American | C:B | 5201:0202 | 0.00179 | 1   | 0.00087  | 0.04213  | 0.48443  | 1       | 0.5161 |
| Spanish American | C:B | 5201:0304 | 0.00179 | 1   | 0.00052  | 0.02571  | 0.12901  | 1       | 0.7097 |
| Spanish American | C:B | 4430:1601 | 0.00179 | 1   | 0.00169  | 1        | 15.93765 | 1       | 0.0591 |
| Spanish American | C:B | 3501:0305 | 0.00179 | 1   | 0.00114  | 0.1126   | 1.18506  | 1       | 0.3656 |
| Spanish American | C:B | 4002:0306 | 0.00179 | 1   | 0.00168  | 0.48429  | 14.98117 | 1       | 0.0609 |
| Spanish American | C:B | 4001:0202 | 0.00179 | 1   | 0.0011   | 0.07116  | 1.03067  | 1       | 0.3871 |
| Spanish American | C:B | 1507:0102 | 0.00179 | 1   | 0.00171  | 1        | 20.49827 | 1       | 0.0466 |
| Spanish American | C:B | 5101:0102 | 0.00179 | 1   | -0.0008  | -0.30769 | 0.15187  | 1       | 1.4444 |
| Spanish American | C:B | 1501:0704 | 0.00179 | 1   | 0.00139  | 0.11429  | 2.7777   | 1       | 0.2258 |
| Spanish American | C:B | 3905:0401 | 0.00179 | 1   | -0.00152 | -0.4593  | 0.47139  | 1       | 1.8495 |
| Spanish American | C:B | 5701:0701 | 0.00179 | 1   | 0.00029  | 0.02589  | 0.03483  | 1       | 0.8405 |
| Spanish American | C:B | 5501:0401 | 0.00179 | 1   | 0.00013  | 0.01483  | 0.00732  | 1       | 0.9247 |
| Spanish American | C:B | 3504:0401 | 0.00179 | 1   | 0.00152  | 1        | 5.49823  | 1       | 0.1541 |
| Spanish American | C:B | 5401:0102 | 0.00179 | 1   | 0.00171  | 1        | 20.49827 | 1       | 0.0466 |
| Spanish American | C:B | 5702:0401 | 0.00179 | 1   | 0.00152  | 1        | 5.49823  | 1       | 0.1541 |

|                  |        |           |         |      |          |          |           |          |        |
|------------------|--------|-----------|---------|------|----------|----------|-----------|----------|--------|
| Spanish American | C:B    | 4403:1602 | 0.00179 | 1    | 0.00113  | 0.13656  | 1.18635   | 1        | 0.3674 |
| Spanish American | C:B    | 1801:1601 | 0.00179 | 1    | -0.00118 | -0.3961  | 0.29073   | 1        | 1.6559 |
| Spanish American | C:B    | 3508:1203 | 0.00179 | 1    | 0.00171  | 1        | 19.70197  | 1        | 0.0484 |
| Spanish American | C:B    | 1540:0303 | 0.00179 | 1    | 0.00175  | 1        | 45.58169  | 1        | 0.0215 |
| Spanish American | C:B    | 3920:1203 | 0.00179 | 1    | 0.00171  | 1        | 19.70197  | 1        | 0.0484 |
| Spanish American | C:B    | 4901:0602 | 0.00179 | 1    | 0.00002  | 0.00098  | 0.00013   | 1        | 0.9892 |
| Spanish American | C:B    | 3517:1509 | 0.00179 | 1    | 0.00172  | 0.32486  | 25.05641  | 1        | 0.0376 |
| Spanish American | C:B    | 3503:0702 | 0.00179 | 1    | -0.00013 | -0.07    | 0.00601   | 1        | 1.0753 |
| Spanish American | C:B    | 4005:0304 | 0.00179 | 1    | 0.00169  | 1        | 15.93765  | 1        | 0.0591 |
| Spanish American | C:B    | 1804:1212 | 0.00179 | 1    | 0.00179  | 1        | 558       | 1        | 0.0018 |
| Spanish American | C:B    | 4402:0202 | 0.00179 | 1    | 0.0001   | 0.00255  | 0.00332   | 1        | 0.9462 |
| Spanish American | C:B    | 3901:0702 | 0.00179 | 1    | 0.00121  | 0.25301  | 1.60259   | 1        | 0.3226 |
| Spanish American | C:B    | 3517:0304 | 0.00179 | 1    | 0.00105  | 0.08898  | 0.89291   | 1        | 0.414  |
| Spanish American | C:B    | 5601:0501 | 0.00179 | 1    | 0.00151  | 0.29679  | 4.84628   | 1        | 0.1559 |
| Spanish American | C:B    | 4403:0304 | 0.00179 | 1    | -0.00255 | -0.58758 | 0.96033   | 1        | 2.4247 |
| Spanish American | C:B    | 1401:1406 | 0.00179 | 1    | 0.00178  | 1        | 138.74865 | 1        | 0.0072 |
| Spanish American | C:B    | 5002:0602 | 0.00179 | 1    | 0.0015   | 0.45508  | 4.62672   | 1        | 0.1649 |
| Spanish American | C:B    | 5002:0401 | 0.00179 | 1    | 0.00124  | 0.4089   | 1.84189   | 1        | 0.3082 |
| Spanish American | C:B    | 1503:1203 | 0.00179 | 1    | 0.00092  | 0.05424  | 0.58909   | 1        | 0.4839 |
| Spanish American | C:B    | 3531:0305 | 0.00179 | 1    | 0.00177  | 1        | 92.16517  | 1        | 0.0108 |
| Spanish American | C:B    | 3503:0602 | 0.00179 | 1    | 0.00031  | 0.01914  | 0.04152   | 1        | 0.8244 |
| Spanish American | C:B    | 2703:0202 | 0.00179 | 1    | 0.00172  | 1        | 22.28995  | 1        | 0.043  |
| Spanish American | C:B    | 5001:0701 | 0.00179 | 1    | -0.00101 | -0.35936 | 0.23455   | 1        | 1.5609 |
| Spanish American | C:B    | 5108:1602 | 0.00179 | 1    | 0.00178  | 1        | 110.79856 | 1        | 0.009  |
| Spanish American | C:B    | 4101:0304 | 0.00173 | 1    | 0.0012   | 0.14256  | 1.6313    | 0.96636  | 0.2957 |
| Spanish American | C:DRB1 | 0701:0301 | 0.04404 | 24.6 | 0.03371  | 0.44531  | 76.31916  | 24.57173 | 5.7634 |
| Spanish American | C:DRB1 | 1601:0701 | 0.03843 | 21.4 | 0.03133  | 0.60209  | 93.17833  | 21.44557 | 3.9624 |
| Spanish American | C:DRB1 | 0702:1501 | 0.03001 | 16.7 | 0.02308  | 0.40078  | 51.30568  | 16.74778 | 3.871  |
| Spanish American | C:DRB1 | 0602:0701 | 0.02488 | 13.9 | 0.01498  | 0.20649  | 15.66488  | 13.88133 | 5.5233 |
| Spanish American | C:DRB1 | 0702:0407 | 0.02469 | 13.8 | 0.01814  | 0.33355  | 33.43434  | 13.77731 | 3.6559 |
| Spanish American | C:DRB1 | 0401:0101 | 0.02174 | 12.1 | 0.01318  | 0.28045  | 14.16879  | 12.13174 | 4.7778 |
| Spanish American | C:DRB1 | 0501:0301 | 0.0203  | 11.3 | 0.01582  | 0.33315  | 36.07249  | 11.3248  | 2.4946 |

|                  |        |           |         |      |          |          |          |          |         |
|------------------|--------|-----------|---------|------|----------|----------|----------|----------|---------|
| Spanish American | C:DRB1 | 0401:0802 | 0.01834 | 10.2 | 0.01061  | 0.24997  | 10.1096  | 10.23584 | 4.3154  |
| Spanish American | C:DRB1 | 0602:1001 | 0.01536 | 8.6  | 0.01315  | 0.53303  | 48.74573 | 8.57285  | 1.2366  |
| Spanish American | C:DRB1 | 0802:0102 | 0.01434 | 8    | 0.01306  | 0.42164  | 80.56219 | 7.99991  | 0.7097  |
| Spanish American | C:DRB1 | 0102:0802 | 0.01391 | 7.8  | 0.01158  | 0.26157  | 35.31686 | 7.76416  | 1.3047  |
| Spanish American | C:DRB1 | 0401:0701 | 0.01327 | 7.4  | -0.00524 | -0.28289 | 1.11023  | 7.40502  | 10.3262 |
| Spanish American | C:DRB1 | 0401:0407 | 0.01251 | 7    | 0.00312  | 0.06046  | 0.72641  | 6.97901  | 5.2401  |
| Spanish American | C:DRB1 | 0701:0701 | 0.0124  | 6.9  | -0.00202 | -0.13989 | 0.20334  | 6.91938  | 8.0448  |
| Spanish American | C:DRB1 | 0401:1501 | 0.0117  | 6.5  | 0.00176  | 0.03218  | 0.21865  | 6.52818  | 5.5484  |
| Spanish American | C:DRB1 | 0401:1104 | 0.01075 | 6    | 0.00633  | 0.26112  | 6.16436  | 6        | 2.4659  |
| Spanish American | C:DRB1 | 0202:0102 | 0.01075 | 6    | 0.00906  | 0.24004  | 29.36246 | 6        | 0.9462  |
| Spanish American | C:DRB1 | 1203:1501 | 0.01014 | 5.7  | 0.00702  | 0.15502  | 9.88705  | 5.65753  | 1.7419  |
| Spanish American | C:DRB1 | 0602:0301 | 0.00913 | 5.1  | 0.00204  | 0.02704  | 0.38934  | 5.09365  | 3.957   |
| Spanish American | C:DRB1 | 0304:0411 | 0.00896 | 5    | 0.00748  | 0.31673  | 22.91923 | 5        | 0.828   |
| Spanish American | C:DRB1 | 0802:0701 | 0.00896 | 5    | 0.00509  | 0.17918  | 4.37605  | 4.99922  | 2.1613  |
| Spanish American | C:DRB1 | 0701:1301 | 0.00874 | 4.9  | 0.00207  | 0.04243  | 0.43306  | 4.87964  | 3.7222  |
| Spanish American | C:DRB1 | 0501:1301 | 0.00838 | 4.7  | 0.00549  | 0.11187  | 6.50848  | 4.6752   | 1.6111  |
| Spanish American | C:DRB1 | 0401:0404 | 0.00819 | 4.6  | 0.00073  | 0.01793  | 0.05007  | 4.57083  | 4.1613  |
| Spanish American | C:DRB1 | 0304:0404 | 0.0079  | 4.4  | 0.00503  | 0.11057  | 5.51826  | 4.40554  | 1.5968  |
| Spanish American | C:DRB1 | 1601:1301 | 0.00787 | 4.4  | 0.00459  | 0.08777  | 4.02251  | 4.39322  | 1.8333  |
| Spanish American | C:DRB1 | 0102:0404 | 0.00782 | 4.4  | 0.00556  | 0.12545  | 8.44096  | 4.36203  | 1.2581  |
| Spanish American | C:DRB1 | 0401:1101 | 0.00746 | 4.2  | 0.00111  | 0.03172  | 0.13248  | 4.16195  | 3.5448  |
| Spanish American | C:DRB1 | 0702:1104 | 0.00717 | 4    | 0.00409  | 0.15964  | 3.48424  | 4        | 1.7204  |
| Spanish American | C:DRB1 | 0702:1406 | 0.00717 | 4    | 0.00543  | 0.37751  | 10.8203  | 4        | 0.9677  |
| Spanish American | C:DRB1 | 0401:1401 | 0.00717 | 4    | 0.00441  | 0.29068  | 4.72195  | 4        | 1.5412  |
| Spanish American | C:DRB1 | 0701:1302 | 0.00717 | 4    | 0.0033   | 0.11609  | 1.83699  | 4        | 2.1613  |
| Spanish American | C:DRB1 | 0304:1602 | 0.00717 | 4    | 0.0059   | 0.29143  | 16.57038 | 4        | 0.7097  |
| Spanish American | C:DRB1 | 0202:1101 | 0.00688 | 3.8  | 0.00511  | 0.12943  | 8.94115  | 3.83805  | 0.9892  |
| Spanish American | C:DRB1 | 0701:1303 | 0.00649 | 3.6  | 0.0052   | 0.54908  | 13.40063 | 3.61934  | 0.7204  |
| Spanish American | C:DRB1 | 1203:0701 | 0.00599 | 3.3  | 0.00018  | 0.00423  | 0.00372  | 3.34247  | 3.2419  |
| Spanish American | C:DRB1 | 1502:0407 | 0.00592 | 3.3  | 0.00407  | 0.14219  | 5.46343  | 3.30576  | 1.0358  |
| Spanish American | C:DRB1 | 0602:1301 | 0.00575 | 3.2  | 0.00117  | 0.02295  | 0.19248  | 3.20845  | 2.5556  |
| Spanish American | C:DRB1 | 0702:0101 | 0.00571 | 3.2  | -0.00026 | -0.04429 | 0.00776  | 3.18571  | 3.3333  |

|                  |        |           |         |     |          |          |          |         |        |
|------------------|--------|-----------|---------|-----|----------|----------|----------|---------|--------|
| Spanish American | C:DRB1 | 0602:1501 | 0.00548 | 3.1 | 0.00016  | 0.00269  | 0.00311  | 3.0567  | 2.9677 |
| Spanish American | C:DRB1 | 0501:1101 | 0.00538 | 3   | 0.00323  | 0.08276  | 2.99749  | 3       | 1.1953 |
| Spanish American | C:DRB1 | 0305:0407 | 0.00538 | 3   | 0.00472  | 0.46756  | 20.4347  | 3       | 0.3656 |
| Spanish American | C:DRB1 | 0401:1503 | 0.00538 | 3   | 0.00289  | 0.21186  | 2.25353  | 3       | 1.3871 |
| Spanish American | C:DRB1 | 0401:1402 | 0.00538 | 3   | 0.00317  | 0.26112  | 3.03735  | 3       | 1.233  |
| Spanish American | C:DRB1 | 0501:0401 | 0.00538 | 3   | 0.00417  | 0.1886   | 8.63616  | 3       | 0.6756 |
| Spanish American | C:DRB1 | 1203:1502 | 0.00538 | 3   | 0.00486  | 0.47458  | 26.86514 | 3       | 0.2903 |
| Spanish American | C:DRB1 | 0304:0401 | 0.00538 | 3   | 0.004    | 0.18242  | 7.04628  | 3       | 0.7688 |
| Spanish American | C:DRB1 | 0304:1302 | 0.00538 | 3   | 0.00347  | 0.11429  | 3.86494  | 3       | 1.0645 |
| Spanish American | C:DRB1 | 0602:0901 | 0.00538 | 3   | 0.00375  | 0.20739  | 5.3717   | 3       | 0.9068 |
| Spanish American | C:DRB1 | 0202:0901 | 0.00538 | 3   | 0.00453  | 0.24004  | 14.386   | 3       | 0.4731 |
| Spanish American | C:DRB1 | 0801:0802 | 0.00538 | 3   | 0.00457  | 0.29811  | 15.38809 | 3       | 0.4516 |
| Spanish American | C:DRB1 | 0701:1503 | 0.00538 | 3   | 0.00344  | 0.24236  | 3.93769  | 3       | 1.0806 |
| Spanish American | C:DRB1 | 0102:0101 | 0.00509 | 2.8 | 0.0025   | 0.05683  | 1.49742  | 2.84001 | 1.4444 |
| Spanish American | C:DRB1 | 1502:0101 | 0.00502 | 2.8 | 0.00333  | 0.11566  | 3.98725  | 2.80137 | 0.9444 |
| Spanish American | C:DRB1 | 0304:0407 | 0.00487 | 2.7 | 0.00126  | 0.02273  | 0.27935  | 2.71523 | 2.0108 |
| Spanish American | C:DRB1 | 0303:0701 | 0.00458 | 2.6 | 0.002    | 0.10551  | 1.00045  | 2.55493 | 1.4409 |
| Spanish American | C:DRB1 | 0401:1303 | 0.00427 | 2.4 | 0.00261  | 0.28687  | 2.73938  | 2.38066 | 0.9247 |
| Spanish American | C:DRB1 | 0401:1301 | 0.0042  | 2.3 | -0.00437 | -0.51005 | 1.55588  | 2.34085 | 4.7778 |
| Spanish American | C:DRB1 | 0401:1001 | 0.00406 | 2.3 | -0.00008 | -0.01985 | 0.00111  | 2.26593 | 2.3118 |
| Spanish American | C:DRB1 | 0303:0407 | 0.00392 | 2.2 | 0.00261  | 0.12936  | 3.16269  | 2.18889 | 0.7312 |
| Spanish American | C:DRB1 | 1602:0701 | 0.00392 | 2.2 | 0.00284  | 0.36063  | 4.80858  | 2.18701 | 0.6004 |
| Spanish American | C:DRB1 | 0202:0101 | 0.00387 | 2.2 | 0.00148  | 0.03656  | 0.56975  | 2.16195 | 1.3333 |
| Spanish American | C:DRB1 | 0702:0404 | 0.00364 | 2   | -0.00156 | -0.29947 | 0.30657  | 2.0338  | 2.9032 |
| Spanish American | C:DRB1 | 0701:1501 | 0.0036  | 2   | -0.00414 | -0.53504 | 1.50327  | 2.00982 | 4.3226 |
| Spanish American | C:DRB1 | 0701:0102 | 0.00358 | 2   | -0.00115 | -0.24284 | 0.1843   | 2.00009 | 2.6416 |
| Spanish American | C:DRB1 | 0801:0404 | 0.00358 | 2   | 0.0028   | 0.18267  | 6.00329  | 2       | 0.4355 |
| Spanish American | C:DRB1 | 0306:0802 | 0.00358 | 2   | 0.0034   | 1        | 37.99332 | 2       | 0.1004 |
| Spanish American | C:DRB1 | 0602:1201 | 0.00358 | 2   | 0.00299  | 0.45508  | 9.28685  | 2       | 0.3297 |
| Spanish American | C:DRB1 | 0401:0411 | 0.00358 | 2   | -0.00028 | -0.07309 | 0.01398  | 2       | 2.1577 |
| Spanish American | C:DRB1 | 0701:1104 | 0.00358 | 2   | 0.00014  | 0.0056   | 0.00379  | 2       | 1.9211 |
| Spanish American | C:DRB1 | 0701:0404 | 0.00358 | 2   | -0.00223 | -0.38308 | 0.56818  | 2       | 3.2419 |

|                  |        |           |         |   |          |          |          |   |        |
|------------------|--------|-----------|---------|---|----------|----------|----------|---|--------|
| Spanish American | C:DRB1 | 0303:0802 | 0.00358 | 2 | 0.00251  | 0.12264  | 3.49153  | 2 | 0.6022 |
| Spanish American | C:DRB1 | 0304:0901 | 0.00358 | 2 | 0.00242  | 0.13039  | 3.03509  | 2 | 0.6505 |
| Spanish American | C:DRB1 | 0701:1102 | 0.00358 | 2 | 0.00272  | 0.43177  | 5.50427  | 2 | 0.4803 |
| Spanish American | C:DRB1 | 0701:0405 | 0.00358 | 2 | 0.00251  | 0.31813  | 3.74184  | 2 | 0.6004 |
| Spanish American | C:DRB1 | 0702:0103 | 0.00358 | 2 | 0.00301  | 0.62651  | 9.82632  | 2 | 0.3226 |
| Spanish American | C:DRB1 | 1502:0402 | 0.00358 | 2 | 0.00326  | 0.31238  | 18.83535 | 2 | 0.1828 |
| Spanish American | C:DRB1 | 0102:1406 | 0.00358 | 2 | 0.00283  | 0.18421  | 6.35143  | 2 | 0.4194 |
| Spanish American | C:DRB1 | 1502:0411 | 0.00358 | 2 | 0.00282  | 0.11592  | 6.14116  | 2 | 0.4265 |
| Spanish American | C:DRB1 | 1203:0101 | 0.00358 | 2 | 0.0009   | 0.01961  | 0.18544  | 2 | 1.5    |
| Spanish American | C:DRB1 | 0702:1401 | 0.00358 | 2 | 0.00166  | 0.10361  | 0.90735  | 2 | 1.0753 |
| Spanish American | C:DRB1 | 1202:1502 | 0.00358 | 2 | 0.00351  | 0.49457  | 90.66077 | 2 | 0.043  |
| Spanish American | C:DRB1 | 0401:0302 | 0.00358 | 2 | 0.00165  | 0.15557  | 0.94161  | 2 | 1.0789 |
| Spanish American | C:DRB1 | 0210:0102 | 0.00358 | 2 | 0.00288  | 0.16716  | 6.93238  | 2 | 0.3943 |
| Spanish American | C:DRB1 | 0702:1402 | 0.00358 | 2 | 0.00204  | 0.15964  | 1.71678  | 2 | 0.8602 |
| Spanish American | C:DRB1 | 0702:0411 | 0.00358 | 2 | 0.00089  | 0.03959  | 0.18679  | 2 | 1.5054 |
| Spanish American | C:DRB1 | 0702:0302 | 0.00358 | 2 | 0.00224  | 0.19966  | 2.34543  | 2 | 0.7527 |
| Spanish American | C:DRB1 | 0702:0403 | 0.00358 | 2 | 0.00204  | 0.15964  | 1.71678  | 2 | 0.8602 |
| Spanish American | C:DRB1 | 1402:1301 | 0.00358 | 2 | 0.00259  | 0.15294  | 4.04903  | 2 | 0.5556 |
| Spanish American | C:DRB1 | 1801:1302 | 0.00358 | 2 | 0.00306  | 0.1963   | 10.57426 | 2 | 0.2903 |
| Spanish American | C:DRB1 | 0202:0701 | 0.00358 | 2 | -0.00158 | -0.30597 | 0.32037  | 2 | 2.8817 |
| Spanish American | C:DRB1 | 0102:1503 | 0.00358 | 2 | 0.00283  | 0.18421  | 6.35143  | 2 | 0.4194 |
| Spanish American | C:DRB1 | 1203:1101 | 0.00358 | 2 | 0.00159  | 0.04053  | 0.77501  | 2 | 1.1129 |
| Spanish American | C:DRB1 | 0210:0301 | 0.00358 | 2 | 0.00204  | 0.12471  | 1.68251  | 2 | 0.8602 |
| Spanish American | C:DRB1 | 1601:1302 | 0.00358 | 2 | 0.00168  | 0.05524  | 0.90289  | 2 | 1.0645 |
| Spanish American | C:DRB1 | 0501:0402 | 0.00358 | 2 | 0.00303  | 0.29679  | 9.74523  | 2 | 0.3118 |
| Spanish American | C:DRB1 | 0801:1402 | 0.00358 | 2 | 0.00335  | 0.2377   | 27.97484 | 2 | 0.129  |
| Spanish American | C:DRB1 | 1203:0403 | 0.00358 | 2 | 0.00289  | 0.21186  | 7.16487  | 2 | 0.3871 |
| Spanish American | C:DRB1 | 0401:0405 | 0.00358 | 2 | 0.0022   | 0.29068  | 2.33963  | 2 | 0.7706 |
| Spanish American | C:DRB1 | 0602:1102 | 0.00358 | 2 | 0.00299  | 0.45508  | 9.28685  | 2 | 0.3297 |
| Spanish American | C:DRB1 | 1701:1302 | 0.00358 | 2 | 0.0033   | 0.38     | 21.85584 | 2 | 0.1613 |
| Spanish American | C:DRB1 | 1701:0302 | 0.00358 | 2 | 0.00347  | 0.39238  | 61.14216 | 2 | 0.0627 |
| Spanish American | C:DRB1 | 0210:1101 | 0.00358 | 2 | 0.00285  | 0.16561  | 6.4959   | 2 | 0.4122 |

|                  |        |           |         |     |          |          |          |         |        |
|------------------|--------|-----------|---------|-----|----------|----------|----------|---------|--------|
| Spanish American | C:DRB1 | 1601:1401 | 0.00358 | 2   | 0.00252  | 0.14971  | 3.63099  | 2       | 0.5914 |
| Spanish American | C:DRB1 | 1509:0404 | 0.00358 | 2   | 0.00332  | 0.64972  | 25.04046 | 2       | 0.1452 |
| Spanish American | C:DRB1 | 0304:0802 | 0.00358 | 2   | 0.00062  | 0.01306  | 0.08001  | 2       | 1.6559 |
| Spanish American | C:DRB1 | 1801:1301 | 0.00358 | 2   | 0.00269  | 0.17647  | 4.84282  | 2       | 0.5    |
| Spanish American | C:DRB1 | 0304:0101 | 0.00337 | 1.9 | 0.00008  | 0.00157  | 0.00129  | 1.87923 | 1.8333 |
| Spanish American | C:DRB1 | 1502:0404 | 0.00292 | 1.6 | 0.00144  | 0.04977  | 0.85434  | 1.6278  | 0.8226 |
| Spanish American | C:DRB1 | 0303:1301 | 0.00259 | 1.4 | 0.00139  | 0.06868  | 0.98348  | 1.44507 | 0.6667 |
| Spanish American | C:DRB1 | 1502:0701 | 0.00227 | 1.3 | -0.00139 | -0.38024 | 0.34593  | 1.26507 | 2.0412 |
| Spanish American | C:DRB1 | 0702:0401 | 0.00213 | 1.2 | -0.00037 | -0.14949 | 0.03584  | 1.18889 | 1.3978 |
| Spanish American | C:DRB1 | 0602:1101 | 0.00213 | 1.2 | -0.00127 | -0.37396 | 0.3014   | 1.18701 | 1.8961 |
| Spanish American | C:DRB1 | 1601:1001 | 0.00208 | 1.2 | 0.00049  | 0.01942  | 0.09252  | 1.16122 | 0.8871 |
| Spanish American | C:DRB1 | 0702:1301 | 0.00189 | 1.1 | -0.00408 | -0.68299 | 1.84474  | 1.0567  | 3.3333 |
| Spanish American | C:DRB1 | 0102:0407 | 0.00185 | 1   | -0.00099 | -0.34744 | 0.2136   | 1.0338  | 1.5842 |
| Spanish American | C:DRB1 | 0702:0301 | 0.00181 | 1   | -0.00744 | -0.80435 | 4.09369  | 1.00982 | 5.1613 |
| Spanish American | C:DRB1 | 0704:1302 | 0.00179 | 1   | 0.00139  | 0.11429  | 2.7777   | 1       | 0.2258 |
| Spanish American | C:DRB1 | 0704:1301 | 0.00179 | 1   | 0.0011   | 0.09244  | 1.02972  | 1       | 0.3889 |
| Spanish American | C:DRB1 | 1203:1104 | 0.00179 | 1   | 0.0004   | 0.01483  | 0.07125  | 1       | 0.7742 |
| Spanish American | C:DRB1 | 1203:0901 | 0.00179 | 1   | 0.00084  | 0.04468  | 0.44063  | 1       | 0.5323 |
| Spanish American | C:DRB1 | 1205:1101 | 0.00179 | 1   | 0.00172  | 1        | 23.30263 | 1       | 0.0412 |
| Spanish American | C:DRB1 | 0210:1304 | 0.00179 | 1   | 0.00173  | 0.49088  | 26.50412 | 1       | 0.0358 |
| Spanish American | C:DRB1 | 0305:0404 | 0.00179 | 1   | 0.00127  | 0.12429  | 1.84279  | 1       | 0.2903 |
| Spanish American | C:DRB1 | 0304:1501 | 0.00179 | 1   | -0.00202 | -0.5303  | 0.68025  | 1       | 2.129  |
| Spanish American | C:DRB1 | 1509:1406 | 0.00179 | 1   | 0.00171  | 0.3224   | 19.12468 | 1       | 0.0484 |
| Spanish American | C:DRB1 | 0202:0411 | 0.00179 | 1   | 0.00071  | 0.0297   | 0.28175  | 1       | 0.6022 |
| Spanish American | C:DRB1 | 1801:1304 | 0.00179 | 1   | 0.00173  | 0.4918   | 29.61434 | 1       | 0.0323 |
| Spanish American | C:DRB1 | 1402:1104 | 0.00179 | 1   | 0.00128  | 0.07343  | 1.85995  | 1       | 0.2867 |
| Spanish American | C:DRB1 | 0501:1306 | 0.00179 | 1   | 0.0017   | 1        | 18.27413 | 1       | 0.052  |
| Spanish American | C:DRB1 | 1801:0301 | 0.00179 | 1   | 0.0004   | 0.02745  | 0.07324  | 1       | 0.7742 |
| Spanish American | C:DRB1 | 1801:1201 | 0.00179 | 1   | 0.00168  | 0.2377   | 13.88643 | 1       | 0.0645 |
| Spanish American | C:DRB1 | 0704:1104 | 0.00179 | 1   | 0.00143  | 0.11755  | 3.31845  | 1       | 0.2007 |
| Spanish American | C:DRB1 | 0704:1602 | 0.00179 | 1   | 0.00152  | 0.12402  | 4.96098  | 1       | 0.1505 |
| Spanish American | C:DRB1 | 0501:0901 | 0.00179 | 1   | 0.00077  | 0.04107  | 0.3453   | 1       | 0.5717 |

|                  |        |           |         |   |          |          |          |   |        |
|------------------|--------|-----------|---------|---|----------|----------|----------|---|--------|
| Spanish American | C:DRB1 | 0202:1401 | 0.00179 | 1 | 0.00102  | 0.05955  | 0.80344  | 1 | 0.4301 |
| Spanish American | C:DRB1 | 1402:0404 | 0.00179 | 1 | 0.00092  | 0.05424  | 0.58909  | 1 | 0.4839 |
| Spanish American | C:DRB1 | 0302:0301 | 0.00179 | 1 | 0.00102  | 0.12471  | 0.83365  | 1 | 0.4301 |
| Spanish American | C:DRB1 | 0704:0404 | 0.00179 | 1 | 0.00119  | 0.09927  | 1.37398  | 1 | 0.3387 |
| Spanish American | C:DRB1 | 1203:1503 | 0.00179 | 1 | 0.00101  | 0.06591  | 0.7816   | 1 | 0.4355 |
| Spanish American | C:DRB1 | 0701:1502 | 0.00179 | 1 | 0.0005   | 0.05295  | 0.12463  | 1 | 0.7204 |
| Spanish American | C:DRB1 | 1502:1406 | 0.00179 | 1 | 0.0013   | 0.08318  | 2.01411  | 1 | 0.2742 |
| Spanish American | C:DRB1 | 1402:0302 | 0.00179 | 1 | 0.00157  | 0.12722  | 6.287    | 1 | 0.1254 |
| Spanish American | C:DRB1 | 0305:0411 | 0.00179 | 1 | 0.00152  | 0.14522  | 4.9702   | 1 | 0.1505 |
| Spanish American | C:DRB1 | 0305:0807 | 0.00179 | 1 | 0.00177  | 1        | 92.16517 | 1 | 0.0108 |
| Spanish American | C:DRB1 | 0802:1201 | 0.00179 | 1 | 0.00156  | 0.225    | 6.11886  | 1 | 0.129  |
| Spanish American | C:DRB1 | 0701:0401 | 0.00179 | 1 | -0.00101 | -0.35936 | 0.23455  | 1 | 1.5609 |
| Spanish American | C:DRB1 | 1502:1101 | 0.00179 | 1 | 0.00054  | 0.01836  | 0.13751  | 1 | 0.7007 |
| Spanish American | C:DRB1 | 0704:1101 | 0.00179 | 1 | 0.00128  | 0.10601  | 1.85304  | 1 | 0.2885 |
| Spanish American | C:DRB1 | 0102:1405 | 0.00179 | 1 | 0.00171  | 1        | 20.49827 | 1 | 0.0466 |
| Spanish American | C:DRB1 | 1502:1301 | 0.00179 | 1 | 0.0001   | 0.00346  | 0.00357  | 1 | 0.9444 |
| Spanish American | C:DRB1 | 0501:0101 | 0.00179 | 1 | -0.0011  | -0.37931 | 0.25889  | 1 | 1.6111 |
| Spanish American | C:DRB1 | 1203:1103 | 0.00179 | 1 | 0.00153  | 0.29944  | 5.31861  | 1 | 0.1452 |
| Spanish American | C:DRB1 | 0802:1101 | 0.00179 | 1 | 0.00046  | 0.01495  | 0.09674  | 1 | 0.7419 |
| Spanish American | C:DRB1 | 0802:1501 | 0.00179 | 1 | -0.00029 | -0.13889 | 0.02474  | 1 | 1.1613 |
| Spanish American | C:DRB1 | 0401:1602 | 0.00179 | 1 | -0.00152 | -0.4593  | 0.47139  | 1 | 1.8495 |
| Spanish American | C:DRB1 | 0210:1602 | 0.00179 | 1 | 0.00141  | 0.08022  | 2.98145  | 1 | 0.2151 |
| Spanish American | C:DRB1 | 0701:0408 | 0.00179 | 1 | 0.00158  | 1        | 7.34152  | 1 | 0.1201 |
| Spanish American | C:DRB1 | 0302:0701 | 0.00179 | 1 | 0.00072  | 0.09084  | 0.30507  | 1 | 0.6004 |
| Spanish American | C:DRB1 | 0302:0901 | 0.00179 | 1 | 0.00162  | 0.18391  | 8.48584  | 1 | 0.0986 |
| Spanish American | C:DRB1 | 0602:0401 | 0.00179 | 1 | -0.00013 | -0.06689 | 0.00535  | 1 | 1.0717 |
| Spanish American | C:DRB1 | 0202:0403 | 0.00179 | 1 | 0.00118  | 0.08567  | 1.32553  | 1 | 0.3441 |
| Spanish American | C:DRB1 | 1402:1001 | 0.00179 | 1 | 0.00131  | 0.07514  | 2.08105  | 1 | 0.2688 |
| Spanish American | C:DRB1 | 1203:1407 | 0.00179 | 1 | 0.00171  | 1        | 19.70197 | 1 | 0.0484 |
| Spanish American | C:DRB1 | 0202:0402 | 0.00179 | 1 | 0.00133  | 0.12921  | 2.25316  | 1 | 0.2581 |
| Spanish American | C:DRB1 | 0210:1302 | 0.00179 | 1 | 0.00121  | 0.07     | 1.49682  | 1 | 0.3226 |
| Spanish American | C:DRB1 | 0701:1101 | 0.00179 | 1 | -0.00316 | -0.6379  | 1.332    | 1 | 2.7616 |



|                  |        |           |         |   |          |          |          |   |        |
|------------------|--------|-----------|---------|---|----------|----------|----------|---|--------|
| Spanish American | C:DRB1 | 0304:1301 | 0.00179 | 1 | -0.00149 | -0.45455 | 0.42628  | 1 | 1.8333 |
| Spanish American | C:DRB1 | 0303:0101 | 0.00179 | 1 | 0.0006   | 0.02941  | 0.18035  | 1 | 0.6667 |
| Spanish American | C:DRB1 | 1602:0402 | 0.00179 | 1 | 0.0017   | 0.1913   | 16.987   | 1 | 0.0538 |
| Spanish American | C:DRB1 | 0801:0103 | 0.00179 | 1 | 0.00171  | 0.3224   | 19.12468 | 1 | 0.0484 |
| Spanish American | C:DRB1 | 0303:1103 | 0.00179 | 1 | 0.00168  | 0.31868  | 13.93757 | 1 | 0.0645 |
| Spanish American | C:DRB1 | 1203:1301 | 0.00179 | 1 | -0.0009  | -0.33333 | 0.18544  | 1 | 1.5    |
| Spanish American | C:DRB1 | 1601:1404 | 0.00179 | 1 | 0.00158  | 0.46857  | 7.0111   | 1 | 0.1183 |
| Spanish American | C:DRB1 | 0102:1101 | 0.00179 | 1 | -0.00013 | -0.06689 | 0.00525  | 1 | 1.0717 |
| Spanish American | C:DRB1 | 1701:0101 | 0.00179 | 1 | 0.00129  | 0.15294  | 2.00621  | 1 | 0.2778 |
| Spanish American | C:DRB1 | 0102:0401 | 0.00179 | 1 | 0.00071  | 0.03181  | 0.27558  | 1 | 0.6057 |
| Spanish American | C:DRB1 | 0801:0403 | 0.00179 | 1 | 0.00156  | 0.11066  | 6.06232  | 1 | 0.129  |
| Spanish American | C:DRB1 | 1203:0804 | 0.00179 | 1 | 0.00162  | 0.47458  | 8.89062  | 1 | 0.0968 |
| Spanish American | C:DRB1 | 0401:0102 | 0.00179 | 1 | -0.00428 | -0.70507 | 2.07452  | 1 | 3.3907 |
| Spanish American | C:DRB1 | 0802:0101 | 0.00179 | 1 | 0        | 0        | 0        | 1 | 1      |
| Spanish American | C:DRB1 | 1402:1302 | 0.00179 | 1 | 0.00121  | 0.07     | 1.49682  | 1 | 0.3226 |
| Spanish American | C:DRB1 | 0401:0803 | 0.00179 | 1 | 0.00152  | 1        | 5.49823  | 1 | 0.1541 |
| Spanish American | C:DRB1 | 0302:0403 | 0.00179 | 1 | 0.00166  | 0.18836  | 12.30682 | 1 | 0.0717 |
| Spanish American | C:DRB1 | 0401:1601 | 0.00179 | 1 | 0.00069  | 0.11335  | 0.28409  | 1 | 0.6165 |
| Spanish American | C:DRB1 | 1212:1104 | 0.00179 | 1 | 0.00174  | 1        | 33.93582 | 1 | 0.0287 |
| Spanish American | C:DRB1 | 0704:1601 | 0.00179 | 1 | 0.0017   | 0.24047  | 18.33862 | 1 | 0.0502 |
| Spanish American | C:DRB1 | 0210:1404 | 0.00179 | 1 | 0.00173  | 0.49088  | 26.50412 | 1 | 0.0358 |
| Spanish American | C:DRB1 | 1202:0407 | 0.00179 | 1 | 0.00136  | 0.20134  | 2.51698  | 1 | 0.2437 |
| Spanish American | C:DRB1 | 0304:1402 | 0.00179 | 1 | 0.00094  | 0.07     | 0.63271  | 1 | 0.4731 |
| Spanish American | C:DRB1 | 0602:0102 | 0.00179 | 1 | -0.00146 | -0.44862 | 0.41412  | 1 | 1.8136 |
| Spanish American | C:DRB1 | 1801:0401 | 0.00179 | 1 | 0.00142  | 0.08991  | 3.09996  | 1 | 0.2097 |
| Spanish American | C:DRB1 | 0102:1001 | 0.00179 | 1 | 0.00054  | 0.02105  | 0.13979  | 1 | 0.6989 |
| Spanish American | C:DRB1 | 0501:0404 | 0.00179 | 1 | -0.00072 | -0.28736 | 0.12844  | 1 | 1.4032 |
| Spanish American | C:DRB1 | 0602:1406 | 0.00179 | 1 | 0.00046  | 0.03125  | 0.09943  | 1 | 0.7419 |
| Spanish American | C:DRB1 | 0202:0802 | 0.00179 | 1 | -0.00037 | -0.16964 | 0.03813  | 1 | 1.2043 |
| Spanish American | C:DRB1 | 0202:0401 | 0.00179 | 1 | 0.00079  | 0.03544  | 0.37189  | 1 | 0.5591 |
| Spanish American | C:DRB1 | 1402:0102 | 0.00179 | 1 | 0.00109  | 0.06306  | 0.98651  | 1 | 0.3943 |
| Spanish American | C:DRB1 | 0701:0403 | 0.00179 | 1 | 0.00007  | 0.0056   | 0.00187  | 1 | 0.9606 |

|                  |        |           |         |     |          |          |          |         |        |
|------------------|--------|-----------|---------|-----|----------|----------|----------|---------|--------|
| Spanish American | C:DRB1 | 0304:0410 | 0.00179 | 1   | 0.00158  | 0.46857  | 7.0111   | 1       | 0.1183 |
| Spanish American | C:DRB1 | 0701:0804 | 0.00179 | 1   | 0.00136  | 0.43177  | 2.74224  | 1       | 0.2401 |
| Spanish American | C:DRB1 | 1203:0102 | 0.00179 | 1   | -0.00012 | -0.06061 | 0.00428  | 1       | 1.0645 |
| Spanish American | C:DRB1 | 1406:0411 | 0.00179 | 1   | 0.00175  | 1        | 38.9269  | 1       | 0.0251 |
| Spanish American | C:DRB1 | 0602:0406 | 0.00179 | 1   | 0.00164  | 1        | 11.15042 | 1       | 0.0824 |
| Spanish American | C:DRB1 | 1202:0301 | 0.00179 | 1   | 0.00118  | 0.17941  | 1.37789  | 1       | 0.3441 |
| Spanish American | C:DRB1 | 0701:1305 | 0.00179 | 1   | 0.00158  | 1        | 7.34152  | 1       | 0.1201 |
| Spanish American | C:DRB1 | 0303:1401 | 0.00179 | 1   | 0.00141  | 0.08022  | 2.98145  | 1       | 0.2151 |
| Spanish American | C:DRB1 | 1502:0801 | 0.00179 | 1   | 0.00163  | 0.31238  | 9.36677  | 1       | 0.0914 |
| Spanish American | C:DRB1 | 0102:0410 | 0.00179 | 1   | 0.00163  | 0.47556  | 9.2885   | 1       | 0.0932 |
| Spanish American | C:DRB1 | 0701:1601 | 0.00179 | 1   | 0.00093  | 0.14766  | 0.64373  | 1       | 0.4803 |
| Spanish American | C:DRB1 | 1203:1601 | 0.00179 | 1   | 0.00145  | 0.21186  | 3.55657  | 1       | 0.1935 |
| Spanish American | C:DRB1 | 1505:1301 | 0.00179 | 1   | 0.00159  | 0.47059  | 7.5565   | 1       | 0.1111 |
| Spanish American | C:DRB1 | 0802:0405 | 0.00179 | 1   | 0.0015   | 0.17333  | 4.54741  | 1       | 0.1613 |
| Spanish American | C:DRB1 | 0401:0801 | 0.00179 | 1   | 0.00096  | 0.21186  | 0.74306  | 1       | 0.4624 |
| Spanish American | C:DRB1 | 0302:0801 | 0.00179 | 1   | 0.00174  | 0.32731  | 35.73753 | 1       | 0.0269 |
| Spanish American | C:DRB1 | 0304:1001 | 0.00179 | 1   | 0.0002   | 0.008    | 0.01569  | 1       | 0.8871 |
| Spanish American | C:DRB1 | 1801:1602 | 0.00179 | 1   | 0.00145  | 0.09158  | 3.49036  | 1       | 0.1935 |
| Spanish American | C:DRB1 | 0702:1602 | 0.00179 | 1   | -0.00052 | -0.225   | 0.0748   | 1       | 1.2903 |
| Spanish American | C:DRB1 | 0501:1602 | 0.00179 | 1   | 0.00067  | 0.03308  | 0.24482  | 1       | 0.6237 |
| Spanish American | C:DRB1 | 1402:1314 | 0.00179 | 1   | 0.00176  | 1        | 54.89838 | 1       | 0.0179 |
| Spanish American | C:DRB1 | 1601:1103 | 0.00179 | 1   | 0.00147  | 0.29143  | 4.07542  | 1       | 0.1774 |
| Spanish American | C:DRB1 | 0202:1302 | 0.00179 | 1   | 0.0004   | 0.01311  | 0.07111  | 1       | 0.7742 |
| Spanish American | C:DRB1 | 0102:1302 | 0.00179 | 1   | 0.00029  | 0.0094   | 0.03362  | 1       | 0.8387 |
| Spanish American | C:DRB1 | 1402:1602 | 0.00179 | 1   | 0.00141  | 0.08022  | 2.98145  | 1       | 0.2151 |
| Spanish American | C:DRB1 | 1602:1602 | 0.00179 | 1   | 0.0016   | 0.18242  | 7.63878  | 1       | 0.1075 |
| Spanish American | C:DRB1 | 1505:0301 | 0.00179 | 1   | 0.00148  | 0.45294  | 4.37524  | 1       | 0.172  |
| Spanish American | C:DRB1 | 1602:1101 | 0.00146 | 0.8 | 0.00109  | 0.1266   | 1.88083  | 0.81299 | 0.2061 |
| Spanish American | C:DRB1 | 0303:0401 | 0.00145 | 0.8 | 0.00095  | 0.04535  | 1.05747  | 0.81111 | 0.2796 |
