# Supplementary material
Source: PubMed Central journal article supplement (PMC3045865)
Supplement: NIHMS246688-supplement-Table_S4.pdf [file NIHMS246688-supplement-Table_S4.pdf]

**Supplemental Table S5.** A:B:C:DRB1 Haplotypes in Italian and Spanish Americans.

| Locus Set  | Haplotype           | Italian American    |                 | Spanish American    |                 |
|------------|---------------------|---------------------|-----------------|---------------------|-----------------|
|            |                     | Haplotype Frequency | Haplotype Count | Haplotype Frequency | Haplotype Count |
| A:C:B:DRB1 | 0101:0102:1501:1501 |                     |                 | 0.00179             | 1               |
| A:C:B:DRB1 | 0101:0102:1801:1401 | 0.00183             | 1               |                     |                 |
| A:C:B:DRB1 | 0101:0202:4002:1303 |                     |                 | 0.00179             | 1               |
| A:C:B:DRB1 | 0101:0210:1503:0301 |                     |                 | 0.00179             | 1               |
| A:C:B:DRB1 | 0101:0302:5801:0403 | 0.00183             | 1               |                     |                 |
| A:C:B:DRB1 | 0101:0303:1501:0901 | 0.00183             | 1               |                     |                 |
| A:C:B:DRB1 | 0101:0303:1501:1101 | 0.00183             | 1               |                     |                 |
| A:C:B:DRB1 | 0101:0401:1401:0701 |                     |                 | 0.00179             | 1               |
| A:C:B:DRB1 | 0101:0401:3501:0101 |                     |                 | 0.00277             | 1.5             |
| A:C:B:DRB1 | 0101:0401:3502:1104 | 0.00366             | 2               | 0.00179             | 1               |
| A:C:B:DRB1 | 0101:0401:3503:0701 | 0.00366             | 2               |                     |                 |
| A:C:B:DRB1 | 0101:0401:3701:0401 | 0.00183             | 1               |                     |                 |
| A:C:B:DRB1 | 0101:0401:4402:0402 |                     |                 | 0.00179             | 1               |
| A:C:B:DRB1 | 0101:0401:5301:1301 |                     |                 | 0.00179             | 1               |
| A:C:B:DRB1 | 0101:0501:4402:0401 | 0.00366             | 2               |                     |                 |
| A:C:B:DRB1 | 0101:0501:5501:1302 |                     |                 | 0.00179             | 1               |
| A:C:B:DRB1 | 0101:0602:1302:0701 | 0.00183             | 1               |                     |                 |
| A:C:B:DRB1 | 0101:0602:1302:1001 |                     |                 | 0.00179             | 1               |
| A:C:B:DRB1 | 0101:0602:3503:0801 | 0.00183             | 1               |                     |                 |
| A:C:B:DRB1 | 0101:0602:3701:1001 |                     |                 | 0.00358             | 2               |
| A:C:B:DRB1 | 0101:0602:3701:1401 | 0.00183             | 1               |                     |                 |
| A:C:B:DRB1 | 0101:0602:3701:1501 | 0.00366             | 2               |                     |                 |
| A:C:B:DRB1 | 0101:0602:5001:1501 |                     |                 | 0.00179             | 1               |
| A:C:B:DRB1 | 0101:0602:5701:0301 | 0.00366             | 2               |                     |                 |
| A:C:B:DRB1 | 0101:0602:5701:0701 | 0.01465             | 8               | 0.00358             | 2               |
| A:C:B:DRB1 | 0101:0602:5701:1104 | 0.00183             | 1               |                     |                 |
| A:C:B:DRB1 | 0101:0602:5701:1301 | 0.00183             | 1               |                     |                 |
| A:C:B:DRB1 | 0101:0602:5701:1501 | 0.00183             | 1               |                     |                 |

|            |                     |         |    |         |      |
|------------|---------------------|---------|----|---------|------|
| A:C:B:DRB1 | 0101:0701:0702:0411 |         |    | 0.00179 | 1    |
| A:C:B:DRB1 | 0101:0701:0801:0301 | 0.04938 | 27 | 0.02122 | 11.8 |
| A:C:B:DRB1 | 0101:0701:0801:1102 | 0.00183 | 1  |         |      |
| A:C:B:DRB1 | 0101:0701:0801:1302 |         |    | 0.00179 | 1    |
| A:C:B:DRB1 | 0101:0701:0801:1401 | 0.0019  | 1  |         |      |
| A:C:B:DRB1 | 0101:0701:0801:1501 | 0.00916 | 5  |         |      |
| A:C:B:DRB1 | 0101:0701:1501:0401 |         |    | 0.00358 | 2    |
| A:C:B:DRB1 | 0101:0701:1517:0301 | 0.0019  | 1  |         |      |
| A:C:B:DRB1 | 0101:0701:1517:0405 | 0.00183 | 1  |         |      |
| A:C:B:DRB1 | 0101:0701:1517:1401 | 0.00176 | 1  |         |      |
| A:C:B:DRB1 | 0101:0701:1801:0301 | 0.00183 | 1  |         |      |
| A:C:B:DRB1 | 0101:0701:1801:0408 |         |    | 0.00179 | 1    |
| A:C:B:DRB1 | 0101:0701:1801:1104 | 0.00183 | 1  |         |      |
| A:C:B:DRB1 | 0101:0701:2705:0404 |         |    | 0.00179 | 1    |
| A:C:B:DRB1 | 0101:0701:2705:1101 | 0.00183 | 1  |         |      |
| A:C:B:DRB1 | 0101:0701:4403:0404 | 0.00183 | 1  |         |      |
| A:C:B:DRB1 | 0101:0701:4403:0801 | 0.00183 | 1  |         |      |
| A:C:B:DRB1 | 0101:0701:4901:1101 | 0.00183 | 1  |         |      |
| A:C:B:DRB1 | 0101:0701:5501:1501 | 0.00183 | 1  |         |      |
| A:C:B:DRB1 | 0101:0701:5703:0405 |         |    | 0.00179 | 1    |
| A:C:B:DRB1 | 0101:0701:5801:0804 | 0.00183 | 1  |         |      |
| A:C:B:DRB1 | 0101:0702:0702:0101 | 0.00366 | 2  |         |      |
| A:C:B:DRB1 | 0101:0702:0702:1501 |         |    | 0.00289 | 1.6  |
| A:C:B:DRB1 | 0101:0704:4402:1404 | 0.00183 | 1  |         |      |
| A:C:B:DRB1 | 0101:0802:1402:0102 | 0.00183 | 1  |         |      |
| A:C:B:DRB1 | 0101:1202:5201:0301 | 0.00183 | 1  |         |      |
| A:C:B:DRB1 | 0101:1202:5201:1502 | 0.00183 | 1  |         |      |
| A:C:B:DRB1 | 0101:1203:3508:1402 |         |    | 0.00179 | 1    |
| A:C:B:DRB1 | 0101:1203:5101:1301 | 0.00183 | 1  |         |      |
| A:C:B:DRB1 | 0101:1502:3905:0701 |         |    | 0.00179 | 1    |
| A:C:B:DRB1 | 0101:1601:3801:0102 |         |    | 0.00179 | 1    |
| A:C:B:DRB1 | 0101:1601:4403:0701 |         |    | 0.00358 | 2    |

|            |                     |         |   |         |   |
|------------|---------------------|---------|---|---------|---|
| A:C:B:DRB1 | 0101:1604:4402:1501 | 0.00183 | 1 |         |   |
| A:C:B:DRB1 | 0101:1701:0702:1501 | 0.00183 | 1 |         |   |
| A:C:B:DRB1 | 0101:1701:5201:0302 |         |   | 0.00179 | 1 |
| A:C:B:DRB1 | 0102:1801:5703:0401 |         |   | 0.00179 | 1 |
| A:C:B:DRB1 | 0201:0102:1501:0401 | 0.00183 | 1 |         |   |
| A:C:B:DRB1 | 0201:0102:1515:0802 |         |   | 0.00358 | 2 |
| A:C:B:DRB1 | 0201:0102:1515:1406 |         |   | 0.00179 | 1 |
| A:C:B:DRB1 | 0201:0102:2705:0103 | 0.00183 | 1 |         |   |
| A:C:B:DRB1 | 0201:0102:3701:1001 | 0.00183 | 1 |         |   |
| A:C:B:DRB1 | 0201:0102:4004:1101 |         |   | 0.00179 | 1 |
| A:C:B:DRB1 | 0201:0102:5601:1501 | 0.00366 | 2 |         |   |
| A:C:B:DRB1 | 0201:0202:0702:0101 |         |   | 0.00179 | 1 |
| A:C:B:DRB1 | 0201:0202:2702:1001 | 0.00183 | 1 |         |   |
| A:C:B:DRB1 | 0201:0202:2705:0404 | 0.00366 | 2 |         |   |
| A:C:B:DRB1 | 0201:0202:4001:1101 |         |   | 0.00179 | 1 |
| A:C:B:DRB1 | 0201:0202:4002:0101 | 0.00183 | 1 |         |   |
| A:C:B:DRB1 | 0201:0202:4101:0301 | 0.00183 | 1 |         |   |
| A:C:B:DRB1 | 0201:0202:5101:1101 |         |   | 0.00179 | 1 |
| A:C:B:DRB1 | 0201:0210:1503:1602 |         |   | 0.00358 | 2 |
| A:C:B:DRB1 | 0201:0210:5201:1404 |         |   | 0.00179 | 1 |
| A:C:B:DRB1 | 0201:0302:4001:1001 |         |   | 0.00179 | 1 |
| A:C:B:DRB1 | 0201:0303:0702:1401 | 0.00183 | 1 |         |   |
| A:C:B:DRB1 | 0201:0303:1501:0101 |         |   | 0.00179 | 1 |
| A:C:B:DRB1 | 0201:0303:1501:0401 | 0.00183 | 1 | 0.00179 | 1 |
| A:C:B:DRB1 | 0201:0303:1501:1104 | 0.00549 | 3 |         |   |
| A:C:B:DRB1 | 0201:0303:4403:0402 | 0.00183 | 1 |         |   |
| A:C:B:DRB1 | 0201:0303:5201:0407 |         |   | 0.00358 | 2 |
| A:C:B:DRB1 | 0201:0303:5201:0802 |         |   | 0.00179 | 1 |
| A:C:B:DRB1 | 0201:0303:5701:1501 | 0.00183 | 1 |         |   |
| A:C:B:DRB1 | 0201:0304:1302:0801 | 0.00183 | 1 |         |   |
| A:C:B:DRB1 | 0201:0304:1501:0101 | 0.00366 | 2 |         |   |
| A:C:B:DRB1 | 0201:0304:1501:0401 | 0.00916 | 5 | 0.00179 | 1 |

|            |                     |         |   |         |   |
|------------|---------------------|---------|---|---------|---|
| A:C:B:DRB1 | 0201:0304:1501:0403 |         |   | 0.00179 | 1 |
| A:C:B:DRB1 | 0201:0304:1501:1101 | 0.00183 | 1 |         |   |
| A:C:B:DRB1 | 0201:0304:1501:1103 | 0.00183 | 1 |         |   |
| A:C:B:DRB1 | 0201:0304:4001:0301 | 0.00183 | 1 |         |   |
| A:C:B:DRB1 | 0201:0304:4001:0404 | 0.01099 | 6 |         |   |
| A:C:B:DRB1 | 0201:0304:4001:0804 | 0.00183 | 1 |         |   |
| A:C:B:DRB1 | 0201:0304:4001:1302 |         |   | 0.00179 | 1 |
| A:C:B:DRB1 | 0201:0304:4001:1304 | 0.00183 | 1 |         |   |
| A:C:B:DRB1 | 0201:0304:4001:1401 | 0.00366 | 2 |         |   |
| A:C:B:DRB1 | 0201:0304:4002:0407 |         |   | 0.00179 | 1 |
| A:C:B:DRB1 | 0201:0304:4002:1406 |         |   | 0.00179 | 1 |
| A:C:B:DRB1 | 0201:0305:3531:0407 |         |   | 0.00179 | 1 |
| A:C:B:DRB1 | 0201:0305:5101:0404 |         |   | 0.00179 | 1 |
| A:C:B:DRB1 | 0201:0306:5802:1201 |         |   | 0.00179 | 1 |
| A:C:B:DRB1 | 0201:0401:1501:1301 | 0.00183 | 1 |         |   |
| A:C:B:DRB1 | 0201:0401:3501:0101 | 0.00183 | 1 |         |   |
| A:C:B:DRB1 | 0201:0401:3501:0803 |         |   | 0.00179 | 1 |
| A:C:B:DRB1 | 0201:0401:3501:1101 |         |   | 0.00179 | 1 |
| A:C:B:DRB1 | 0201:0401:3501:1401 | 0.00183 | 1 |         |   |
| A:C:B:DRB1 | 0201:0401:3501:1501 | 0.00183 | 1 |         |   |
| A:C:B:DRB1 | 0201:0401:3502:0404 | 0.00183 | 1 |         |   |
| A:C:B:DRB1 | 0201:0401:3502:0407 |         |   | 0.00179 | 1 |
| A:C:B:DRB1 | 0201:0401:3503:0101 | 0.00183 | 1 |         |   |
| A:C:B:DRB1 | 0201:0401:3503:0701 | 0.00183 | 1 |         |   |
| A:C:B:DRB1 | 0201:0401:3503:1301 | 0.00183 | 1 |         |   |
| A:C:B:DRB1 | 0201:0401:3503:1302 | 0.00183 | 1 |         |   |
| A:C:B:DRB1 | 0201:0401:3503:1501 | 0.00366 | 2 |         |   |
| A:C:B:DRB1 | 0201:0401:3508:0402 | 0.00366 | 2 |         |   |
| A:C:B:DRB1 | 0201:0401:3512:0802 |         |   | 0.00179 | 1 |
| A:C:B:DRB1 | 0201:0401:3517:0404 | 0.00183 | 1 |         |   |
| A:C:B:DRB1 | 0201:0401:3517:0802 |         |   | 0.00358 | 2 |
| A:C:B:DRB1 | 0201:0401:3517:1406 |         |   | 0.00179 | 1 |

|            |                     |         |     |         |   |
|------------|---------------------|---------|-----|---------|---|
| A:C:B:DRB1 | 0201:0401:3801:0403 |         |     | 0.00179 | 1 |
| A:C:B:DRB1 | 0201:0401:4501:0404 |         |     | 0.00179 | 1 |
| A:C:B:DRB1 | 0201:0401:5101:0101 | 0.00183 | 1   |         |   |
| A:C:B:DRB1 | 0201:0401:5105:1104 | 0.00183 | 1   |         |   |
| A:C:B:DRB1 | 0201:0401:5301:1101 | 0.00183 | 1   |         |   |
| A:C:B:DRB1 | 0201:0401:5501:1402 |         |     | 0.00179 | 1 |
| A:C:B:DRB1 | 0201:0501:1801:0301 | 0.00733 | 4   | 0.00717 | 4 |
| A:C:B:DRB1 | 0201:0501:2705:0801 | 0.00183 | 1   |         |   |
| A:C:B:DRB1 | 0201:0501:4402:0101 | 0.00366 | 2   |         |   |
| A:C:B:DRB1 | 0201:0501:4402:0103 | 0.00183 | 1   |         |   |
| A:C:B:DRB1 | 0201:0501:4402:0301 |         |     | 0.00358 | 2 |
| A:C:B:DRB1 | 0201:0501:4402:0401 | 0.01832 | 10  | 0.00538 | 3 |
| A:C:B:DRB1 | 0201:0501:4402:0404 |         |     | 0.00179 | 1 |
| A:C:B:DRB1 | 0201:0501:4402:0701 | 0.00183 | 1   |         |   |
| A:C:B:DRB1 | 0201:0501:4402:1101 | 0.00183 | 1   | 0.00179 | 1 |
| A:C:B:DRB1 | 0201:0501:4402:1201 | 0.00366 | 2   |         |   |
| A:C:B:DRB1 | 0201:0501:4402:1301 | 0.00733 | 4   | 0.00358 | 2 |
| A:C:B:DRB1 | 0201:0501:4402:1305 | 0.00183 | 1   |         |   |
| A:C:B:DRB1 | 0201:0501:4402:1306 |         |     | 0.00179 | 1 |
| A:C:B:DRB1 | 0201:0501:4402:1602 |         |     | 0.00179 | 1 |
| A:C:B:DRB1 | 0201:0501:5101:0401 | 0.00183 | 1   |         |   |
| A:C:B:DRB1 | 0201:0602:0702:1201 |         |     | 0.00179 | 1 |
| A:C:B:DRB1 | 0201:0602:1302:0701 | 0.00214 | 1.2 | 0.00538 | 3 |
| A:C:B:DRB1 | 0201:0602:1540:0701 |         |     | 0.00179 | 1 |
| A:C:B:DRB1 | 0201:0602:3701:0701 | 0.00183 | 1   |         |   |
| A:C:B:DRB1 | 0201:0602:3906:0101 |         |     | 0.00179 | 1 |
| A:C:B:DRB1 | 0201:0602:4501:0901 |         |     | 0.00358 | 2 |
| A:C:B:DRB1 | 0201:0602:4501:1102 | 0.00183 | 1   |         |   |
| A:C:B:DRB1 | 0201:0602:5001:0301 | 0.00549 | 3   |         |   |
| A:C:B:DRB1 | 0201:0602:5001:0404 |         |     | 0.00179 | 1 |
| A:C:B:DRB1 | 0201:0602:5002:0406 |         |     | 0.00179 | 1 |
| A:C:B:DRB1 | 0201:0602:5701:0701 | 0.00733 | 4   | 0.00179 | 1 |

|            |                     |         |      |         |   |
|------------|---------------------|---------|------|---------|---|
| A:C:B:DRB1 | 0201:0602:5802:0701 |         |      | 0.00179 | 1 |
| A:C:B:DRB1 | 0201:0701:0801:0301 | 0.00733 | 4    | 0.00896 | 5 |
| A:C:B:DRB1 | 0201:0701:0801:0401 |         |      | 0.00179 | 1 |
| A:C:B:DRB1 | 0201:0701:0801:0801 | 0.00366 | 2    |         |   |
| A:C:B:DRB1 | 0201:0701:1501:0701 | 0.00366 | 2    |         |   |
| A:C:B:DRB1 | 0201:0701:1517:0701 |         |      | 0.00179 | 1 |
| A:C:B:DRB1 | 0201:0701:1801:0403 |         |      | 0.00179 | 1 |
| A:C:B:DRB1 | 0201:0701:1801:1104 |         |      | 0.00358 | 2 |
| A:C:B:DRB1 | 0201:0701:3924:0701 |         |      | 0.00179 | 1 |
| A:C:B:DRB1 | 0201:0701:4001:1102 |         |      | 0.00179 | 1 |
| A:C:B:DRB1 | 0201:0701:4901:0102 | 0.00183 | 1    |         |   |
| A:C:B:DRB1 | 0201:0701:5101:1602 |         |      | 0.00179 | 1 |
| A:C:B:DRB1 | 0201:0701:5105:1104 | 0.00183 | 1    |         |   |
| A:C:B:DRB1 | 0201:0701:5801:1301 | 0.00183 | 1    |         |   |
| A:C:B:DRB1 | 0201:0702:0702:1401 |         |      | 0.00179 | 1 |
| A:C:B:DRB1 | 0201:0702:0702:1501 | 0.02768 | 15.1 | 0.01434 | 8 |
| A:C:B:DRB1 | 0201:0702:3577:0801 | 0.00183 | 1    |         |   |
| A:C:B:DRB1 | 0201:0702:3701:1104 |         |      | 0.00179 | 1 |
| A:C:B:DRB1 | 0201:0702:3902:1104 |         |      | 0.00179 | 1 |
| A:C:B:DRB1 | 0201:0702:3906:0403 |         |      | 0.00179 | 1 |
| A:C:B:DRB1 | 0201:0702:3906:1406 |         |      | 0.00179 | 1 |
| A:C:B:DRB1 | 0201:0702:3908:0407 |         |      | 0.00179 | 1 |
| A:C:B:DRB1 | 0201:0702:5101:0701 |         |      | 0.00179 | 1 |
| A:C:B:DRB1 | 0201:0702:5701:0301 |         |      | 0.00179 | 1 |
| A:C:B:DRB1 | 0201:0704:1501:0404 |         |      | 0.00179 | 1 |
| A:C:B:DRB1 | 0201:0704:4402:1101 | 0.00549 | 3    |         |   |
| A:C:B:DRB1 | 0201:0704:4402:1104 |         |      | 0.00179 | 1 |
| A:C:B:DRB1 | 0201:0704:4402:1601 |         |      | 0.00179 | 1 |
| A:C:B:DRB1 | 0201:0801:5102:0403 |         |      | 0.00358 | 2 |
| A:C:B:DRB1 | 0201:0802:1401:0701 | 0.00366 | 2    |         |   |
| A:C:B:DRB1 | 0201:0802:1402:0102 | 0.00183 | 1    | 0.00538 | 3 |
| A:C:B:DRB1 | 0201:0802:1402:1501 | 0.00183 | 1    |         |   |

|            |                     |         |     |         |   |
|------------|---------------------|---------|-----|---------|---|
| A:C:B:DRB1 | 0201:0802:3503:0701 | 0.00183 | 1   |         |   |
| A:C:B:DRB1 | 0201:1202:5201:1502 | 0.00183 | 1   | 0.00179 | 1 |
| A:C:B:DRB1 | 0201:1203:3801:0101 |         |     | 0.00179 | 1 |
| A:C:B:DRB1 | 0201:1203:3801:1104 | 0.00183 | 1   |         |   |
| A:C:B:DRB1 | 0201:1203:3801:1301 | 0.00235 | 1.3 |         |   |
| A:C:B:DRB1 | 0201:1203:3801:1501 |         |     | 0.00358 | 2 |
| A:C:B:DRB1 | 0201:1203:4501:1401 |         |     | 0.00179 | 1 |
| A:C:B:DRB1 | 0201:1203:5101:1601 | 0.00183 | 1   |         |   |
| A:C:B:DRB1 | 0201:1203:5801:1601 |         |     | 0.00179 | 1 |
| A:C:B:DRB1 | 0201:1212:1804:0302 |         |     | 0.00179 | 1 |
| A:C:B:DRB1 | 0201:1402:1516:0302 |         |     | 0.00179 | 1 |
| A:C:B:DRB1 | 0201:1402:3512:1302 |         |     | 0.00179 | 1 |
| A:C:B:DRB1 | 0201:1402:5101:0701 | 0.00183 | 1   |         |   |
| A:C:B:DRB1 | 0201:1402:5101:1301 |         |     | 0.00358 | 2 |
| A:C:B:DRB1 | 0201:1502:1501:0101 |         |     | 0.00179 | 1 |
| A:C:B:DRB1 | 0201:1502:4403:0402 |         |     | 0.00179 | 1 |
| A:C:B:DRB1 | 0201:1502:5101:0701 |         |     | 0.00179 | 1 |
| A:C:B:DRB1 | 0201:1502:5101:1101 |         |     | 0.00179 | 1 |
| A:C:B:DRB1 | 0201:1502:5101:1301 | 0.00183 | 1   |         |   |
| A:C:B:DRB1 | 0201:1505:0705:0701 |         |     | 0.00179 | 1 |
| A:C:B:DRB1 | 0201:1505:5101:1101 | 0.00366 | 2   |         |   |
| A:C:B:DRB1 | 0201:1509:3517:0404 |         |     | 0.00179 | 1 |
| A:C:B:DRB1 | 0201:1601:4403:0701 | 0.00263 | 1.4 | 0.00358 | 2 |
| A:C:B:DRB1 | 0201:1601:4501:0701 |         |     | 0.00179 | 1 |
| A:C:B:DRB1 | 0201:1602:0702:0301 | 0.00183 | 1   |         |   |
| A:C:B:DRB1 | 0201:1602:4403:1104 | 0.00183 | 1   |         |   |
| A:C:B:DRB1 | 0201:1602:5101:0701 |         |     | 0.00179 | 1 |
| A:C:B:DRB1 | 0201:1602:5501:0404 | 0.00183 | 1   |         |   |
| A:C:B:DRB1 | 0201:1701:3501:1104 | 0.00183 | 1   |         |   |
| A:C:B:DRB1 | 0201:1701:4101:0701 |         |     | 0.00179 | 1 |
| A:C:B:DRB1 | 0202:0401:3501:1314 |         |     | 0.00179 | 1 |
| A:C:B:DRB1 | 0202:1203:3901:0405 | 0.00183 | 1   |         |   |

|            |                     |         |   |         |   |
|------------|---------------------|---------|---|---------|---|
| A:C:B:DRB1 | 0202:1601:4430:0103 |         |   | 0.00179 | 1 |
| A:C:B:DRB1 | 0204:0304:4002:0411 |         |   | 0.00179 | 1 |
| A:C:B:DRB1 | 0204:0602:5701:0101 |         |   | 0.00179 | 1 |
| A:C:B:DRB1 | 0204:1502:5101:0411 |         |   | 0.00179 | 1 |
| A:C:B:DRB1 | 0204:1602:3905:0411 |         |   | 0.00179 | 1 |
| A:C:B:DRB1 | 0205:0102:2705:0701 | 0.00183 | 1 |         |   |
| A:C:B:DRB1 | 0205:0210:5001:1302 | 0.00183 | 1 |         |   |
| A:C:B:DRB1 | 0205:0304:4901:0901 |         |   | 0.00179 | 1 |
| A:C:B:DRB1 | 0205:0304:5501:0411 |         |   | 0.00179 | 1 |
| A:C:B:DRB1 | 0205:0401:0705:0301 | 0.00183 | 1 |         |   |
| A:C:B:DRB1 | 0205:0401:3502:0701 | 0.00183 | 1 |         |   |
| A:C:B:DRB1 | 0205:0602:1302:0701 |         |   | 0.00179 | 1 |
| A:C:B:DRB1 | 0205:0602:4402:1101 |         |   | 0.00179 | 1 |
| A:C:B:DRB1 | 0205:0602:5001:0701 | 0.00366 | 2 |         |   |
| A:C:B:DRB1 | 0205:0701:4101:0101 |         |   | 0.00179 | 1 |
| A:C:B:DRB1 | 0205:0701:4101:1305 |         |   | 0.00179 | 1 |
| A:C:B:DRB1 | 0205:0701:4901:0101 |         |   | 0.0018  | 1 |
| A:C:B:DRB1 | 0205:0701:5801:0405 | 0.00183 | 1 |         |   |
| A:C:B:DRB1 | 0205:0701:5801:0803 | 0.00183 | 1 |         |   |
| A:C:B:DRB1 | 0205:0701:5801:1301 |         |   | 0.00358 | 2 |
| A:C:B:DRB1 | 0205:0704:4402:1101 | 0.00183 | 1 |         |   |
| A:C:B:DRB1 | 0205:1203:3801:0701 |         |   | 0.00179 | 1 |
| A:C:B:DRB1 | 0205:1509:5101:0802 |         |   | 0.00179 | 1 |
| A:C:B:DRB1 | 0205:1801:8101:1302 |         |   | 0.00179 | 1 |
| A:C:B:DRB1 | 0206:0102:1501:0410 |         |   | 0.00179 | 1 |
| A:C:B:DRB1 | 0206:0102:1515:0802 |         |   | 0.00179 | 1 |
| A:C:B:DRB1 | 0206:0102:3543:0802 |         |   | 0.00179 | 1 |
| A:C:B:DRB1 | 0206:0102:3902:0404 |         |   | 0.00179 | 1 |
| A:C:B:DRB1 | 0206:0202:3905:0404 |         |   | 0.00179 | 1 |
| A:C:B:DRB1 | 0206:0202:4403:0102 |         |   | 0.00179 | 1 |
| A:C:B:DRB1 | 0206:0304:3517:0411 |         |   | 0.00179 | 1 |
| A:C:B:DRB1 | 0206:0304:4801:0404 |         |   | 0.00179 | 1 |



|            |                     |         |   |         |   |
|------------|---------------------|---------|---|---------|---|
| A:C:B:DRB1 | 0206:0401:3501:0407 |         |   | 0.00179 | 1 |
| A:C:B:DRB1 | 0206:0401:3512:1302 |         |   | 0.00179 | 1 |
| A:C:B:DRB1 | 0206:0401:3517:0802 |         |   | 0.00358 | 2 |
| A:C:B:DRB1 | 0206:0701:0801:0802 |         |   | 0.00179 | 1 |
| A:C:B:DRB1 | 0206:0701:4002:1406 |         |   | 0.00179 | 1 |
| A:C:B:DRB1 | 0206:0702:3905:0407 |         |   | 0.00179 | 1 |
| A:C:B:DRB1 | 0206:0702:3908:0407 |         |   | 0.00538 | 3 |
| A:C:B:DRB1 | 0206:0801:4801:0802 |         |   | 0.00179 | 1 |
| A:C:B:DRB1 | 0206:1502:5101:0802 |         |   | 0.00179 | 1 |
| A:C:B:DRB1 | 0206:1502:5101:1602 | 0.00183 | 1 |         |   |
| A:C:B:DRB1 | 0206:1701:4101:0802 |         |   | 0.00179 | 1 |
| A:C:B:DRB1 | 0211:0202:3905:0901 |         |   | 0.00179 | 1 |
| A:C:B:DRB1 | 0211:0304:3501:0407 |         |   | 0.00179 | 1 |
| A:C:B:DRB1 | 0211:0701:4901:0102 |         |   | 0.00179 | 1 |
| A:C:B:DRB1 | 0211:1502:4403:0411 |         |   | 0.00179 | 1 |
| A:C:B:DRB1 | 0213:1502:5101:0404 |         |   | 0.00179 | 1 |
| A:C:B:DRB1 | 0217:0303:5001:0802 |         |   | 0.00179 | 1 |
| A:C:B:DRB1 | 0217:0305:4002:0411 |         |   | 0.00358 | 2 |
| A:C:B:DRB1 | 0217:1601:3505:1301 |         |   | 0.00179 | 1 |
| A:C:B:DRB1 | 0222:0401:4004:0407 |         |   | 0.00179 | 1 |
| A:C:B:DRB1 | 0244:0306:4002:0802 | 0.00183 | 1 |         |   |
| A:C:B:DRB1 | 0301:0102:1401:1503 |         |   | 0.00179 | 1 |
| A:C:B:DRB1 | 0301:0102:1501:1501 | 0.00183 | 1 |         |   |
| A:C:B:DRB1 | 0301:0102:3701:0701 | 0.00183 | 1 |         |   |
| A:C:B:DRB1 | 0301:0102:5101:0401 |         |   | 0.00179 | 1 |
| A:C:B:DRB1 | 0301:0102:5601:0401 |         |   | 0.00179 | 1 |
| A:C:B:DRB1 | 0301:0202:2702:0901 |         |   | 0.00179 | 1 |
| A:C:B:DRB1 | 0301:0202:2705:0102 |         |   | 0.00179 | 1 |
| A:C:B:DRB1 | 0301:0202:5101:0101 | 0.00183 | 1 |         |   |
| A:C:B:DRB1 | 0301:0210:1503:1304 |         |   | 0.00179 | 1 |
| A:C:B:DRB1 | 0301:0210:4701:1301 |         |   | 0.00179 | 1 |
| A:C:B:DRB1 | 0301:0302:5801:0301 |         |   | 0.00179 | 1 |

|            |                     |         |   |         |     |
|------------|---------------------|---------|---|---------|-----|
| A:C:B:DRB1 | 0301:0303:1501:1301 |         |   | 0.00358 | 2   |
| A:C:B:DRB1 | 0301:0303:5501:1401 | 0.00183 | 1 |         |     |
| A:C:B:DRB1 | 0301:0304:1501:0401 | 0.00183 | 1 |         |     |
| A:C:B:DRB1 | 0301:0304:3508:0404 | 0.00183 | 1 |         |     |
| A:C:B:DRB1 | 0301:0304:4001:0301 | 0.00183 | 1 |         |     |
| A:C:B:DRB1 | 0301:0304:4001:1301 | 0.00366 | 2 |         |     |
| A:C:B:DRB1 | 0301:0401:0702:0701 | 0.00366 | 2 |         |     |
| A:C:B:DRB1 | 0301:0401:1801:0407 | 0.00183 | 1 |         |     |
| A:C:B:DRB1 | 0301:0401:3501:0101 |         |   | 0.00799 | 4.5 |
| A:C:B:DRB1 | 0301:0401:3501:1001 | 0.00183 | 1 |         |     |
| A:C:B:DRB1 | 0301:0401:3501:1102 | 0.00183 | 1 |         |     |
| A:C:B:DRB1 | 0301:0401:3502:1104 | 0.00183 | 1 |         |     |
| A:C:B:DRB1 | 0301:0401:3503:0901 |         |   | 0.00179 | 1   |
| A:C:B:DRB1 | 0301:0401:3503:1501 |         |   | 0.00179 | 1   |
| A:C:B:DRB1 | 0301:0401:4001:1101 | 0.00183 | 1 |         |     |
| A:C:B:DRB1 | 0301:0401:4101:1601 | 0.00183 | 1 |         |     |
| A:C:B:DRB1 | 0301:0401:4901:0101 | 0.00183 | 1 |         |     |
| A:C:B:DRB1 | 0301:0401:4901:1101 | 0.00183 | 1 |         |     |
| A:C:B:DRB1 | 0301:0401:5101:1503 |         |   | 0.00179 | 1   |
| A:C:B:DRB1 | 0301:0401:5702:0701 |         |   | 0.00179 | 1   |
| A:C:B:DRB1 | 0301:0501:0705:0405 | 0.00183 | 1 |         |     |
| A:C:B:DRB1 | 0301:0602:1302:0901 | 0.00183 | 1 |         |     |
| A:C:B:DRB1 | 0301:0602:3701:0404 | 0.00183 | 1 |         |     |
| A:C:B:DRB1 | 0301:0602:4501:1601 | 0.00183 | 1 |         |     |
| A:C:B:DRB1 | 0301:0602:5001:0701 |         |   | 0.00358 | 2   |
| A:C:B:DRB1 | 0301:0602:5001:0801 | 0.00183 | 1 |         |     |
| A:C:B:DRB1 | 0301:0602:5001:1601 | 0.00183 | 1 |         |     |
| A:C:B:DRB1 | 0301:0602:5301:1001 |         |   | 0.00179 | 1   |
| A:C:B:DRB1 | 0301:0701:0801:1501 | 0.00183 | 1 |         |     |
| A:C:B:DRB1 | 0301:0701:1517:0101 |         |   | 0.00179 | 1   |
| A:C:B:DRB1 | 0301:0701:1801:1302 | 0.00183 | 1 |         |     |
| A:C:B:DRB1 | 0301:0701:4901:1101 |         |   | 0.00179 | 1   |

|            |                     |         |      |         |     |
|------------|---------------------|---------|------|---------|-----|
| A:C:B:DRB1 | 0301:0702:0702:0101 | 0.00366 | 2    |         |     |
| A:C:B:DRB1 | 0301:0702:0702:0401 |         |      | 0.00179 | 1   |
| A:C:B:DRB1 | 0301:0702:0702:0408 | 0.00183 | 1    |         |     |
| A:C:B:DRB1 | 0301:0702:0702:0801 | 0.00366 | 2    |         |     |
| A:C:B:DRB1 | 0301:0702:0702:1101 | 0.00366 | 2    |         |     |
| A:C:B:DRB1 | 0301:0702:0702:1302 | 0.00183 | 1    |         |     |
| A:C:B:DRB1 | 0301:0702:0702:1401 | 0.00183 | 1    | 0.00179 | 1   |
| A:C:B:DRB1 | 0301:0702:0702:1501 | 0.0233  | 12.7 | 0.00993 | 5.5 |
| A:C:B:DRB1 | 0301:0702:3503:0403 |         |      | 0.00179 | 1   |
| A:C:B:DRB1 | 0301:0702:4403:0701 | 0.00183 | 1    |         |     |
| A:C:B:DRB1 | 0301:0704:1501:1104 | 0.00183 | 1    |         |     |
| A:C:B:DRB1 | 0301:0802:1401:1301 |         |      | 0.00179 | 1   |
| A:C:B:DRB1 | 0301:0802:1402:0701 |         |      | 0.00179 | 1   |
| A:C:B:DRB1 | 0301:0802:1402:1201 |         |      | 0.00179 | 1   |
| A:C:B:DRB1 | 0301:0802:1402:1302 | 0.00183 | 1    |         |     |
| A:C:B:DRB1 | 0301:0802:1402:1501 |         |      | 0.00179 | 1   |
| A:C:B:DRB1 | 0301:1202:5701:1502 |         |      | 0.00179 | 1   |
| A:C:B:DRB1 | 0301:1203:0702:1001 | 0.00183 | 1    |         |     |
| A:C:B:DRB1 | 0301:1203:1801:0404 |         |      | 0.00179 | 1   |
| A:C:B:DRB1 | 0301:1203:1801:1407 |         |      | 0.00179 | 1   |
| A:C:B:DRB1 | 0301:1203:3503:1502 |         |      | 0.00179 | 1   |
| A:C:B:DRB1 | 0301:1203:3801:1101 | 0.00366 | 2    |         |     |
| A:C:B:DRB1 | 0301:1203:3801:1301 | 0.00497 | 2.7  |         |     |
| A:C:B:DRB1 | 0301:1203:3920:0804 |         |      | 0.00179 | 1   |
| A:C:B:DRB1 | 0301:1203:4701:0405 | 0.00183 | 1    |         |     |
| A:C:B:DRB1 | 0301:1203:4801:0404 |         |      | 0.00179 | 1   |
| A:C:B:DRB1 | 0301:1205:1801:1101 |         |      | 0.00179 | 1   |
| A:C:B:DRB1 | 0301:1402:1516:0701 |         |      | 0.00179 | 1   |
| A:C:B:DRB1 | 0301:1402:5101:0101 | 0.00183 | 1    |         |     |
| A:C:B:DRB1 | 0301:1601:4403:0701 | 0.00286 | 1.6  |         |     |
| A:C:B:DRB1 | 0301:1601:4404:1101 | 0.00183 | 1    |         |     |
| A:C:B:DRB1 | 0301:1601:5101:1104 |         |      | 0.00179 | 1   |

|            |                     |         |     |         |   |
|------------|---------------------|---------|-----|---------|---|
| A:C:B:DRB1 | 0301:1601:7801:1001 |         |     | 0.00179 | 1 |
| A:C:B:DRB1 | 0301:1602:4403:0402 |         |     | 0.00179 | 1 |
| A:C:B:DRB1 | 0301:1801:5703:1503 |         |     | 0.00179 | 1 |
| A:C:B:DRB1 | 0302:0702:0801:0301 |         |     | 0.00179 | 1 |
| A:C:B:DRB1 | 1101:0102:1501:1001 |         |     | 0.00179 | 1 |
| A:C:B:DRB1 | 1101:0102:2705:0101 | 0.00549 | 3   | 0.00358 | 2 |
| A:C:B:DRB1 | 1101:0102:2705:1101 | 0.00183 | 1   |         |   |
| A:C:B:DRB1 | 1101:0102:5601:0101 | 0.00366 | 2   |         |   |
| A:C:B:DRB1 | 1101:0202:0801:1401 |         |     | 0.00179 | 1 |
| A:C:B:DRB1 | 1101:0202:3901:0102 |         |     | 0.00179 | 1 |
| A:C:B:DRB1 | 1101:0303:5501:0404 | 0.00183 | 1   |         |   |
| A:C:B:DRB1 | 1101:0304:3501:0404 |         |     | 0.00179 | 1 |
| A:C:B:DRB1 | 1101:0304:4001:0404 |         |     | 0.00538 | 3 |
| A:C:B:DRB1 | 1101:0304:4001:1201 | 0.00183 | 1   |         |   |
| A:C:B:DRB1 | 1101:0401:0702:0401 |         |     | 0.00179 | 1 |
| A:C:B:DRB1 | 1101:0401:3501:0101 | 0.01099 | 6   | 0.00896 | 5 |
| A:C:B:DRB1 | 1101:0401:3501:0407 |         |     | 0.00179 | 1 |
| A:C:B:DRB1 | 1101:0401:3501:0901 |         |     | 0.00179 | 1 |
| A:C:B:DRB1 | 1101:0401:4403:1101 | 0.00183 | 1   |         |   |
| A:C:B:DRB1 | 1101:0401:4403:1401 | 0.00183 | 1   |         |   |
| A:C:B:DRB1 | 1101:0501:5101:0301 | 0.00183 | 1   |         |   |
| A:C:B:DRB1 | 1101:0602:1302:0701 | 0.00152 | 0.8 |         |   |
| A:C:B:DRB1 | 1101:0602:3701:1301 |         |     | 0.00179 | 1 |
| A:C:B:DRB1 | 1101:0602:5001:0102 | 0.00183 | 1   |         |   |
| A:C:B:DRB1 | 1101:0701:0801:0301 | 0.00366 | 2   |         |   |
| A:C:B:DRB1 | 1101:0701:0801:0404 | 0.00183 | 1   |         |   |
| A:C:B:DRB1 | 1101:0701:4901:0102 |         |     | 0.00358 | 2 |
| A:C:B:DRB1 | 1101:0701:4901:1001 | 0.00183 | 1   |         |   |
| A:C:B:DRB1 | 1101:0701:5201:0701 |         |     | 0.00179 | 1 |
| A:C:B:DRB1 | 1101:0701:5501:0403 | 0.00183 | 1   |         |   |
| A:C:B:DRB1 | 1101:0702:0702:0103 |         |     | 0.00179 | 1 |
| A:C:B:DRB1 | 1101:0702:0702:1501 | 0.00397 | 2.2 |         |   |

|            |                     |         |   |         |   |
|------------|---------------------|---------|---|---------|---|
| A:C:B:DRB1 | 1101:0702:2705:0101 |         |   | 0.00179 | 1 |
| A:C:B:DRB1 | 1101:0702:3501:1401 | 0.00183 | 1 |         |   |
| A:C:B:DRB1 | 1101:0702:3905:1501 |         |   | 0.00179 | 1 |
| A:C:B:DRB1 | 1101:0702:4403:0701 | 0.00183 | 1 |         |   |
| A:C:B:DRB1 | 1101:0704:1518:1301 |         |   | 0.00179 | 1 |
| A:C:B:DRB1 | 1101:0802:3501:0701 |         |   | 0.00179 | 1 |
| A:C:B:DRB1 | 1101:1202:1503:0407 |         |   | 0.00179 | 1 |
| A:C:B:DRB1 | 1101:1202:5201:0402 | 0.00183 | 1 |         |   |
| A:C:B:DRB1 | 1101:1202:5201:1302 | 0.00183 | 1 |         |   |
| A:C:B:DRB1 | 1101:1202:5201:1502 | 0.00183 | 1 |         |   |
| A:C:B:DRB1 | 1101:1203:1801:1101 |         |   | 0.00179 | 1 |
| A:C:B:DRB1 | 1101:1203:3503:0701 | 0.00183 | 1 |         |   |
| A:C:B:DRB1 | 1101:1402:5101:0701 | 0.00183 | 1 |         |   |
| A:C:B:DRB1 | 1101:1502:1302:0701 |         |   | 0.00179 | 1 |
| A:C:B:DRB1 | 1101:1502:5101:1301 |         |   | 0.00179 | 1 |
| A:C:B:DRB1 | 1101:1601:3501:1404 |         |   | 0.00179 | 1 |
| A:C:B:DRB1 | 1105:0102:5401:1405 |         |   | 0.00179 | 1 |
| A:C:B:DRB1 | 2301:0202:0702:0302 |         |   | 0.00179 | 1 |
| A:C:B:DRB1 | 2301:0202:4403:0102 | 0.00183 | 1 |         |   |
| A:C:B:DRB1 | 2301:0210:1503:1301 |         |   | 0.00179 | 1 |
| A:C:B:DRB1 | 2301:0210:1801:1101 |         |   | 0.00179 | 1 |
| A:C:B:DRB1 | 2301:0302:5801:0701 |         |   | 0.00179 | 1 |
| A:C:B:DRB1 | 2301:0303:5501:1501 | 0.00366 | 2 |         |   |
| A:C:B:DRB1 | 2301:0304:4001:0404 | 0.00366 | 2 |         |   |
| A:C:B:DRB1 | 2301:0401:0705:1001 |         |   | 0.00179 | 1 |
| A:C:B:DRB1 | 2301:0401:3501:0302 |         |   | 0.00179 | 1 |
| A:C:B:DRB1 | 2301:0401:3502:1401 | 0.00183 | 1 |         |   |
| A:C:B:DRB1 | 2301:0401:4403:0701 | 0.00366 | 2 | 0.00358 | 2 |
| A:C:B:DRB1 | 2301:0401:4403:1103 | 0.00183 | 1 |         |   |
| A:C:B:DRB1 | 2301:0401:4901:1502 |         |   | 0.00179 | 1 |
| A:C:B:DRB1 | 2301:0401:5501:1401 |         |   | 0.00179 | 1 |
| A:C:B:DRB1 | 2301:0401:5501:1501 |         |   | 0.00179 | 1 |

|            |                     |         |   |         |     |
|------------|---------------------|---------|---|---------|-----|
| A:C:B:DRB1 | 2301:0501:4403:1101 |         |   | 0.00179 | 1   |
| A:C:B:DRB1 | 2301:0602:4501:1602 |         |   | 0.00179 | 1   |
| A:C:B:DRB1 | 2301:0602:5001:0301 | 0.00183 | 1 | 0.00358 | 2   |
| A:C:B:DRB1 | 2301:0701:0801:0301 |         |   | 0.00208 | 1.2 |
| A:C:B:DRB1 | 2301:0701:4101:1602 |         |   | 0.00179 | 1   |
| A:C:B:DRB1 | 2301:0701:4901:1101 | 0.00549 | 3 |         |     |
| A:C:B:DRB1 | 2301:0702:0702:1501 |         |   | 0.00151 | 0.8 |
| A:C:B:DRB1 | 2301:0702:0702:1602 |         |   | 0.00179 | 1   |
| A:C:B:DRB1 | 2301:0702:2703:1302 |         |   | 0.00179 | 1   |
| A:C:B:DRB1 | 2301:0702:3906:0802 |         |   | 0.00179 | 1   |
| A:C:B:DRB1 | 2301:0802:1402:0102 | 0.00366 | 2 |         |     |
| A:C:B:DRB1 | 2301:0802:1402:1501 | 0.00183 | 1 |         |     |
| A:C:B:DRB1 | 2301:0802:4403:0405 |         |   | 0.00179 | 1   |
| A:C:B:DRB1 | 2301:1203:3901:1101 |         |   | 0.00179 | 1   |
| A:C:B:DRB1 | 2301:1406:1515:0411 |         |   | 0.00179 | 1   |
| A:C:B:DRB1 | 2301:1601:4403:0701 |         |   | 0.00179 | 1   |
| A:C:B:DRB1 | 2301:1602:5101:1302 | 0.00183 | 1 |         |     |
| A:C:B:DRB1 | 2305:0702:0702:1503 |         |   | 0.00179 | 1   |
| A:C:B:DRB1 | 2402:0102:1501:0802 |         |   | 0.00179 | 1   |
| A:C:B:DRB1 | 2402:0102:2705:0404 |         |   | 0.00358 | 2   |
| A:C:B:DRB1 | 2402:0102:3543:0407 |         |   | 0.00179 | 1   |
| A:C:B:DRB1 | 2402:0202:0702:1301 | 0.00183 | 1 |         |     |
| A:C:B:DRB1 | 2402:0202:2705:0101 | 0.00183 | 1 | 0.00179 | 1   |
| A:C:B:DRB1 | 2402:0202:3512:0402 |         |   | 0.00179 | 1   |
| A:C:B:DRB1 | 2402:0202:4403:0102 |         |   | 0.00179 | 1   |
| A:C:B:DRB1 | 2402:0202:4403:1302 | 0.00183 | 1 |         |     |
| A:C:B:DRB1 | 2402:0202:5201:0411 |         |   | 0.00179 | 1   |
| A:C:B:DRB1 | 2402:0210:1503:1101 |         |   | 0.00179 | 1   |
| A:C:B:DRB1 | 2402:0302:5801:1302 |         |   | 0.00179 | 1   |
| A:C:B:DRB1 | 2402:0303:1501:1601 | 0.00183 | 1 |         |     |
| A:C:B:DRB1 | 2402:0303:5101:0701 |         |   | 0.00179 | 1   |
| A:C:B:DRB1 | 2402:0303:5301:1401 |         |   | 0.00179 | 1   |

|            |                     |         |   |         |   |
|------------|---------------------|---------|---|---------|---|
| A:C:B:DRB1 | 2402:0304:1501:1602 |         |   | 0.00179 | 1 |
| A:C:B:DRB1 | 2402:0304:3501:0102 |         |   | 0.00179 | 1 |
| A:C:B:DRB1 | 2402:0304:4001:0101 | 0.00183 | 1 |         |   |
| A:C:B:DRB1 | 2402:0304:4001:1302 | 0.00549 | 3 |         |   |
| A:C:B:DRB1 | 2402:0305:4002:0404 |         |   | 0.00179 | 1 |
| A:C:B:DRB1 | 2402:0306:4002:0407 |         |   | 0.00179 | 1 |
| A:C:B:DRB1 | 2402:0401:1801:1404 | 0.00183 | 1 |         |   |
| A:C:B:DRB1 | 2402:0401:2705:0407 |         |   | 0.00179 | 1 |
| A:C:B:DRB1 | 2402:0401:3501:0301 |         |   | 0.00179 | 1 |
| A:C:B:DRB1 | 2402:0401:3501:0407 | 0.00183 | 1 |         |   |
| A:C:B:DRB1 | 2402:0401:3501:0801 | 0.00366 | 2 |         |   |
| A:C:B:DRB1 | 2402:0401:3501:1101 | 0.00183 | 1 |         |   |
| A:C:B:DRB1 | 2402:0401:3501:1104 | 0.00366 | 2 |         |   |
| A:C:B:DRB1 | 2402:0401:3502:0401 | 0.00183 | 1 |         |   |
| A:C:B:DRB1 | 2402:0401:3502:1101 | 0.00183 | 1 |         |   |
| A:C:B:DRB1 | 2402:0401:3502:1104 |         |   | 0.00717 | 4 |
| A:C:B:DRB1 | 2402:0401:3502:1202 | 0.00183 | 1 |         |   |
| A:C:B:DRB1 | 2402:0401:3503:0701 |         |   | 0.00358 | 2 |
| A:C:B:DRB1 | 2402:0401:3512:0411 |         |   | 0.00179 | 1 |
| A:C:B:DRB1 | 2402:0401:3512:0802 |         |   | 0.00358 | 2 |
| A:C:B:DRB1 | 2402:0401:3906:0801 | 0.00183 | 1 |         |   |
| A:C:B:DRB1 | 2402:0401:5101:0407 |         |   | 0.00358 | 2 |
| A:C:B:DRB1 | 2402:0501:0702:1501 | 0.00183 | 1 |         |   |
| A:C:B:DRB1 | 2402:0501:4402:0101 | 0.00183 | 1 |         |   |
| A:C:B:DRB1 | 2402:0501:4402:1301 | 0.00183 | 1 |         |   |
| A:C:B:DRB1 | 2402:0602:1302:1101 |         |   | 0.00179 | 1 |
| A:C:B:DRB1 | 2402:0602:4701:1101 |         |   | 0.00179 | 1 |
| A:C:B:DRB1 | 2402:0602:5002:0406 | 0.00183 | 1 |         |   |
| A:C:B:DRB1 | 2402:0602:5701:1001 | 0.00183 | 1 |         |   |
| A:C:B:DRB1 | 2402:0701:0801:0301 |         |   | 0.00179 | 1 |
| A:C:B:DRB1 | 2402:0701:1801:1301 | 0.00183 | 1 |         |   |
| A:C:B:DRB1 | 2402:0701:1801:1601 |         |   | 0.00179 | 1 |

|            |                     |         |   |         |   |
|------------|---------------------|---------|---|---------|---|
| A:C:B:DRB1 | 2402:0701:3505:0802 |         |   | 0.00179 | 1 |
| A:C:B:DRB1 | 2402:0701:4405:1104 | 0.00183 | 1 |         |   |
| A:C:B:DRB1 | 2402:0701:5001:1401 | 0.00183 | 1 |         |   |
| A:C:B:DRB1 | 2402:0701:5703:1303 |         |   | 0.00179 | 1 |
| A:C:B:DRB1 | 2402:0702:0702:0701 | 0.00183 | 1 |         |   |
| A:C:B:DRB1 | 2402:0702:1515:0407 |         |   | 0.00179 | 1 |
| A:C:B:DRB1 | 2402:0702:2702:1104 |         |   | 0.00179 | 1 |
| A:C:B:DRB1 | 2402:0702:3501:0101 | 0.00366 | 2 |         |   |
| A:C:B:DRB1 | 2402:0702:3906:1406 |         |   | 0.00538 | 3 |
| A:C:B:DRB1 | 2402:0702:3906:1502 |         |   | 0.00179 | 1 |
| A:C:B:DRB1 | 2402:0702:3911:0407 |         |   | 0.00179 | 1 |
| A:C:B:DRB1 | 2402:0702:4402:1301 |         |   | 0.00179 | 1 |
| A:C:B:DRB1 | 2402:0702:5501:1401 | 0.00183 | 1 |         |   |
| A:C:B:DRB1 | 2402:0704:1518:0402 |         |   | 0.00179 | 1 |
| A:C:B:DRB1 | 2402:0801:4801:0404 |         |   | 0.00358 | 2 |
| A:C:B:DRB1 | 2402:0801:4801:1402 |         |   | 0.00179 | 1 |
| A:C:B:DRB1 | 2402:0802:1402:0102 | 0.00183 | 1 |         |   |
| A:C:B:DRB1 | 2402:0802:1801:1201 | 0.00183 | 1 |         |   |
| A:C:B:DRB1 | 2402:1203:1402:1303 | 0.00183 | 1 |         |   |
| A:C:B:DRB1 | 2402:1203:1801:1104 | 0.00366 | 2 |         |   |
| A:C:B:DRB1 | 2402:1203:1801:1302 | 0.00183 | 1 |         |   |
| A:C:B:DRB1 | 2402:1203:3503:0401 | 0.00183 | 1 |         |   |
| A:C:B:DRB1 | 2402:1203:3503:0701 |         |   | 0.00358 | 2 |
| A:C:B:DRB1 | 2402:1203:3801:1104 | 0.00183 | 1 |         |   |
| A:C:B:DRB1 | 2402:1203:3901:0802 |         |   | 0.00179 | 1 |
| A:C:B:DRB1 | 2402:1402:1516:0302 |         |   | 0.00179 | 1 |
| A:C:B:DRB1 | 2402:1402:5101:0301 | 0.00183 | 1 |         |   |
| A:C:B:DRB1 | 2402:1402:5101:0408 | 0.00183 | 1 |         |   |
| A:C:B:DRB1 | 2402:1502:3901:1601 | 0.00183 | 1 |         |   |
| A:C:B:DRB1 | 2402:1502:5101:0404 | 0.00183 | 1 |         |   |
| A:C:B:DRB1 | 2402:1502:5201:1602 |         |   | 0.00179 | 1 |
| A:C:B:DRB1 | 2402:1505:5101:1501 | 0.00183 | 1 |         |   |



|            |                     |         |   |         |   |
|------------|---------------------|---------|---|---------|---|
| A:C:B:DRB1 | 2402:1509:3501:0407 |         |   | 0.00179 | 1 |
| A:C:B:DRB1 | 2402:1602:5101:0701 |         |   | 0.00179 | 1 |
| A:C:B:DRB1 | 2402:1604:4402:0402 | 0.00183 | 1 |         |   |
| A:C:B:DRB1 | 2402:1701:4101:1302 | 0.00183 | 1 |         |   |
| A:C:B:DRB1 | 2402:1801:4901:0405 |         |   | 0.00179 | 1 |
| A:C:B:DRB1 | 2402:1801:5703:1301 |         |   | 0.00179 | 1 |
| A:C:B:DRB1 | 2403:0303:1501:1601 | 0.00183 | 1 |         |   |
| A:C:B:DRB1 | 2403:0401:3501:1301 |         |   | 0.00179 | 1 |
| A:C:B:DRB1 | 2403:1601:1801:1302 |         |   | 0.00179 | 1 |
| A:C:B:DRB1 | 2425:0801:3801:0701 |         |   | 0.00179 | 1 |
| A:C:B:DRB1 | 2501:0303:5501:0301 | 0.00183 | 1 |         |   |
| A:C:B:DRB1 | 2501:0304:4001:0701 | 0.00183 | 1 |         |   |
| A:C:B:DRB1 | 2501:0401:3501:1401 | 0.00183 | 1 |         |   |
| A:C:B:DRB1 | 2501:0401:3502:1501 | 0.00183 | 1 |         |   |
| A:C:B:DRB1 | 2501:0401:3503:1303 |         |   | 0.00179 | 1 |
| A:C:B:DRB1 | 2501:0501:5601:1301 |         |   | 0.00179 | 1 |
| A:C:B:DRB1 | 2501:0602:1503:0401 | 0.00183 | 1 |         |   |
| A:C:B:DRB1 | 2501:0602:5701:1601 | 0.00183 | 1 | 0.00179 | 1 |
| A:C:B:DRB1 | 2501:0701:1801:0901 | 0.00183 | 1 |         |   |
| A:C:B:DRB1 | 2501:1203:1801:1101 | 0.00366 | 2 |         |   |
| A:C:B:DRB1 | 2501:1203:1801:1302 | 0.00183 | 1 |         |   |
| A:C:B:DRB1 | 2501:1203:1801:1501 |         |   | 0.00717 | 4 |
| A:C:B:DRB1 | 2501:1203:3901:1601 | 0.00183 | 1 |         |   |
| A:C:B:DRB1 | 2501:1402:1501:1001 |         |   | 0.00179 | 1 |
| A:C:B:DRB1 | 2501:1502:5101:0404 | 0.00183 | 1 |         |   |
| A:C:B:DRB1 | 2601:0102:2705:0101 |         |   | 0.00179 | 1 |
| A:C:B:DRB1 | 2601:0202:2702:1101 | 0.00183 | 1 |         |   |
| A:C:B:DRB1 | 2601:0202:3501:0101 | 0.00183 | 1 |         |   |
| A:C:B:DRB1 | 2601:0303:3501:1103 |         |   | 0.00179 | 1 |
| A:C:B:DRB1 | 2601:0304:0801:0810 | 0.00183 | 1 |         |   |
| A:C:B:DRB1 | 2601:0304:4004:0410 |         |   | 0.00179 | 1 |
| A:C:B:DRB1 | 2601:0304:8101:0101 |         |   | 0.00179 | 1 |

|            |                     |         |   |         |   |
|------------|---------------------|---------|---|---------|---|
| A:C:B:DRB1 | 2601:0401:0702:1104 | 0.00183 | 1 |         |   |
| A:C:B:DRB1 | 2601:0401:3508:1101 | 0.00183 | 1 |         |   |
| A:C:B:DRB1 | 2601:0401:5101:1602 | 0.00183 | 1 |         |   |
| A:C:B:DRB1 | 2601:0501:4402:1502 |         |   | 0.00179 | 1 |
| A:C:B:DRB1 | 2601:0602:3701:1001 |         |   | 0.00717 | 4 |
| A:C:B:DRB1 | 2601:0602:5501:0407 | 0.00183 | 1 |         |   |
| A:C:B:DRB1 | 2601:0602:5701:0701 | 0.00183 | 1 |         |   |
| A:C:B:DRB1 | 2601:0701:0801:0404 | 0.00183 | 1 |         |   |
| A:C:B:DRB1 | 2601:0701:1801:0301 |         |   | 0.00179 | 1 |
| A:C:B:DRB1 | 2601:0701:4901:0407 | 0.00183 | 1 |         |   |
| A:C:B:DRB1 | 2601:0702:4429:1501 | 0.00183 | 1 |         |   |
| A:C:B:DRB1 | 2601:0802:3801:1001 | 0.00183 | 1 |         |   |
| A:C:B:DRB1 | 2601:1203:1503:1301 |         |   | 0.00179 | 1 |
| A:C:B:DRB1 | 2601:1203:1801:1104 |         |   | 0.00179 | 1 |
| A:C:B:DRB1 | 2601:1203:3501:1602 |         |   | 0.00179 | 1 |
| A:C:B:DRB1 | 2601:1203:3801:0402 | 0.00366 | 2 |         |   |
| A:C:B:DRB1 | 2601:1203:3801:1103 |         |   | 0.00179 | 1 |
| A:C:B:DRB1 | 2601:1203:3901:0403 | 0.00183 | 1 |         |   |
| A:C:B:DRB1 | 2601:1203:3901:0701 | 0.00183 | 1 |         |   |
| A:C:B:DRB1 | 2601:1403:4403:0405 | 0.00183 | 1 |         |   |
| A:C:B:DRB1 | 2601:1502:4901:1302 |         |   | 0.00179 | 1 |
| A:C:B:DRB1 | 2901:0501:4402:0701 | 0.00183 | 1 |         |   |
| A:C:B:DRB1 | 2901:1202:5201:1302 | 0.00183 | 1 |         |   |
| A:C:B:DRB1 | 2901:1502:0705:1001 | 0.00183 | 1 |         |   |
| A:C:B:DRB1 | 2901:1502:5101:0301 | 0.00183 | 1 |         |   |
| A:C:B:DRB1 | 2901:1505:0705:0701 | 0.00183 | 1 |         |   |
| A:C:B:DRB1 | 2902:0102:5601:0101 |         |   | 0.00179 | 1 |
| A:C:B:DRB1 | 2902:0202:0702:0101 | 0.00183 | 1 |         |   |
| A:C:B:DRB1 | 2902:0202:4403:0701 |         |   | 0.00179 | 1 |
| A:C:B:DRB1 | 2902:0210:1503:0701 |         |   | 0.00179 | 1 |
| A:C:B:DRB1 | 2902:0303:1501:1301 | 0.00183 | 1 |         |   |
| A:C:B:DRB1 | 2902:0303:1801:1101 | 0.00183 | 1 |         |   |

|            |                     |         |   |         |    |
|------------|---------------------|---------|---|---------|----|
| A:C:B:DRB1 | 2902:0304:0702:1401 | 0.00183 | 1 |         |    |
| A:C:B:DRB1 | 2902:0401:1302:0404 |         |   | 0.00179 | 1  |
| A:C:B:DRB1 | 2902:0401:3501:0401 | 0.00183 | 1 |         |    |
| A:C:B:DRB1 | 2902:0401:3501:1301 |         |   | 0.00179 | 1  |
| A:C:B:DRB1 | 2902:0401:3501:1302 | 0.00183 | 1 |         |    |
| A:C:B:DRB1 | 2902:0401:4403:1501 |         |   | 0.00358 | 2  |
| A:C:B:DRB1 | 2902:0501:4402:0301 |         |   | 0.00179 | 1  |
| A:C:B:DRB1 | 2902:0602:5101:0101 |         |   | 0.00179 | 1  |
| A:C:B:DRB1 | 2902:0701:0801:1302 |         |   | 0.00179 | 1  |
| A:C:B:DRB1 | 2902:0702:0702:0404 | 0.00183 | 1 |         |    |
| A:C:B:DRB1 | 2902:0702:0702:0701 |         |   | 0.00179 | 1  |
| A:C:B:DRB1 | 2902:0802:1401:0405 | 0.00183 | 1 |         |    |
| A:C:B:DRB1 | 2902:1502:5101:1101 | 0.00183 | 1 |         |    |
| A:C:B:DRB1 | 2902:1601:4403:0102 |         |   | 0.00179 | 1  |
| A:C:B:DRB1 | 2902:1601:4403:0701 | 0.01465 | 8 | 0.0233  | 13 |
| A:C:B:DRB1 | 2902:1601:4403:1103 |         |   | 0.00179 | 1  |
| A:C:B:DRB1 | 2902:1601:5002:1401 |         |   | 0.00179 | 1  |
| A:C:B:DRB1 | 2902:1601:5301:1301 |         |   | 0.00179 | 1  |
| A:C:B:DRB1 | 2902:1801:5301:0301 |         |   | 0.00179 | 1  |
| A:C:B:DRB1 | 3001:0102:5501:1301 | 0.00183 | 1 |         |    |
| A:C:B:DRB1 | 3001:0202:5001:0301 |         |   | 0.00179 | 1  |
| A:C:B:DRB1 | 3001:0304:4403:1501 |         |   | 0.00179 | 1  |
| A:C:B:DRB1 | 3001:0304:5801:0801 |         |   | 0.00179 | 1  |
| A:C:B:DRB1 | 3001:0401:4403:1101 | 0.00366 | 2 |         |    |
| A:C:B:DRB1 | 3001:0501:4402:0402 |         |   | 0.00179 | 1  |
| A:C:B:DRB1 | 3001:0602:1302:0701 | 0.01099 | 6 |         |    |
| A:C:B:DRB1 | 3001:0602:1302:1302 | 0.00183 | 1 |         |    |
| A:C:B:DRB1 | 3001:0602:1801:0102 | 0.00183 | 1 |         |    |
| A:C:B:DRB1 | 3001:0602:3701:1502 | 0.00183 | 1 |         |    |
| A:C:B:DRB1 | 3001:0602:4001:1104 | 0.00183 | 1 |         |    |
| A:C:B:DRB1 | 3001:0602:4002:0102 |         |   | 0.00179 | 1  |
| A:C:B:DRB1 | 3001:0602:5001:1501 |         |   | 0.00179 | 1  |

|            |                     |         |   |         |   |
|------------|---------------------|---------|---|---------|---|
| A:C:B:DRB1 | 3001:0701:1801:1301 |         |   | 0.00179 | 1 |
| A:C:B:DRB1 | 3001:0701:4403:1401 |         |   | 0.00179 | 1 |
| A:C:B:DRB1 | 3001:0701:4901:1101 | 0.00183 | 1 |         |   |
| A:C:B:DRB1 | 3001:0701:8101:1201 |         |   | 0.00179 | 1 |
| A:C:B:DRB1 | 3001:0702:0702:0401 | 0.00183 | 1 |         |   |
| A:C:B:DRB1 | 3001:1202:4201:0301 |         |   | 0.00179 | 1 |
| A:C:B:DRB1 | 3001:1203:3801:1302 |         |   | 0.00179 | 1 |
| A:C:B:DRB1 | 3001:1402:1516:1102 |         |   | 0.00179 | 1 |
| A:C:B:DRB1 | 3001:1502:4002:0801 | 0.00183 | 1 |         |   |
| A:C:B:DRB1 | 3002:0102:1501:0407 |         |   | 0.00179 | 1 |
| A:C:B:DRB1 | 3002:0102:1801:1301 |         |   | 0.00179 | 1 |
| A:C:B:DRB1 | 3002:0302:5801:0102 | 0.00366 | 2 |         |   |
| A:C:B:DRB1 | 3002:0401:3501:1104 |         |   | 0.00179 | 1 |
| A:C:B:DRB1 | 3002:0401:3501:1501 |         |   | 0.00179 | 1 |
| A:C:B:DRB1 | 3002:0401:5301:1303 |         |   | 0.00179 | 1 |
| A:C:B:DRB1 | 3002:0401:7801:0302 |         |   | 0.00179 | 1 |
| A:C:B:DRB1 | 3002:0501:1801:0301 | 0.00549 | 3 | 0.00717 | 4 |
| A:C:B:DRB1 | 3002:0501:1801:0401 | 0.00183 | 1 |         |   |
| A:C:B:DRB1 | 3002:0701:0801:0301 |         |   | 0.00538 | 3 |
| A:C:B:DRB1 | 3002:0701:0801:0701 | 0.00183 | 1 |         |   |
| A:C:B:DRB1 | 3002:0701:1801:1503 | 0.00183 | 1 |         |   |
| A:C:B:DRB1 | 3002:0702:0702:0901 |         |   | 0.00179 | 1 |
| A:C:B:DRB1 | 3002:0802:1401:0701 | 0.00183 | 1 |         |   |
| A:C:B:DRB1 | 3002:0802:1402:1503 |         |   | 0.00179 | 1 |
| A:C:B:DRB1 | 3002:1601:4501:1302 |         |   | 0.00179 | 1 |
| A:C:B:DRB1 | 3002:1701:4201:1104 |         |   | 0.00179 | 1 |
| A:C:B:DRB1 | 3004:0701:0801:0301 |         |   | 0.00179 | 1 |
| A:C:B:DRB1 | 3004:0701:4403:0701 |         |   | 0.00358 | 2 |
| A:C:B:DRB1 | 3004:1701:4101:1302 | 0.00183 | 1 |         |   |
| A:C:B:DRB1 | 3101:0102:2705:0101 | 0.00183 | 1 |         |   |
| A:C:B:DRB1 | 3101:0102:4402:0901 |         |   | 0.00179 | 1 |
| A:C:B:DRB1 | 3101:0202:2705:0301 | 0.00183 | 1 |         |   |

|            |                     |         |   |         |   |
|------------|---------------------|---------|---|---------|---|
| A:C:B:DRB1 | 3101:0202:4002:1101 | 0.00183 | 1 |         |   |
| A:C:B:DRB1 | 3101:0202:4403:0102 |         |   | 0.00179 | 1 |
| A:C:B:DRB1 | 3101:0303:1516:0701 |         |   | 0.00179 | 1 |
| A:C:B:DRB1 | 3101:0304:4001:0404 | 0.00916 | 5 |         |   |
| A:C:B:DRB1 | 3101:0304:4002:0407 |         |   | 0.00179 | 1 |
| A:C:B:DRB1 | 3101:0304:4002:1402 |         |   | 0.00179 | 1 |
| A:C:B:DRB1 | 3101:0304:5101:0404 |         |   | 0.00179 | 1 |
| A:C:B:DRB1 | 3101:0401:3501:1401 | 0.00183 | 1 |         |   |
| A:C:B:DRB1 | 3101:0401:3501:1402 |         |   | 0.00358 | 2 |
| A:C:B:DRB1 | 3101:0401:3504:0807 |         |   | 0.00179 | 1 |
| A:C:B:DRB1 | 3101:0401:3508:1104 | 0.00183 | 1 |         |   |
| A:C:B:DRB1 | 3101:0401:3512:0407 |         |   | 0.00179 | 1 |
| A:C:B:DRB1 | 3101:0501:1507:1406 |         |   | 0.00179 | 1 |
| A:C:B:DRB1 | 3101:0501:5001:0701 |         |   | 0.00179 | 1 |
| A:C:B:DRB1 | 3101:0501:5101:1302 |         |   | 0.00179 | 1 |
| A:C:B:DRB1 | 3101:0602:1302:0701 |         |   | 0.00179 | 1 |
| A:C:B:DRB1 | 3101:0701:0801:0401 | 0.00183 | 1 |         |   |
| A:C:B:DRB1 | 3101:0701:5801:0804 | 0.00183 | 1 |         |   |
| A:C:B:DRB1 | 3101:0702:0702:1101 | 0.00183 | 1 |         |   |
| A:C:B:DRB1 | 3101:0702:2705:0802 |         |   | 0.00179 | 1 |
| A:C:B:DRB1 | 3101:0702:3903:1402 |         |   | 0.00358 | 2 |
| A:C:B:DRB1 | 3101:0702:4001:0301 | 0.00183 | 1 |         |   |
| A:C:B:DRB1 | 3101:0704:5101:0101 |         |   | 0.00179 | 1 |
| A:C:B:DRB1 | 3101:1203:3508:1502 | 0.00183 | 1 |         |   |
| A:C:B:DRB1 | 3101:1502:5101:0101 | 0.00183 | 1 |         |   |
| A:C:B:DRB1 | 3101:1502:5102:0410 | 0.00183 | 1 |         |   |
| A:C:B:DRB1 | 3101:1502:5501:0801 |         |   | 0.00179 | 1 |
| A:C:B:DRB1 | 3102:1502:5101:0802 |         |   | 0.00179 | 1 |
| A:C:B:DRB1 | 3201:0102:2705:1201 | 0.00183 | 1 |         |   |
| A:C:B:DRB1 | 3201:0202:4002:1101 |         |   | 0.00358 | 2 |
| A:C:B:DRB1 | 3201:0303:1517:1302 | 0.00183 | 1 |         |   |
| A:C:B:DRB1 | 3201:0304:1402:0401 | 0.00183 | 1 |         |   |

|            |                     |         |   |         |   |
|------------|---------------------|---------|---|---------|---|
| A:C:B:DRB1 | 3201:0304:1501:0401 | 0.00183 | 1 |         |   |
| A:C:B:DRB1 | 3201:0304:5101:1101 | 0.00183 | 1 |         |   |
| A:C:B:DRB1 | 3201:0304:5801:1303 |         |   | 0.00179 | 1 |
| A:C:B:DRB1 | 3201:0401:3501:0405 |         |   | 0.00179 | 1 |
| A:C:B:DRB1 | 3201:0401:3501:1104 | 0.00183 | 1 |         |   |
| A:C:B:DRB1 | 3201:0401:3501:1302 | 0.00183 | 1 |         |   |
| A:C:B:DRB1 | 3201:0401:4403:0101 |         |   | 0.00179 | 1 |
| A:C:B:DRB1 | 3201:0401:5301:1503 |         |   | 0.00179 | 1 |
| A:C:B:DRB1 | 3201:0501:1801:1101 | 0.00183 | 1 |         |   |
| A:C:B:DRB1 | 3201:0501:4402:0801 | 0.00183 | 1 |         |   |
| A:C:B:DRB1 | 3201:0501:4402:1101 | 0.00183 | 1 |         |   |
| A:C:B:DRB1 | 3201:0701:0801:0301 |         |   | 0.00179 | 1 |
| A:C:B:DRB1 | 3201:0701:1801:1501 | 0.00183 | 1 |         |   |
| A:C:B:DRB1 | 3201:0701:4901:0101 | 0.00183 | 1 |         |   |
| A:C:B:DRB1 | 3201:0701:5801:1101 | 0.00183 | 1 |         |   |
| A:C:B:DRB1 | 3201:0702:0702:0901 | 0.00183 | 1 |         |   |
| A:C:B:DRB1 | 3201:0702:0702:1104 | 0.00183 | 1 |         |   |
| A:C:B:DRB1 | 3201:1402:1516:1201 | 0.00183 | 1 |         |   |
| A:C:B:DRB1 | 3201:1602:1402:0301 | 0.00183 | 1 |         |   |
| A:C:B:DRB1 | 3201:1701:4101:1301 | 0.00183 | 1 |         |   |
| A:C:B:DRB1 | 3201:1701:4901:0404 |         |   | 0.00179 | 1 |
| A:C:B:DRB1 | 3301:0202:4403:0403 |         |   | 0.00179 | 1 |
| A:C:B:DRB1 | 3301:0401:1402:0405 |         |   | 0.00179 | 1 |
| A:C:B:DRB1 | 3301:0401:5301:1301 |         |   | 0.00179 | 1 |
| A:C:B:DRB1 | 3301:0602:5802:0102 |         |   | 0.00179 | 1 |
| A:C:B:DRB1 | 3301:0702:0702:0101 |         |   | 0.00179 | 1 |
| A:C:B:DRB1 | 3301:0702:3905:0411 |         |   | 0.00179 | 1 |
| A:C:B:DRB1 | 3301:0702:4201:0302 | 0.00183 | 1 |         |   |
| A:C:B:DRB1 | 3301:0802:1402:0102 | 0.01099 | 6 | 0.00896 | 5 |
| A:C:B:DRB1 | 3301:0802:1402:1101 | 0.00366 | 2 |         |   |
| A:C:B:DRB1 | 3301:0802:1402:1501 |         |   | 0.00179 | 1 |
| A:C:B:DRB1 | 3301:0802:4001:1301 | 0.00183 | 1 |         |   |

|            |                     |         |   |         |   |
|------------|---------------------|---------|---|---------|---|
| A:C:B:DRB1 | 3301:0802:5108:0402 | 0.00183 | 1 |         |   |
| A:C:B:DRB1 | 3301:1203:1402:1601 | 0.00183 | 1 |         |   |
| A:C:B:DRB1 | 3301:1601:4403:0701 |         |   | 0.00179 | 1 |
| A:C:B:DRB1 | 3301:1601:7801:1301 |         |   | 0.00179 | 1 |
| A:C:B:DRB1 | 3303:0302:5801:1301 |         |   | 0.00179 | 1 |
| A:C:B:DRB1 | 3303:0401:5301:1401 |         |   | 0.00179 | 1 |
| A:C:B:DRB1 | 3303:0702:5101:1301 | 0.00183 | 1 |         |   |
| A:C:B:DRB1 | 3303:0802:8101:1101 |         |   | 0.00179 | 1 |
| A:C:B:DRB1 | 3303:1203:1801:1104 |         |   | 0.00179 | 1 |
| A:C:B:DRB1 | 3303:1203:3906:1601 | 0.00183 | 1 |         |   |
| A:C:B:DRB1 | 3305:0802:1402:0102 | 0.00183 | 1 |         |   |
| A:C:B:DRB1 | 3402:0401:5101:1503 |         |   | 0.00358 | 2 |
| A:C:B:DRB1 | 3601:0401:8101:1303 |         |   | 0.00179 | 1 |
| A:C:B:DRB1 | 3601:1801:5703:1602 |         |   | 0.00179 | 1 |
| A:C:B:DRB1 | 6601:0701:1517:0804 | 0.00183 | 1 |         |   |
| A:C:B:DRB1 | 6601:1402:5101:1301 | 0.00183 | 1 |         |   |
| A:C:B:DRB1 | 6601:1701:4102:1303 | 0.00916 | 5 |         |   |
| A:C:B:DRB1 | 6602:0701:5801:1503 |         |   | 0.00179 | 1 |
| A:C:B:DRB1 | 6801:0102:1515:0802 |         |   | 0.00179 | 1 |
| A:C:B:DRB1 | 6801:0202:5101:0701 |         |   | 0.00179 | 1 |
| A:C:B:DRB1 | 6801:0304:4001:1302 |         |   | 0.00358 | 2 |
| A:C:B:DRB1 | 6801:0304:4002:1501 |         |   | 0.00179 | 1 |
| A:C:B:DRB1 | 6801:0304:4005:0411 |         |   | 0.00179 | 1 |
| A:C:B:DRB1 | 6801:0304:4801:0802 |         |   | 0.00179 | 1 |
| A:C:B:DRB1 | 6801:0304:4901:1102 |         |   | 0.00179 | 1 |
| A:C:B:DRB1 | 6801:0304:5201:0802 |         |   | 0.00179 | 1 |
| A:C:B:DRB1 | 6801:0401:1501:0407 |         |   | 0.00179 | 1 |
| A:C:B:DRB1 | 6801:0401:3501:0103 | 0.00183 | 1 |         |   |
| A:C:B:DRB1 | 6801:0401:3503:0103 |         |   | 0.00179 | 1 |
| A:C:B:DRB1 | 6801:0401:3512:1001 |         |   | 0.00179 | 1 |
| A:C:B:DRB1 | 6801:0501:4402:1101 |         |   | 0.00179 | 1 |
| A:C:B:DRB1 | 6801:0501:5101:0701 | 0.00183 | 1 |         |   |

|            |                     |         |   |         |   |
|------------|---------------------|---------|---|---------|---|
| A:C:B:DRB1 | 6801:0602:4701:1302 | 0.00183 | 1 |         |   |
| A:C:B:DRB1 | 6801:0602:5201:0802 |         |   | 0.00179 | 1 |
| A:C:B:DRB1 | 6801:0602:5301:0801 |         |   | 0.00179 | 1 |
| A:C:B:DRB1 | 6801:0701:4004:0404 |         |   | 0.00179 | 1 |
| A:C:B:DRB1 | 6801:0702:0702:1501 | 0.00183 | 1 |         |   |
| A:C:B:DRB1 | 6801:0704:1518:1301 |         |   | 0.00179 | 1 |
| A:C:B:DRB1 | 6801:0704:4402:0101 | 0.00183 | 1 |         |   |
| A:C:B:DRB1 | 6801:0801:5101:0901 |         |   | 0.00179 | 1 |
| A:C:B:DRB1 | 6801:1203:3503:0401 | 0.00183 | 1 |         |   |
| A:C:B:DRB1 | 6801:1203:3801:1301 | 0.00183 | 1 |         |   |
| A:C:B:DRB1 | 6801:1402:5001:0701 |         |   | 0.00179 | 1 |
| A:C:B:DRB1 | 6801:1402:5101:0402 | 0.00183 | 1 |         |   |
| A:C:B:DRB1 | 6801:1402:5101:0404 |         |   | 0.00179 | 1 |
| A:C:B:DRB1 | 6801:1502:4001:1301 | 0.00183 | 1 |         |   |
| A:C:B:DRB1 | 6801:1502:4402:1101 |         |   | 0.00179 | 1 |
| A:C:B:DRB1 | 6801:1502:5201:0407 |         |   | 0.00179 | 1 |
| A:C:B:DRB1 | 6802:0401:3502:1104 | 0.00183 | 1 |         |   |
| A:C:B:DRB1 | 6802:0401:3502:1302 | 0.00183 | 1 |         |   |
| A:C:B:DRB1 | 6802:0401:5301:0102 |         |   | 0.00179 | 1 |
| A:C:B:DRB1 | 6802:0602:1503:1302 |         |   | 0.00179 | 1 |
| A:C:B:DRB1 | 6802:0602:5001:1001 |         |   | 0.00179 | 1 |
| A:C:B:DRB1 | 6802:0701:1402:1104 | 0.00183 | 1 |         |   |
| A:C:B:DRB1 | 6802:0802:1401:0901 |         |   | 0.00179 | 1 |
| A:C:B:DRB1 | 6802:1502:5101:0408 | 0.00183 | 1 |         |   |
| A:C:B:DRB1 | 6802:1505:5301:0301 |         |   | 0.00179 | 1 |
| A:C:B:DRB1 | 6802:1801:0801:1304 |         |   | 0.00179 | 1 |
| A:C:B:DRB1 | 6802:1801:1402:1302 |         |   | 0.00179 | 1 |
| A:C:B:DRB1 | 6803:0305:4002:1401 |         |   | 0.00179 | 1 |
| A:C:B:DRB1 | 6803:0702:3905:0407 |         |   | 0.00896 | 5 |
| A:C:B:DRB1 | 6805:0702:3911:0407 |         |   | 0.00179 | 1 |
| A:C:B:DRB1 | 6901:0602:1302:0701 | 0.00183 | 1 |         |   |
| A:C:B:DRB1 | 6901:0602:4901:1101 |         |   | 0.00179 | 1 |



|            |                     |         |   |         |   |
|------------|---------------------|---------|---|---------|---|
| A:C:B:DRB1 | 6901:1202:5201:0701 | 0.00183 | 1 |         |   |
| A:C:B:DRB1 | 7401:0202:2705:1101 |         |   | 0.00179 | 1 |
| A:C:B:DRB1 | 7401:0304:0801:0804 |         |   | 0.00179 | 1 |
| A:C:B:DRB1 | 7401:0602:5001:1102 |         |   | 0.00179 | 1 |
| A:C:B:DRB1 | 7401:0801:4002:1602 |         |   | 0.00179 | 1 |
| A:C:B:DRB1 | 7401:1602:5108:0301 |         |   | 0.00179 | 1 |
| A:C:B:DRB1 | 8001:0401:4403:1501 |         |   | 0.00179 | 1 |
| A:C:B:DRB1 | 8001:0701:0801:1301 |         |   | 0.00358 | 2 |
| A:C:B:DRB1 | 8001:0701:4402:0804 | 0.00183 | 1 |         |   |
